# Supplementary material for: Organic acid induced olefination reaction of lactones
Source: Royal Society of Chemistry journal article supplement (doi:10.1039/c2cc33606e), 2012-01-01
Supplement: c2cc33606e.pdf [file c2cc33606e.pdf]

## Organic acid induced olefination reaction of lactones

Hikaru Yanai\* and Takeo Taguchi\*

*School of Pharmacy, Tokyo University of Pharmacy and Life Sciences*

*1432-1 Horinouchi, Hachioji, Tokyo 192-0392, Japan*

E-mail: yanai@toyaku.ac.jp (H. Yanai), taguchi@toyaku.ac.jp (T. Taguchi)

### Supporting Information

#### Table of contents

|                                                                    |        |
|--------------------------------------------------------------------|--------|
| 1. General and materials                                           | p. S1  |
| 2. Preparation of lactone substrates                               | p. S1  |
| 3. Carbon acid induced olefination reaction of lactones            | p. S4  |
| 4. Preparation of Mukaiyama aldol products                         | p. S11 |
| 5. X-ray crystallographic data                                     | p. S15 |
| 6. <sup>1</sup> H and <sup>13</sup> C NMR spectra of all compounds | p. S17 |
| 7. References                                                      | p. S45 |

#### 1. General and materials

All reactions were carried out under Ar atmosphere. Melting points were uncorrected. <sup>1</sup>H and <sup>13</sup>C NMR spectra were taken on a 400 MHz spectrometer, and chemical shifts were reported in parts per million (ppm) using CHCl<sub>3</sub> (7.26 ppm) in CDCl<sub>3</sub> for <sup>1</sup>H NMR, and CDCl<sub>3</sub> (77.01 ppm) for <sup>13</sup>C NMR as an internal standard, respectively. Mass spectra were recorded by an electrospray ionization-time of flight (ESI-TOF) mass spectrometer. Column chromatography was performed on neutral silica gel (Kanto Silica gel 60N, 63-210 μm and 40-100 μm) or basic alumina (ICN Alumina B-Super I). Tf<sub>2</sub>CH<sub>2</sub> was supplied from Central Glass Co. and this compound can be also prepared by Waller's procedure in the laboratory.<sup>1</sup> Tf<sub>2</sub>CHCH<sub>2</sub>CHTf<sub>2</sub> **1a** and triple acid **1c** were prepared from Tf<sub>2</sub>CH<sub>2</sub> by the reported procedure.<sup>2</sup>

#### 2. Preparation of lactone substrates

Isochroman-1-one **2a**, 6*H*-benzo[*c*]chromen-6-one **2f**,<sup>3</sup> and 6-bromoisobenzofuran-1(3*H*)-one **2g**,<sup>4</sup> 3-phenyl-1*H*-isochromen-1-one **2n**<sup>5</sup> were prepared by the reported procedure. Isobenzofuran-1(3*H*)-one (phthalide) **2b** and 5-bromoisobenzofuran-1(3*H*)-one **2h**, and 6-aminoisobenzofuran-1(3*H*)-one were purchased.

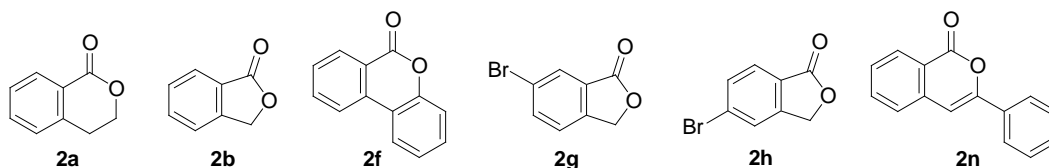

7-Nitroisochroman-1-one **2c**, 7-bromoisochroman-1-one **2d**, *N*-(1-oxisochroman-7-yl)acetamide **2e**,

7-((trimethylsilyl)ethynyl)isochroman-1-one **2i**, and 7-(2-(trimethylsilyl)ethyl)isochroman-1-one **2k** were prepared as follows.

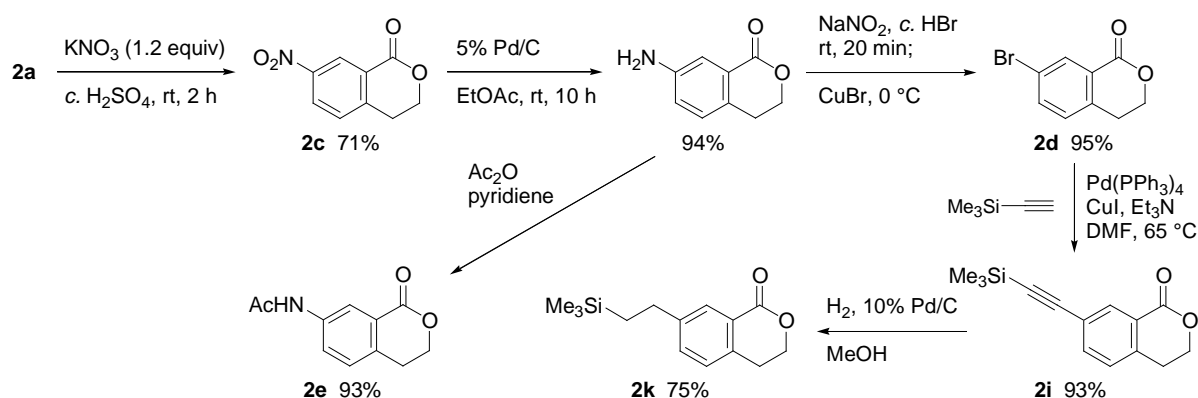

### 7-Nitroisochroman-1-one (**2c**)

To a solution of potassium nitrate (2.5 g, 25 mmol) in concentrated sulfuric acid (6.0 mL), a suspension of isochroman-1-one **2a** (2.52 g, 17.0 mmol) in concentrated sulfuric acid (15 mL) was added at 0 °C. After being stirred for 1 h at room temperature, the reaction mixture was poured into iced water (15 mL) and filtrated through glass filter. The crude solid mass was carefully washed with water (15 mL x 3). The resulting solid was purified by column chromatography on silica gel (hexane/EtOAc = 1 : 1) to give nitrated 7-nitroisochroman-1-one **2c** in 71% yield (2.33 g, 12.1 mmol) as a sole product. Pale yellow crystals (EtOAc); Mp. 115-117 °C; IR (ATR)  $\nu$  3084, 1710, 1527, 1336, 1138, 851, 743, 692  $\text{cm}^{-1}$ ;  $^1\text{H}$  NMR (400 MHz,  $\text{CDCl}_3$ )  $\delta$  3.20 (2H, t,  $J = 5.8$  Hz), 4.60 (2H, t,  $J = 5.8$  Hz), 7.50 (1H, d,  $J = 8.2$  Hz), 8.39 (2H, d,  $J = 8.2$  Hz), 8.95 (1H, s);  $^{13}\text{C}$  NMR (100 MHz,  $\text{CDCl}_3$ )  $\delta$  27.9, 66.8, 125.7, 126.8, 127.9, 128.8, 145.9, 147.7, 162.8; MS (ESI-TOF)  $m/z$  216 [ $\text{M}+\text{Na}$ ] $^+$ ; HRMS calcd for  $\text{C}_9\text{H}_7\text{NNaO}_4$  [ $\text{M}+\text{Na}$ ] $^+$ , 216.0273; found, 216.0273. Anal. Calcd for  $\text{C}_9\text{H}_7\text{NO}_4$ : C, 55.96; H, 3.65; N, 7.25. Found: C, 56.00; H, 3.59; N, 7.16.

### 7-Bromoisochroman-1-one (**2d**)

By stirring 7-nitroisochroman-1-one **2c** (1.31 g, 6.8 mmol) and 10% palladium on active carbon (50% wet, 200 mg) in EtOAc (50 mL) at room temperature for 10 h under  $\text{H}_2$  atmosphere, hydrogenation completely proceeded. After removal of palladium on carbon by filtration, the reaction mixture was concentrated under reduced pressure to give 7-aminoisobenzofuran-1(3H)-one in 94% yield (1.05 g, 6.4 mmol). This lactone (718 mg, 4.4 mmol) was dissolved in a mixture of 46% aqueous hydrobromic acid (10 ml) and water (10 ml), then a solution of  $\text{NaNO}_2$  (1.45 g, 21 mmol) in water (5 ml) was slowly added at 0 °C thereto. After being stirred for 20 min at 0 °C, a solution of copper(I) bromide (790 mg, 5.5 mmol) in 46% aqueous hydrobromic acid (5 ml) was added to the reaction mixture. The resulting mixture was stirred for 40 min at 80 °C and quenched with saturated  $\text{NH}_4\text{Cl}$  aqueous solution (50 mL). This mixture was extracted with EtOAc (50 mL x 3), dried over anhydrous  $\text{Na}_2\text{SO}_4$ , and concentrated under reduced pressure. The obtained residue was purified by column chromatography on silica gel (hexane/EtOAc = 1 : 1) to give 7-bromoisochroman-1-one **2d** in 95% yield (950 mg, 4.2 mmol). Colorless crystals ( $\text{Et}_2\text{O}$ ); Mp. 79.0-81.5 °C; IR (ATR)  $\nu$  3073, 1709, 1595, 1422, 1271, 1066  $\text{cm}^{-1}$ ;  $^1\text{H}$  NMR (400 MHz,  $\text{CDCl}_3$ )  $\delta$  3.02 (2H, t,  $J = 6.0$  Hz), 4.54 (2H, t,  $J = 6.0$  Hz), 7.16 (1H, d,  $J = 8.1$  Hz), 7.66 (1H, d,  $J = 8.1$  Hz), 8.24 (1H, s);  $^{13}\text{C}$  NMR (100 MHz,  $\text{CDCl}_3$ )  $\delta$  27.1, 67.1, 121.0, 126.7, 128.9, 132.7, 136.4, 138.2, 163.6; MS (ESI-TOF)  $m/z$  227 [ $\text{M}+\text{H}$ ] $^+$ , 229 [ $\text{M}+2+\text{H}$ ] $^+$ ; HRMS calcd for  $\text{C}_9\text{H}_8\text{BrO}_2$

$[M+H]^+$ , 226.9708; found, 226.9705. Anal. Calcd for  $C_9H_7BrO_2$ : C, 47.61; H, 3.11. Found: C, 47.39; H, 3.12.

#### ***N*-(1-Oxoisochroman-7-yl)acetamide (2e)**

7-Aminoisochroman-1-one (163 mg, 1.00 mmol) was dissolved with pyridine (1.0 mL) and acetic anhydride (1.0 mL). After being stirred for 0.5 h at 40 °C, the reaction mixture was concentrated under reduced pressure. Chromatographic purification of the residue (silica gel,  $CHCl_3/MeOH = 10 : 1$ ) gave *N*-(1-oxoisochroman-7-yl)acetamide **2e** in 93% yield (190 mg, 0.93 mmol). Colorless crystals ( $CHCl_3$ ); Mp. 165-167 °C; IR (ATR)  $\nu$  3318, 1704, 1680, 1594, 1534, 1499, 1424, 1241, 1187, 839, 692, 537  $cm^{-1}$ ;  $^1H$  NMR (400 MHz,  $CDCl_3$ )  $\delta$  2.22 (3H, s), 3.02 (2H, t,  $J = 6.0$  Hz), 4.54 (2H, t,  $J = 6.0$  Hz), 7.24 (1H, d,  $J = 8.3$  Hz), 7.94 (1H, d,  $J = 2.1$  Hz), 8.25 (1H, dd,  $J = 8.3, 2.1$  Hz), 8.30 (1H, br, NH);  $^{13}C$  NMR (100 MHz,  $CDCl_3$ )  $\delta$  24.4, 27.2, 67.7, 120.8, 125.3, 125.8, 128.1, 134.8, 138.2, 165.3, 169.1; MS (ESI-TOF)  $m/z$  206  $[M+H]^+$ ; HRMS calcd for  $C_{11}H_{12}NO_3$   $[M+H]^+$ , 206.0817; found, 206.0819. Anal. Calcd for  $C_{11}H_{11}NO_3$ : C, 64.38; H, 5.40; N, 6.83. Found: C, 64.02; H, 5.42; N, 6.90.

#### **7-((Trimethylsilyl)ethynyl)isochroman-1-one (2i)**

To a solution of 7-bromoisochroman-1-one **2i** (454 mg, 2.0 mmol), ethynyltrimethylsilane (786 mg, 8.0 mmol), and triethylamine (0.56 mL, 4.0 mmol) in DMF (4.0 mL), copper(I) iodide (133 mg, 0.7 mmol) and  $Pd(PPh_3)_4$  (277 mg, 0.2 mmol) were added at room temperature. After being stirred for 17 h at 65 °C, the reaction mixture was poured into iced water (50 mL), extracted with  $Et_2O$  (30 mL x 3), and concentrated under reduced pressure. The resulting residue was purified by column chromatography on silica gel (hexane/ $EtOAc = 10 : 1$ ) to give 7-((trimethylsilyl)ethynyl)isochroman-1-one **2i** in 97% yield (472 mg, 1.9 mmol). Colorless crystals ( $Et_2O$ ); Mp. 104-105 °C; IR (ATR)  $\nu$  2157, 1718, 1610, 834, 757  $cm^{-1}$ ;  $^1H$  NMR (400 MHz,  $CDCl_3$ )  $\delta$  0.24 (9H, s), 3.04 (2H, t,  $J = 5.8$  Hz), 4.49-4.54 (2H, m), 7.19 (1H, d,  $J = 7.9$  Hz), 7.57 (1H, d,  $J = 7.9$  Hz), 8.17 (1H, brs);  $^{13}C$  NMR (100 MHz,  $CDCl_3$ )  $\delta$  -0.2 (3C), 27.7, 67.1, 95.7, 103.2, 123.0, 125.4, 127.3, 133.8, 136.5, 139.4, 164.2; MS (ESI-TOF)  $m/z$  245  $[M+H]^+$ ; HRMS calcd for  $C_{14}H_{17}O_2Si$   $[M+H]^+$ , 245.0998; found, 245.0990.

#### **7-(2-(Trimethylsilyl)ethyl)isochroman-1-one (2k)**

By stirring alkynylisochroman-1-one **2d** (245 mg, 1.0 mmol) and 10% palladium on active carbon (50% wet, 100 mg) in MeOH (5.0 mL) at room temperature for 18 h under  $H_2$  atmosphere, hydrogenation completely proceeded. The reaction mixture was purified by column chromatography on silica gel (hexane/ $EtOAc = 10 : 1$ ) to give 5-phenethylisobenzofuran-1(3*H*)-one **2k** in 75% yield (186 mg, 0.75 mmol). Colorless oil; IR (ATR)  $\nu$  1721, 1243, 858, 830  $cm^{-1}$ ;  $^1H$  NMR (400 MHz,  $CDCl_3$ )  $\delta$  0.00 (9H, s), 0.81-0.88 (2H, m), 2.59-2.65 (2H, m), 3.00 (2H, t,  $J = 6.0$  Hz), 4.49 (2H, t,  $J = 6.0$  Hz), 7.14 (1H, d,  $J = 7.8$  Hz), 7.35 (1H, d,  $J = 7.8$  Hz), 7.92 (1H, s);  $^{13}C$  NMR (100 MHz,  $CDCl_3$ )  $\delta$  -1.9 (3C), 18.6, 27.4, 29.6, 67.3, 125.0, 127.1, 129.3, 133.3, 136.6, 145.0, 165.4; MS (ESI-TOF)  $m/z$  249  $[M+H]^+$ ; HRMS calcd for  $C_{14}H_{21}O_2Si$   $[M+H]^+$ , 249.1311; found, 249.1316.

5-(Phenylethynyl)isobenzofuran-1(3*H*)-one **2j** and 5-phenethylisobenzofuran-1(3*H*)-one **2m** were prepared as

follows.

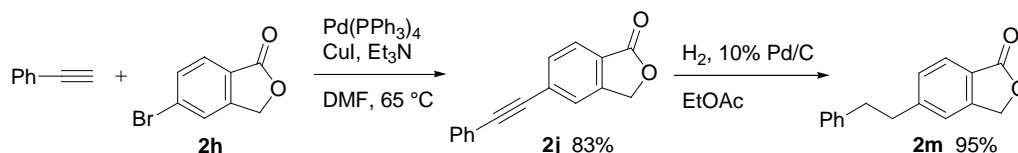

### 5-(Phenylethynyl)isobenzofuran-1(3H)-one (**2j**)

To a solution of 5-bromoisobenzofuran-1(3H)-one **2h** (0.33 g, 1.6 mmol), phenylacetylene (0.63 g, 6.2 mmol), CuI (72.3 mg, 0.38 mmol), and Et<sub>3</sub>N (0.56 mL, 4.0 mmol) in DMF (3.0 mL), Pd(PPh<sub>3</sub>)<sub>4</sub> (215 mg, 0.19 mmol) was added at room temperature. After being stirred at 65 °C for 5 h, the reaction mixture was quenched with H<sub>2</sub>O (25 mL), and extracted with Et<sub>2</sub>O (30 mL x 3). Combined organic layer was washed with brine (15 mL), dried over anhydrous Na<sub>2</sub>SO<sub>4</sub>, and evaporated. The oily residue was purified by flash column chromatography (hexane/EtOAc = 5 : 1) to give 5-(phenylethynyl)isobenzofuran-1(3H)-one **2j** in 83% yield (0.30 g, 1.3 mmol). Pale yellow crystals (EtOAc); Mp. 148-150 °C; IR (ATR)  $\nu$  2201, 1745, 1611, 1344, 1046, 997, 756, 683 cm<sup>-1</sup>; <sup>1</sup>H NMR (400 MHz, CDCl<sub>3</sub>)  $\delta$  5.33 (2H, s), 7.36-7.42 (3H, m), 7.53-7.58 (2H, m), 7.64 (1H, s), 7.68 (1H, brd, *J* = 7.9 Hz), 7.91 (1H, d, *J* = 7.9 Hz); <sup>13</sup>C NMR (100 MHz, CDCl<sub>3</sub>)  $\delta$  69.3, 88.1, 93.3, 122.3, 124.9, 125.0, 125.7, 128.5 (2C), 129.1, 129.5, 131.8 (2C), 132.5, 146.6, 170.4; MS (ESI-TOF) *m/z* 235 [M+H]<sup>+</sup>; HRMS calcd for C<sub>16</sub>H<sub>11</sub>O<sub>2</sub> [M+H]<sup>+</sup>, 235.0759; found, 235.0767. Anal. Calcd for C<sub>16</sub>H<sub>10</sub>O<sub>2</sub>: C, 82.04; H, 4.30. Found: C, 82.20; H, 4.25.

### 5-Phenethylisobenzofuran-1(3H)-one (**2m**)

By stirring alkynylisobenzofuranone **2j** (234.1 mg, 1.0 mmol) and 10% palladium on active carbon (50% wet, 100 mg) in EtOAc (20 mL) at room temperature for 3 h under H<sub>2</sub> atmosphere, hydrogenation completely proceeded. The reaction mixture was purified by column chromatography on silica gel (hexane/EtOAc = 5 : 1) to give 5-phenethylisobenzofuran-1(3H)-one **2m** in 95% yield (226.1 mg, 0.95 mmol). Pale yellow crystals (CHCl<sub>3</sub>); Mp. 113-115 °C; IR (ATR)  $\nu$  1744, 1616, 1597, 1046, 997, 697, 683 cm<sup>-1</sup>; <sup>1</sup>H NMR (400 MHz, CDCl<sub>3</sub>)  $\delta$  2.96 (2H, dd, *J* = 8.2, 6.0 Hz), 3.06 (2H, dd, *J* = 8.2, 6.0 Hz), 5.26 (2H, s), 7.14 (2H, d, *J* = 7.2 Hz), 7.18-7.36 (5H, m), 7.81 (1H, d, *J* = 7.8 Hz); <sup>13</sup>C NMR (100 MHz, CDCl<sub>3</sub>)  $\delta$  37.6, 38.2, 69.5, 122.0, 123.7, 125.6, 126.3, 128.4 (2C), 128.5 (2C), 129.8, 140.7, 147.1, 148.9, 171.1; MS (ESI-TOF) *m/z* 239 [M+H]<sup>+</sup>; HRMS calcd for C<sub>16</sub>H<sub>15</sub>O<sub>2</sub> [M+H]<sup>+</sup>, 239.1072; found, 239.1078.

### 3,4-Dihydro-1H-[1,4]oxazino[4,3-a]indol-1-one (**2o**)

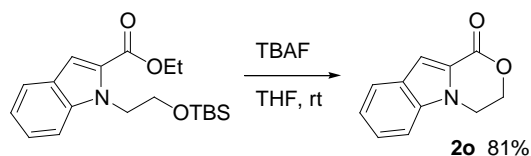

To a solution of ethyl 1-(2-(*tert*-butyldimethylsilyloxy)ethyl)-1H-indole-2-carboxylate<sup>6</sup> (3.48 g, 10 mmol) in THF (100 mL), tetrabutylammonium fluoride (1.0 M in THF, 20 mL, 20 mmol) was added at 0 °C. After being stirred for 2 h at room temperature, the reaction mixture was concentrated under reduced pressure. The resulting mixture was poured into H<sub>2</sub>O (25 mL) and extracted with EtOAc (25 mL x 3). Combined organic

layer was washed with brine (20 mL), dried over anhydrous MgSO<sub>4</sub>, and evaporated. The residue was purified by column chromatography on silica gel to give 3,4-dihydro-1*H*-[1,4]oxazino[4,3-*a*]indol-1-one **2o** in 81% yield (8.1 mmol, 1.52 g). Colorless crystals (EtOAc); Mp. 169-171 °C; IR (ATR)  $\nu$  2924, 1703, 1089, 751, 433 cm<sup>-1</sup>; <sup>1</sup>H NMR (400 MHz, CDCl<sub>3</sub>)  $\delta$  4.35 (2H, t, *J* = 5.2 Hz), 4.76 (2H, t, *J* = 5.2 Hz), 7.19-7.25 (1H, m), 7.35 (1H, d, *J* = 8.4 Hz), 7.39-7.45 (1H, m), 7.47 (1H, s), 7.75 (1H, d, *J* = 8.1 Hz); <sup>13</sup>C NMR (100 MHz, CDCl<sub>3</sub>)  $\delta$  39.9, 66.6, 109.9, 110.3, 121.5, 123.2, 123.6, 126.1, 126.9, 136.6, 159.6; MS (ESI-TOF) *m/z* 188 [M+H]<sup>+</sup>; HRMS calcd for C<sub>11</sub>H<sub>10</sub>NO<sub>2</sub> [M+H]<sup>+</sup>, 188.0712; found, 188.0717. Anal. Calcd for C<sub>11</sub>H<sub>9</sub>NO<sub>2</sub>: C, 70.58; H, 4.85; N, 7.48. Found: C, 70.66; H, 4.80; N, 7.65.

#### 4*H*-furo[3,2-*c*]chromen-4-one (**2p**)

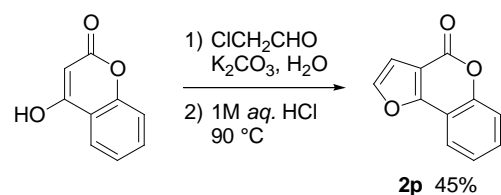

This compound was prepared by modifying the procedure reported by Majumdar.<sup>7</sup> To a mixture of K<sub>2</sub>CO<sub>3</sub> (2.76 g, 20 mmol) and 4-hydroxycoumarin (1.62 g, 10 mmol) in water (20 mL), chloroacetaldehyde (40 % in water, 2.46 mL, 15 mmol) was slowly added. After being stirred for 1.5 h at room temperature, the precipitated solid was collected by filtration. The precipitate was treated by 1 M aqueous HCl (30 mL) for 1 h at 90 °C. The reaction mixture was extracted with EtOAc (30 mL x 3) and dried over anhydrous MgSO<sub>4</sub>. The organic layer was concentrated under reduced pressure to give 4*H*-furo[3,2-*c*]chromen-4-one **2p** in 45% yield (0.84 g, 4.5 mmol). Colorless crystals (Et<sub>2</sub>O); Mp. 81.0-82.5 °C; IR (ATR)  $\nu$  1718, 959, 750, 725 cm<sup>-1</sup>; <sup>1</sup>H NMR (400 MHz, CDCl<sub>3</sub>)  $\delta$  7.01 (1H, d, *J* = 2.1 Hz), 7.34-7.39 (1H, m), 7.46 (1H, dd, *J* = 8.4, 0.7 Hz), 7.53 (1H, ddd, *J* = 8.4, 7.2, 1.4 Hz), 7.66 (1H, d, *J* = 2.1 Hz), 7.89 (1H, dd, *J* = 7.8, 1.4 Hz); <sup>13</sup>C NMR (100 MHz, CDCl<sub>3</sub>)  $\delta$  108.6, 110.6, 112.8, 117.3, 120.9, 124.5, 130.7, 144.8, 152.5, 157.6, 158.3; MS (ESI-TOF) *m/z* 187 [M+H]<sup>+</sup>; HRMS calcd for C<sub>11</sub>H<sub>7</sub>O<sub>3</sub> [M+H]<sup>+</sup>, 187.0395; found, 187.0389.

### 3. Carbon acid induced olefination reaction of lactones

#### (*Z*)-Ethyl 2-(isochroman-1-ylidene)acetate (**4aa**)

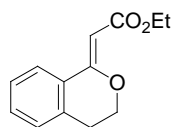

To a solution of isochroman-1-one **2a** (73.8 mg, 0.50 mmol) and carbon acid **1c** (10.1 mg, 10  $\mu$ mol) in CH<sub>2</sub>Cl<sub>2</sub> (1.0 mL), a solution of *tert*-butyl(1-ethoxyvinyloxy)dimethylsilane (202 mg, 1.00 mmol) in CH<sub>2</sub>Cl<sub>2</sub> (0.5 mL) was slowly added at 0 °C over 1 h using a syringe pump. After being stirred for additional 3 h at room temperature, the reaction mixture was concentrated under reduced pressure. The residue was directly purified by flash column chromatography on silica gel (hexane/EtOAc = 5 : 1) to give the vinyl ether **4aa** in 85% yield (91.2 mg, 0.42 mmol). Pale yellow oil; IR (ATR)  $\nu$  2979, 1707, 1618, 1150, 1126, 1090, 769 cm<sup>-1</sup>; <sup>1</sup>H NMR (400 MHz, CDCl<sub>3</sub>)  $\delta$  1.30 (3H, t, *J* = 7.2 Hz), 2.97 (2H, t, *J* = 5.7 Hz), 4.19 (2H, q, *J* = 7.2 Hz), 4.35 (2H,

t,  $J = 5.7$  Hz), 5.60 (1H, s), 7.20 (1H, brd,  $J = 7.5$  Hz), 7.26-7.31 (1H, m), 7.37 (1H, td,  $J = 7.5, 1.3$  Hz), 7.64 (1H, d,  $J = 7.5$  Hz);  $^{13}\text{C}$  NMR (100 MHz,  $\text{CDCl}_3$ )  $\delta$  14.3, 28.6, 59.2, 65.6, 92.0, 125.4, 127.2, 127.9, 128.5, 130.4, 135.6, 162.0, 165.8; MS (ESI-TOF)  $m/z$  241  $[\text{M}+\text{Na}]^+$ ; HRMS calcd for  $\text{C}_{13}\text{H}_{14}\text{NaO}_3$   $[\text{M}+\text{Na}]^+$ , 241.0841; found, 241.0837. Anal. Calcd for  $\text{C}_{13}\text{H}_{14}\text{O}_3$ : C, 71.54; H, 6.47. Found: C, 71.38; H, 6.50.

#### (Z)-Methyl 2-(isochroman-1-ylidene)acetate (4ab)

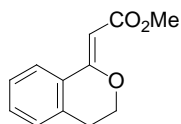

To a solution of isochroman-1-one **2a** (75.8 mg, 0.51 mmol) and carbon acid **1c** (9.8 mg, 10  $\mu\text{mol}$ ) in  $\text{CH}_2\text{Cl}_2$  (1.0 mL), a solution of *tert*-butyldimethyl(1-methoxyvinyl)oxy)silane (188 mg, 1.00 mmol) in  $\text{CH}_2\text{Cl}_2$  (0.5 mL) was slowly added at 0 °C over 1 h using a syringe pump and stirred at the same temperature for 1 h. After being stirred for additional 3 h at room temperature, the reaction mixture was concentrated under reduced pressure. The residue was directly purified by column chromatography on silica gel (hexane/EtOAc = 3 : 1) to give the vinyl ether **4ab** in 82% yield (85.6 mg, 0.40 mmol). Pale yellow oil; IR (ATR)  $\nu$  2948, 1709, 1616, 1153, 1125, 1089, 769  $\text{cm}^{-1}$ ;  $^1\text{H}$  NMR (400 MHz,  $\text{CDCl}_3$ )  $\delta$  2.92 (2H, t,  $J = 5.6$  Hz), 3.68 (3H, s), 4.30 (1H, t,  $J = 5.6$  Hz), 5.56 (1H, s), 7.15 (1H, d,  $J = 7.5$  Hz), 7.24 (1H, t,  $J = 7.5$  Hz), 7.33 (1H, t,  $J = 7.5$  Hz), 7.58 (1H, d,  $J = 7.5$  Hz);  $^{13}\text{C}$  NMR (100 MHz,  $\text{CDCl}_3$ )  $\delta$  28.5, 50.7, 65.6, 91.6, 125.4, 127.2, 127.9, 128.4, 130.5, 135.6, 162.0, 166.2; MS (ESI-TOF)  $m/z$  205  $[\text{M}+\text{H}]^+$ ; HRMS calcd for  $\text{C}_{12}\text{H}_{13}\text{O}_3$   $[\text{M}+\text{H}]^+$ , 205.0865; found, 205.0864.

#### (Z)-Ethyl 2-(isobenzofuran-1(3H)-ylidene)acetate (4ba)

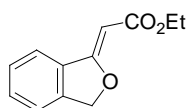

To a solution of isobenzofuran-1(3H)-one **2b** (68.0 mg, 0.51 mmol) and carbon acid **1c** (9.9 mg, 10  $\mu\text{mol}$ ) in  $\text{CH}_2\text{Cl}_2$  (1.0 mL), a solution of *tert*-butyl(1-ethoxyvinyl)oxy)dimethylsilane (201 mg, 1.00 mmol) in  $\text{CH}_2\text{Cl}_2$  (0.5 mL) was slowly added at 0 °C over 1 h using a syringe pump and stirred at the same temperature for 1 h. After being stirred for additional 3 h at room temperature, the reaction mixture was concentrated under reduced pressure. The residue was directly purified by flash column chromatography on silica gel (hexane/EtOAc = 3 : 1) to give the vinyl ether **4ba** in 83% yield (85.9 mg, 0.42 mmol). The structure of the product was also confirmed by comparison of  $^1\text{H}$  and  $^{13}\text{C}$  NMR spectra in the literature.<sup>8</sup> Pale yellow oil; IR (ATR)  $\nu$  2980, 1702, 1635, 1146, 1065, 767  $\text{cm}^{-1}$ ;  $^1\text{H}$  NMR (400 MHz,  $\text{CDCl}_3$ )  $\delta$  1.29 (3H, t,  $J = 7.1$  Hz), 4.20 (2H, q,  $J = 7.1$  Hz), 5.50 (1H, s), 5.55 (2H, s), 7.36-7.41 (2H, m), 7.44-7.50 (1H, m), 7.56 (1H, d,  $J = 8.2$  Hz);  $^{13}\text{C}$  NMR (100 MHz,  $\text{CDCl}_3$ )  $\delta$  14.4, 59.4, 76.5, 86.0, 121.2, 121.4, 128.4, 131.1, 132.9, 141.3, 166.2, 167.9; MS (ESI-TOF)  $m/z$  227  $[\text{M}+\text{Na}]^+$ ; HRMS calcd for  $\text{C}_{12}\text{H}_{12}\text{NaO}_3$   $[\text{M}+\text{Na}]^+$ , 227.0680; found, 227.0684. Anal. Calcd for  $\text{C}_{12}\text{H}_{12}\text{O}_3$ : C, 70.57; H, 5.92. Found: C, 70.68; H, 5.70.

#### (Z)-Isopropyl 2-(isobenzofuran-1(3H)-ylidene)acetate (4bc)

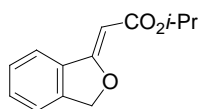

To a solution of isobenzofuran-1(3*H*)-one **1b** (67.2 mg, 0.50 mmol) and carbon acid **1c** (10.0 mg, 10  $\mu$ mol) in  $\text{CH}_2\text{Cl}_2$  (1.0 mL), a solution of *tert*-butyl(1-isopropoxyvinyl)oxydimethylsilane (218 mg, 1.00 mmol) in  $\text{CH}_2\text{Cl}_2$  (0.5 mL) was slowly added at 0 °C over 1 h using a syringe pump and stirred at the same temperature for 1 h. After being stirred for additional 4 h at room temperature, the reaction mixture was concentrated under reduced pressure. The residue was directly purified by flash column chromatography on silica gel (hexane/EtOAc = 3 : 1) to give the vinyl ether **4bc** in 78% yield (85.1 mg, 0.39 mmol). Pale yellow oil; IR (ATR)  $\nu$  2981, 1732, 1102, 736  $\text{cm}^{-1}$ ;  $^1\text{H}$  NMR (400 MHz,  $\text{CDCl}_3$ )  $\delta$  1.29 (3H, t,  $J$  = 7.1 Hz), 4.20 (2H, q,  $J$  = 7.1 Hz), 5.50 (1H, s), 5.55 (2H, s), 7.36-7.41 (2H, m), 7.44-7.50 (1H, m), 7.56 (1H, d,  $J$  = 8.2 Hz);  $^{13}\text{C}$  NMR (100 MHz,  $\text{CDCl}_3$ )  $\delta$  14.4, 59.4, 76.5, 86.0, 121.2, 121.4, 128.4, 131.1, 132.9, 141.3, 166.2, 167.9; MS (ESI-TOF)  $m/z$  241  $[\text{M}+\text{Na}]^+$ ; HRMS calcd for  $\text{C}_{13}\text{H}_{14}\text{NaO}_3$   $[\text{M}+\text{Na}]^+$ , 241.0841; found, 241.0850. Anal. Calcd for  $\text{C}_{13}\text{H}_{14}\text{O}_3$ : C, 71.54; H, 6.47. Found: C, 71.24; H, 6.30.

#### (*Z*)-Isopropyl 2-(7-nitroisochroman-1-ylidene)acetate (**4cc**)

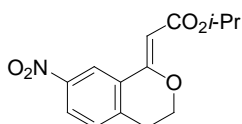

To a solution of 7-nitroisochroman-1-one **2c** (47.6 mg, 0.25 mmol) and carbon acid **1c** (4.8 mg, 5  $\mu$ mol) in  $\text{CH}_2\text{Cl}_2$  (0.75 mL), a solution of *tert*-butyl(1-isopropoxyvinyl)oxydimethylsilane (108 mg, 0.50 mmol) in  $\text{CH}_2\text{Cl}_2$  (0.5 mL) was slowly added at 0 °C over 1 h using a syringe pump and stirred at the same temperature for 1 h. After being stirred for additional 5 h at room temperature, the reaction mixture was concentrated under reduced pressure. The residue was directly purified by column chromatography on silica gel (hexane/EtOAc = 1 : 1) to give the vinyl ether **4cc** in 83% yield (57.0 mg, 0.21 mmol). Colorless crystals ( $\text{CHCl}_3$ ); Mp. 85.5-88.0 °C; IR (ATR)  $\nu$  2982, 1703, 1620, 1518, 1342, 1104, 809, 793, 741  $\text{cm}^{-1}$ ;  $^1\text{H}$  NMR (400 MHz,  $\text{CDCl}_3$ )  $\delta$  1.26 (6H, d,  $J$  = 6.2 Hz), 3.06 (2H, t,  $J$  = 5.7 Hz), 4.35 (2H, t,  $J$  = 5.7 Hz), 5.07 (1H, sept,  $J$  = 6.2 Hz), 5.68 (1H, s), 7.39 (1H, d,  $J$  = 8.4 Hz), 8.17 (1H, dd,  $J$  = 8.4, 2.1 Hz), 8.49 (1H, d,  $J$  = 2.1 Hz);  $^{13}\text{C}$  NMR (100 MHz,  $\text{CDCl}_3$ )  $\delta$  21.9 (2C), 28.9, 65.0, 66.8, 95.1, 120.5, 124.5, 129.4, 130.0, 142.3, 147.3, 159.2, 164.6; MS (ESI-TOF)  $m/z$  278  $[\text{M}+\text{H}]^+$ ; HRMS calcd for  $\text{C}_{14}\text{H}_{16}\text{NO}_5$   $[\text{M}+\text{H}]^+$ , 278.1028; found, 278.1037. Anal. Calcd for  $\text{C}_{14}\text{H}_{15}\text{NO}_5$ : C, 60.64; H, 5.45; N, 5.05. Found: C, 60.60; H, 5.49; N, 5.15.

#### (*Z*)-Isopropyl 2-(7-bromoisochroman-1-ylidene)acetate (**4dc**)

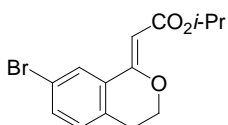

To a solution of 7-bromoisochroman-1-one **2d** (113.4 mg, 0.50 mmol) and carbon acid **1c** (10.1 mg, 10  $\mu$ mol) in  $\text{CH}_2\text{Cl}_2$  (1.0 mL), a solution of *tert*-butyl(1-isopropoxyvinyl)oxydimethylsilane (216 mg, 1.0 mmol) in  $\text{CH}_2\text{Cl}_2$  (0.5 mL) was slowly added at 0 °C over 1 h using a syringe pump and stirred at the same temperature

for 1 h. After being stirred for additional 6 h at room temperature, the reaction mixture was concentrated under reduced pressure. The residue was directly purified by column chromatography on silica gel (hexane/EtOAc = 2 : 1) to give the vinyl ether **4dc** in 84% yield (129.9 mg, 0.42 mmol). Colorless crystals (EtOAc); Mp. 98.5-99.5 °C; IR (ATR)  $\nu$  2982, 1698, 1612, 1161, 1091, 808  $\text{cm}^{-1}$ ;  $^1\text{H}$  NMR (400 MHz,  $\text{CDCl}_3$ )  $\delta$  1.23 (6H, d,  $J = 6.2$  Hz), 2.87 (2H, t,  $J = 5.6$  Hz), 4.27 (2H, t,  $J = 5.6$  Hz), 5.03 (1H, sept,  $J = 6.2$  Hz), 5.49 (1H, s), 7.03 (1H, d,  $J = 8.1$  Hz), 7.41 (1H, d,  $J = 8.1$  Hz), 7.72 (1H, s);  $^{13}\text{C}$  NMR (100 MHz,  $\text{CDCl}_3$ )  $\delta$  21.9, 28.1, 65.4, 66.4, 93.6, 120.7, 128.1, 129.6, 130.4, 133.1, 134.4, 160.1, 164.9; MS (ESI-TOF)  $m/z$  311  $[\text{M}+\text{H}]^+$ , 313  $[\text{M}+2+\text{H}]^+$ ; HRMS calcd for  $\text{C}_{14}\text{H}_{16}\text{BrO}_3$   $[\text{M}+\text{H}]^+$ , 311.0283; found, 311.0292. Anal. Calcd for  $\text{C}_{14}\text{H}_{15}\text{BrO}_3$ : C, 54.04; H, 4.86. Found: C, 54.32; H, 4.71.

#### (Z)-Ethyl 2-(7-acetamidoisochroman-1-ylidene)acetate (**4ea**)

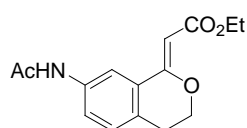

To a solution of *N*-(1-oxoisochroman-7-yl)acetamide **2e** (51.1 mg, 0.25 mmol) and carbon acid **1c** (5.1 mg, 5  $\mu\text{mol}$ ) in  $\text{CH}_2\text{Cl}_2$  (1.0 mL), a solution of *tert*-butyl(1-ethoxyvinyl)oxydimethylsilane (152 mg, 0.75 mmol) in  $\text{CH}_2\text{Cl}_2$  (0.5 mL) was slowly added at 0 °C over 1 h using a syringe pump and stirred at the same temperature for 1 h. After being stirred for additional 4 h at room temperature, the reaction mixture was concentrated under reduced pressure. The residue was directly purified by column chromatography on silica gel ( $\text{CHCl}_3/\text{MeOH} = 10 : 1$ ) to give the vinyl ether **4ea** in 87% yield (59.9 mg, 0.22 mmol). Colorless crystals ( $\text{CHCl}_3$ ); Mp. 140-142 °C; IR (ATR)  $\nu$  3262, 2976, 1705, 1656, 1605, 1581, 1150, 1091, 798  $\text{cm}^{-1}$ ;  $^1\text{H}$  NMR (400 MHz,  $\text{CDCl}_3$ )  $\delta$  1.24 (3H, t,  $J = 7.1$  Hz), 2.15 (3H, s), 2.81 (2H, t,  $J = 5.6$  Hz), 4.13 (2H, q,  $J = 7.1$  Hz), 4.13-4.17 (2H, m), 7.05 (1H, d,  $J = 8.2$  Hz), 7.53 (1H, dd,  $J = 8.2, 1.8$  Hz), 7.87 (1H, d,  $J = 1.8$  Hz), 8.68 (1H, br, NH);  $^{13}\text{C}$  NMR (100 MHz,  $\text{CDCl}_3$ )  $\delta$  14.3, 24.2, 28.0, 59.4, 65.6, 92.2, 116.7, 122.6, 128.4, 128.6, 131.6, 137.6, 162.0, 166.3, 169.1; MS (ESI-TOF)  $m/z$  276  $[\text{M}+\text{H}]^+$ ; HRMS calcd for  $\text{C}_{15}\text{H}_{18}\text{NO}_4$   $[\text{M}+\text{H}]^+$ , 276.1236; found, 276.1230.

#### (Z)-Ethyl 2-(6*H*-benzo[*c*]chromen-6-ylidene)acetate (**4fa**)

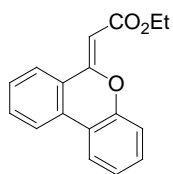

To a solution of 6*H*-benzo[*c*]chromen-6-one **2f** (98.5 mg, 0.50 mmol) and carbon acid **1c** (9.9 mg, 10  $\mu\text{mol}$ ) in  $\text{CH}_2\text{Cl}_2$  (0.75 mL), a solution of *tert*-butyl(1-ethoxyvinyl)oxydimethylsilane (201 mg, 1.00 mmol) in  $\text{CH}_2\text{Cl}_2$  (0.5 mL) was slowly added at 0 °C over 1 h using a syringe pump and stirred at the same temperature for 1 h. After being stirred for additional 8 h at room temperature, the reaction mixture was concentrated under reduced pressure. The residue was directly purified by column chromatography on alumina (hexane/EtOAc = 5 : 1) to give the vinyl ether **4fa** in 85% yield (113.6 mg, 0.43 mmol). Pale yellow oil; IR (ATR)  $\nu$  2970, 1695, 1627, 1588, 1277, 1143, 1107, 746  $\text{cm}^{-1}$ ;  $^1\text{H}$  NMR (400 MHz,  $\text{CDCl}_3$ )  $\delta$  1.36 (3H, t,  $J = 7.1$  Hz), 4.25 (2H, q,  $J =$



7.1 Hz), 5.85 (1H, s), 7.15-7.21 (1H, m), 7.29-7.42 (3H, m), 7.53-7.59 (1H, m), 7.78 (1H, dd,  $J = 8.1, 1.0$  Hz), 7.88 (1H, dd,  $J = 7.9, 1.4$  Hz), 7.96 (1H, brd,  $J = 8.0$  Hz);  $^{13}\text{C}$  NMR (100 MHz,  $\text{CDCl}_3$ )  $\delta$  14.5, 59.5, 91.3, 117.4, 118.3, 121.9, 122.2, 123.6, 124.3, 124.8, 128.8, 129.4, 130.1, 131.8, 150.6, 158.8, 165.4; MS (ESI-TOF)  $m/z$  267  $[\text{M}+\text{H}]^+$ ; HRMS calcd for  $\text{C}_{17}\text{H}_{15}\text{O}_3$   $[\text{M}+\text{H}]^+$ , 267.1021; found, 267.1024. Anal. Calcd for  $\text{C}_{17}\text{H}_{14}\text{O}_3$ : C, 76.68; H, 5.30;. Found: C, 76.38; H, 5.27.

**(Z)-Ethyl 2-(6-bromoisobenzofuran-1(3H)-ylidene)acetate (4ga)**

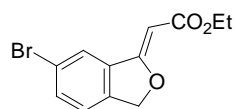

To a solution of 6-bromoisobenzofuran-1(3H)-one **2g** (105.5 mg, 0.50 mmol) and carbon acid **1c** (9.9 mg, 10  $\mu\text{mol}$ ) in  $\text{CH}_2\text{Cl}_2$  (1.0 mL), a solution of *tert*-butyl(1-ethoxyvinyl)oxydimethylsilane (202 mg, 1.00 mmol) in  $\text{CH}_2\text{Cl}_2$  (0.5 mL) was slowly added at 0 °C over 1 h using a syringe pump and stirred for 1 h at the same temperature. After being stirred for additional 7 h at room temperature, the reaction mixture was concentrated under reduced pressure. The residue was directly purified by column chromatography on silica gel (hexane/EtOAc = 5 : 1) to give the vinyl ether **4ga** in 72% yield (101.7 mg, 0.36 mmol). Colorless crystals (EtOAc); Mp. 105-107 °C; IR (ATR)  $\nu$  1701, 1639, 1154, 1078, 796  $\text{cm}^{-1}$ ;  $^1\text{H}$  NMR (400 MHz,  $\text{CDCl}_3$ )  $\delta$  1.30 (3H, t,  $J = 7.1$  Hz), 4.21 (2H, q,  $J = 7.1$  Hz), 5.48 (1H, s), 5.51 (2H, s), 7.28 (1H, d,  $J = 8.1$  Hz), 7.59 (1H, brd,  $J = 8.1$  Hz), 7.70 (1H, s);  $^{13}\text{C}$  NMR (100 MHz,  $\text{CDCl}_3$ )  $\delta$  14.4, 59.7, 76.3, 87.2, 122.5, 122.9, 124.5, 134.3, 135.2, 140.1, 165.9, 166.3; MS (ESI-TOF)  $m/z$  283  $[\text{M}+\text{H}]^+$ , 285  $[\text{M}+2+\text{H}]^+$ ; HRMS calcd for  $\text{C}_{12}\text{H}_{12}\text{BrO}_3$   $[\text{M}+\text{H}]^+$ , 282.9970; found, 282.9974. Anal. Calcd for  $\text{C}_{12}\text{H}_{11}\text{BrO}_3$ : C, 50.91; H, 3.92. Found: C, 50.77; H, 3.88.

**(Z)-Ethyl 2-(5-bromoisobenzofuran-1(3H)-ylidene)acetate (4ha)**

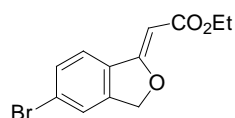

To a solution of 5-bromoisobenzofuran-1(3H)-one **2h** (104.5 mg, 0.49 mmol) and carbon acid **1c** (10.1 mg, 10  $\mu\text{mol}$ ) in  $\text{CH}_2\text{Cl}_2$  (1.0 mL), a solution of *tert*-butyl(1-ethoxyvinyl)oxydimethylsilane (200 mg, 1.00 mmol) in  $\text{CH}_2\text{Cl}_2$  (0.5 mL) was slowly added at 0 °C over 1 h using a syringe pump and stirred for 1 h at the same temperature. After being stirred for additional 7 h at room temperature, the reaction mixture was concentrated under reduced pressure. The residue was directly purified by column chromatography on silica gel (hexane/EtOAc = 5 : 1) to give the vinyl ether **4ha** in 75% yield (104.0 mg, 0.37 mmol). Colorless crystals (EtOAc); Mp. 121-124 °C; IR (ATR)  $\nu$  1709, 1654, 1145, 1059, 789  $\text{cm}^{-1}$ ;  $^1\text{H}$  NMR (400 MHz,  $\text{CDCl}_3$ )  $\delta$  1.30 (3H, t,  $J = 7.1$  Hz), 4.21 (2H, q,  $J = 7.1$  Hz), 5.49 (1H, s), 5.54 (2H, s), 7.43 (1H, d,  $J = 8.2$  Hz), 7.51-7.59 (2H, m);  $^{13}\text{C}$  NMR (100 MHz,  $\text{CDCl}_3$ )  $\delta$  14.4, 59.6, 75.8, 86.7, 122.67, 124.8, 125.7, 132.0, 132.1, 143.1, 166.0, 166.8; MS (ESI-TOF)  $m/z$  305  $[\text{M}+\text{Na}]^+$ , 307  $[\text{M}+2+\text{Na}]^+$ ; HRMS calcd for  $\text{C}_{12}\text{H}_{11}\text{BrNaO}_3$   $[\text{M}+\text{Na}]^+$ , 304.9789; found, 304.9790.

**(Z)-Ethyl 2-(7-((trimethylsilyl)ethynyl)isochroman-1-ylidene)acetate (4ia)**

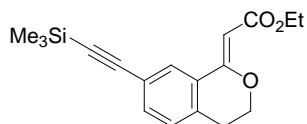

To a solution of 7-((trimethylsilyl)ethynyl)isochroman-1-one **2i** (60.7 mg, 0.25 mmol) and carbon acid **1c** (4.9 mg, 5  $\mu$ mol) in  $\text{CH}_2\text{Cl}_2$  (1.0 mL), a solution of *tert*-butyldimethyl(1-ethoxyvinyl)oxy)silane (102 mg, 0.50 mmol) in  $\text{CH}_2\text{Cl}_2$  (0.5 mL) was slowly added at 0 °C over 1 h using a syringe pump and stirred for 1 h at the same temperature. After being stirred for additional 5 h at room temperature, the reaction mixture was concentrated under reduced pressure. The residue was directly purified by column chromatography on silica gel (hexane/EtOAc = 5 : 1) to give the vinyl ether **4ia** in 70% yield (54.4 mg, 0.17 mmol). Colorless crystals ( $\text{Et}_2\text{O}$ ); Mp. 90.5-93.0 °C; IR (ATR)  $\nu$  2956, 2160, 1703, 1616, 1601, 1149, 1084, 838  $\text{cm}^{-1}$ ;  $^1\text{H}$  NMR (400 MHz,  $\text{CDCl}_3$ )  $\delta$  -0.26 (9H, s), 1.29 (3H, t,  $J = 7.1$  Hz), 2.95 (2H, t,  $J = 5.5$  Hz), 4.18 (2H, q,  $J = 7.1$  Hz), 4.32 (2H, t,  $J = 5.5$  Hz), 5.61 (1H, s), 7.13 (1H, d,  $J = 7.8$  Hz), 7.43 (1H, d,  $J = 7.8$  Hz), 7.76 (1H, s);  $^{13}\text{C}$  NMR (100 MHz,  $\text{CDCl}_3$ )  $\delta$  -0.2 (3C), 14.4, 28.6, 59.4, 65.5, 92.8, 95.0, 103.8, 122.4, 128.1, 128.7, 129.0, 133.5, 135.9, 161.1, 165.7; MS (ESI-TOF)  $m/z$  315  $[\text{M}+\text{H}]^+$ ; HRMS calcd for  $\text{C}_{18}\text{H}_{23}\text{O}_3\text{Si}$   $[\text{M}+\text{H}]^+$ , 315.1416; found, 315.1430. Anal. Calcd for  $\text{C}_{18}\text{H}_{22}\text{O}_3\text{Si}$ : C, 68.75; H, 7.05. Found: C, 68.99; H, 7.26.

**(Z)-Ethyl 2-(5-(phenylethynyl)isobenzofuran-1(3H)-ylidene)acetate (4ja)**

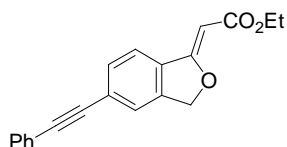

To a solution of 5-(phenylethynyl)isobenzofuran-1(3H)-one **2j** (58.7 mg, 0.25 mmol) and carbon acid **1c** (5.1 mg, 5  $\mu$ mol) in  $\text{CH}_2\text{Cl}_2$  (1.0 mL), a solution of *tert*-butyldimethyl(1-ethoxyvinyl)oxy)silane (101 mg, 0.50 mmol) in  $\text{CH}_2\text{Cl}_2$  (0.5 mL) was slowly added at 0 °C over 1 h using a syringe pump and stirred for 1 h at the same temperature. After being stirred for additional 7 h at room temperature, the reaction mixture was concentrated under reduced pressure. The residue was directly purified by column chromatography on silica gel (hexane/EtOAc = 5 : 1) to give the vinyl ether **4ja** in 70% yield (53.1 mg, 0.17 mmol). Colorless crystals ( $\text{Et}_2\text{O}$ ); Mp. 143-146 °C; IR (ATR)  $\nu$  1706, 1650, 1153, 1143, 1066, 794, 757, 689  $\text{cm}^{-1}$ ;  $^1\text{H}$  NMR (400 MHz,  $\text{CDCl}_3$ )  $\delta$  1.31 (3H, t,  $J = 7.1$  Hz), 4.22 (2H, q,  $J = 7.1$  Hz), 5.52 (1H, s), 5.55 (2H, s), 7.32-7.40 (3H, m), 7.50-7.59 (5H, m);  $^{13}\text{C}$  NMR (100 MHz,  $\text{CDCl}_3$ )  $\delta$  14.4, 59.6, 76.2, 86.8, 88.5, 92.1, 121.3, 122.5, 124.2, 126.5, 128.4, 128.8, 131.7, 131.9, 132.6, 141.4, 166.1, 167.2; MS (ESI-TOF)  $m/z$  327  $[\text{M}+\text{Na}]^+$ ; HRMS calcd for  $\text{C}_{20}\text{H}_{16}\text{NaO}_3$   $[\text{M}+\text{Na}]^+$ , 327.0997; found, 327.1011. Anal. Calcd for  $\text{C}_{20}\text{H}_{16}\text{O}_3$ : C, 78.93; H, 5.30. Found: C, 78.60; H, 5.49.

**(Z)-Methyl 2-(7-(2-(trimethylsilyl)ethyl)isochroman-1-ylidene)acetate (4kb)**

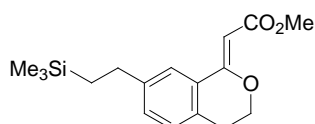

To a solution of 7-(2-(trimethylsilyl)ethyl)isochroman-1-one **2k** (63.2 mg, 0.25 mmol) and carbon acid **1c** (5.0

mg, 5  $\mu$ mol) in  $\text{CH}_2\text{Cl}_2$  (0.5 mL), a solution of *tert*-butyldimethyl(1-methoxyvinyl)oxy)silane (94 mg, 0.50 mmol) in  $\text{CH}_2\text{Cl}_2$  (0.5 mL) was slowly added at 0 °C over 1 h using a syringe pump and stirred for 1 h at the same temperature. After being stirred for additional 5 h at room temperature, the reaction mixture was concentrated under reduced pressure. The residue was directly purified by column chromatography on silica gel (hexane/EtOAc = 5 : 1) to give the vinyl ether **4kb** in 72% yield (55.8 mg, 0.18 mmol). Colorless oil; IR (ATR)  $\nu$  2949, 1715, 1622, 1604, 1246, 1152, 1091, 830  $\text{cm}^{-1}$ ;  $^1\text{H}$  NMR (400 MHz,  $\text{CDCl}_3$ )  $\delta$  0.02 (9H, s), 0.81-0.88 (2H, m), 2.57-2.64 (2H, m), 2.92 (2H, t,  $J = 5.6$  Hz), 3.72 (2H, s), 4.32 (2H, t,  $J = 5.6$  Hz), 5.60 (1H, s), 7.09 (1H, d,  $J = 7.8$  Hz), 7.21 (1H, brd,  $J = 7.8$  Hz), 7.46 (1H, s);  $^{13}\text{C}$  NMR (100 MHz,  $\text{CDCl}_3$ )  $\delta$  0.0, 20.5, 30.1, 31.6, 52.6, 67.7, 93.2, 126.4, 129.7, 130.1, 132.2, 134.7, 146.3, 164.3, 168.2; MS (ESI-TOF)  $m/z$  305  $[\text{M}+\text{H}]^+$ ; HRMS calcd for  $\text{C}_{17}\text{H}_{25}\text{O}_3\text{Si}$   $[\text{M}+\text{H}]^+$ , 305.1573; found, 305.1581.

#### (Z)-Ethyl 2-(5-phenethylisobenzofuran-1(3H)-ylidene)acetate (**4ma**)

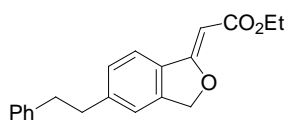

To a solution of 5-phenethylisobenzofuran-1(3H)-one **2m** (59.7 mg, 0.25 mmol) and carbon acid **1c** (5.0 mg, 5  $\mu$ mol) in chloroform (1.5 mL), a solution of *tert*-butyl(1-ethoxyvinyl)oxy)dimethylsilane (101 mg, 0.50 mmol) in chloroform (0.5 mL) was slowly added at 0 °C over 1 h using a syringe pump and stirred at the same temperature for 1 h. After being stirred for additional 8 h at room temperature, the reaction mixture was concentrated under reduced pressure. The residue was directly purified by column chromatography on silica gel (hexane/EtOAc = 5 : 1) to give the vinyl ether **4ma** in 63% yield (48.6 mg, 0.16 mmol). Colorless oil; IR (ATR)  $\nu$  2935, 1695, 1624, 1153, 1063, 793  $\text{cm}^{-1}$ ;  $^1\text{H}$  NMR (400 MHz,  $\text{CDCl}_3$ )  $\delta$  1.32 (3H, t,  $J = 7.1$  Hz), 2.90-2.96 (2H, m), 2.97-3.04 (2H, m), 4.22 (2H, q,  $J = 7.1$  Hz), 5.48 (1H, s), 5.52 (2H, s), 7.11-7.18 (3H, m), 7.19-7.23 (2H, m), 7.28 (2H, t,  $J = 7.0$  Hz), 7.48 (1H, d,  $J = 8.0$  Hz);  $^{13}\text{C}$  NMR (100 MHz,  $\text{CDCl}_3$ )  $\delta$  14.5, 37.6, 38.0, 59.4, 76.4, 85.5, 121.2, 121.3, 126.2, 128.4 (4C), 129.1, 131.0, 140.9, 141.8, 145.9, 166.4, 168.2; MS (ESI-TOF)  $m/z$  309  $[\text{M}+\text{H}]^+$ ; HRMS calcd for  $\text{C}_{20}\text{H}_{21}\text{O}_3$   $[\text{M}+\text{H}]^+$ , 309.1491; found, 304.1498.

#### (Z)-Methyl 2-(3-phenyl-1H-isochromen-1-ylidene)acetate (**4nb**)

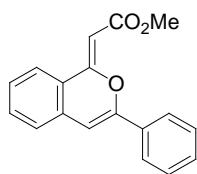

To a solution of 3-phenyl-1H-isochromen-1-one **2n** (108.7 mg, 0.49 mmol) and carbon acid **1c** (9.9 mg, 10  $\mu$ mol) in  $\text{CH}_2\text{Cl}_2$  (0.75 mL), a solution of *tert*-butyldimethyl(1-methoxyvinyl)oxy)silane (188 mg, 1.00 mmol) in  $\text{CH}_2\text{Cl}_2$  (0.50 mL) was slowly added at 0 °C over 1 h using a syringe pump and stirred at the same temperature for 1 h. After being stirred for additional 8 h at room temperature, the reaction mixture was concentrated under reduced pressure. The residue was directly purified by column chromatography on alumina (hexane/EtOAc = 5 : 1) to give the vinyl ether **4nb** in 81% yield (110.2 mg, 0.40 mmol). Colorless oil; IR (ATR)  $\nu$  2946, 1702, 1649, 1590, 1271, 1148, 1127, 1093, 761, 688  $\text{cm}^{-1}$ ;  $^1\text{H}$  NMR (400 MHz,  $\text{CDCl}_3$ )  $\delta$  3.81 (3H, s), 5.82

(1H, s), 6.68 (1H, s), 7.23-7.34 (2H, m), 7.37-7.51 (4H, m), 7.67-7.72 (1H, m), 8.09 (2H, d,  $J = 7.5$  Hz);  $^{13}\text{C}$  NMR (100 MHz,  $\text{CDCl}_3$ )  $\delta$  50.8, 88.8, 100.4 (2C), 123.2, 123.9, 125.0 (2C), 126.2, 128.0, 128.7 (2C), 129.6, 132.0, 132.1, 151.6, 160.4, 166.0; MS (ESI-TOF)  $m/z$  279  $[\text{M}+\text{H}]^+$ ; HRMS calcd for  $\text{C}_{18}\text{H}_{15}\text{O}_3$   $[\text{M}+\text{H}]^+$ , 279.1021; found, 279.1022.

**(Z)-Ethyl 2-(3,4-dihydro-1H-[1,4]oxazino[4,3-a]indol-1-ylidene)acetate (4oa)**

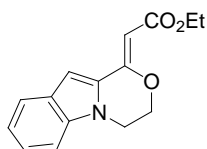

To a solution of 3,4-dihydro-1H-[1,4]oxazino[4,3-a]indol-1-one **2o** (93.5 mg, 0.50 mmol) and carbon acid **1c** (10.1 mg, 10  $\mu\text{mol}$ ) in  $\text{CH}_2\text{Cl}_2$  (1.5 mL), a solution of *tert*-butyldimethyl(1-ethoxyvinyl)oxy)silane (202 mg, 1.00 mmol) in  $\text{CH}_2\text{Cl}_2$  (0.5 mL) was slowly added at 0 °C over 1 h using a syringe pump and stirred for 1 h at the same temperature. After being stirred for additional 4 h at room temperature, the reaction mixture was concentrated under reduced pressure. The residue was directly purified by column chromatography on silica gel (hexane/EtOAc = 1 : 1) to give the vinyl ether **4oa** in 90% yield (116.7 mg, 0.45 mmol). Pale yellow crystals (EtOAc); Mp. 85.5-87.0 °C; IR (ATR)  $\nu$  2980, 1686, 1613, 1140, 1087, 734  $\text{cm}^{-1}$ ;  $^1\text{H}$  NMR (400 MHz,  $\text{CDCl}_3$ )  $\delta$  1.31 (3H, t,  $J = 7.1$  Hz), 4.17-4.27 (2H, m), 4.19 (2H, q,  $J = 7.1$  Hz), 4.50 (2H, t,  $J = 5.0$  Hz), 5.71 (1H, s), 6.91 (1H, s), 7.10-7.19 (1H, m), 7.23-7.30 (2H, m), 7.62 (1H, d,  $J = 8.0$  Hz);  $^{13}\text{C}$  NMR (100 MHz,  $\text{CDCl}_3$ )  $\delta$  143, 40.2, 59.4, 65.6, 93.0, 101.6, 108.8, 120.9, 121.7, 123.8, 127.2, 127.3, 136.4, 156.3, 165.3; MS (ESI-TOF)  $m/z$  258  $[\text{M}+\text{H}]^+$ ; HRMS calcd for  $\text{C}_{15}\text{H}_{16}\text{NO}_3$   $[\text{M}+\text{H}]^+$ , 258.1130; found, 258.1133.

**(Z)-Ethyl 2-(4H-furo[3,2-c]chromen-4-ylidene)acetate (4pa)**

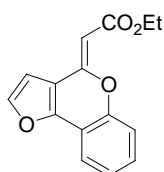

To a solution of 4H-furo[3,2-c]chromen-4-one **2p** (93.2 mg, 0.50 mmol) and carbon acid **1c** (10.0 mg, 10  $\mu\text{mol}$ ) in  $\text{CH}_2\text{Cl}_2$  (1.0 mL), a solution of *tert*-butyldimethyl(1-ethoxyvinyl)oxy)silane (202 mg, 1.00 mmol) in  $\text{CH}_2\text{Cl}_2$  (0.5 mL) was slowly added at 0 °C over 1 h using a syringe pump and stirred for 1 h at the same temperature. After being stirred for additional 9 h at room temperature, the reaction mixture was concentrated under reduced pressure. The residue was directly purified by column chromatography on alumina (hexane/EtOAc = 10 : 1) to give the vinyl ether **4pa** in 75% yield (88.9 mg, 0.37 mmol). Yellow crystals (EtOAc-hexane); Mp. 94.5-95.5 °C; IR (ATR)  $\nu$  3158, 2973, 1704, 1630, 1584, 1159, 739  $\text{cm}^{-1}$ ;  $^1\text{H}$  NMR (400 MHz,  $\text{CDCl}_3$ )  $\delta$  1.33 (3H, t,  $J = 7.2$  Hz), 4.22 (2H, q,  $J = 7.2$  Hz), 5.53 (1H, s), 6.60 (1H, d,  $J = 2.0$  Hz), 7.16-7.21 (1H, m), 7.34-7.40 (2H, m), 7.52 (1H, d,  $J = 2.0$  Hz), 7.63 (1H, brd,  $J = 8.2$  Hz);  $^{13}\text{C}$  NMR (100 MHz,  $\text{CDCl}_3$ )  $\delta$  14.5, 59.3, 88.8, 106.5, 113.9, 114.0, 117.0, 119.9, 123.9, 129.9, 144.6, 150.2, 152.3, 156.9, 165.4; MS (ESI-TOF)  $m/z$  257  $[\text{M}+\text{H}]^+$ ; HRMS calcd for  $\text{C}_{15}\text{H}_{13}\text{O}_4$   $[\text{M}+\text{H}]^+$ , 257.0814; found, 257.0806.

#### 4. Preparation of Mukaiyama aldol products

##### Ethyl 2-(2-(*tert*-butyldimethylsilyloxy)tetrahydro-2*H*-pyran-2-yl)acetate

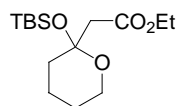

To a solution of  $\delta$ -valerolactone (50.1 mg, 0.50 mmol) and carbon acid **1c** (5.0 mg, 5  $\mu$ mol) in  $\text{CH}_2\text{Cl}_2$  (0.5 mL), a solution of *tert*-butyl(1-ethoxyvinyl)oxydimethylsilane (122 mg, 0.60 mmol) in  $\text{CH}_2\text{Cl}_2$  (0.5 mL) was slowly added at  $-78^\circ\text{C}$  over 1 h using a syringe pump. After being stirred at the same temperature for 1 h, the reaction mixture was quenched with saturated  $\text{NaHCO}_3$  aqueous solution (20 mL) and extracted with  $\text{Et}_2\text{O}$  (20 mL x 3). The combined organic layer was dried over anhydrous  $\text{Na}_2\text{SO}_4$  and concentrated under reduced pressure. Chromatographic purification of the resulting residue using silica gel (hexane/ $\text{EtOAc}$  = 50 : 1) gave the Mukaiyama aldol adduct in 71% yield (107.5 mg, 0.43 mmol). Colorless oil; IR (neat)  $\nu$  2936, 2857, 1741, 1017, 837, 778  $\text{cm}^{-1}$ ;  $^1\text{H}$  NMR (400 MHz,  $\text{CDCl}_3$ )  $\delta$  0.12 (3H, s), 0.15 (3H, s), 0.90 (9H, s), 1.25 (3H, t,  $J$  = 7.1 Hz), 1.40-1.62 (3H, m), 1.67-1.94 (3H, m), 2.57 (1H, d,  $J$  = 13.6 Hz), 2.70 (1H, d,  $J$  = 13.6 Hz), 3.57-3.66 (1H, m), 3.86 (1H, td,  $J$  = 11.2, 3.9 Hz), 4.13 (1H, q,  $J$  = 7.1 Hz);  $^{13}\text{C}$  NMR (100 MHz,  $\text{CDCl}_3$ )  $\delta$   $-2.9$  and  $-2.6$ , 14.2, 18.3, 19.2, 25.0, 25.9 (3C), 35.0, 47.1, 60.3, 62.0, 97.0, 169.7; MS (ESI-TOF)  $m/z$  325  $[\text{M}+\text{Na}]^+$ ; HRMS calcd for  $\text{C}_{15}\text{H}_{30}\text{NaO}_4\text{Si}$   $[\text{M}+\text{Na}]^+$ , 325.1811; found, 325.1810. Anal. Calcd for  $\text{C}_{15}\text{H}_{30}\text{O}_4\text{Si}$ : C, 59.56; H, 10.00. Found: C, 59.71; H, 9.76.

##### Isopropyl 2-(7-bromo-1-(*tert*-butyldimethylsilyloxy)isochroman-1-yl)acetate (**3dc**)

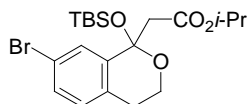

To a solution of 7-bromoisochroman-1-one **2d** (112.6 mg, 0.50 mmol) and carbon acid **1c** (9.9 mg, 10  $\mu$ mol) in  $\text{CH}_2\text{Cl}_2$  (1.0 mL), a solution of *tert*-butyl(1-isopropoxyvinyl)oxydimethylsilane (215 mg, 1.00 mmol) in  $\text{CH}_2\text{Cl}_2$  (0.5 mL) was slowly added at  $-10^\circ\text{C}$  over 1 h using a syringe pump. After being stirred at the same temperature for 1 h, the reaction mixture was quenched with saturated  $\text{NaHCO}_3$  aqueous solution (20 mL) and extracted with  $\text{Et}_2\text{O}$  (20 mL x 3). The combined organic layer was dried over anhydrous  $\text{MgSO}_4$  and concentrated under reduced pressure. Chromatographic purification of the resulting residue using silica gel (hexane/ $\text{EtOAc}$  = 30 : 1) gave the Mukaiyama aldol adduct **3dc** in 86% yield (189.6 mg, 0.43 mmol). Colorless oil; IR (ATR)  $\nu$  2956, 1732, 1104, 1082, 1048, 835, 777  $\text{cm}^{-1}$ ;  $^1\text{H}$  NMR (400 MHz,  $\text{CDCl}_3$ )  $\delta$  0.03 (3H, s), 0.16 (3H, s), 0.87 (9H, s), 0.93 (3H, d,  $J$  = 6.3 Hz), 1.05 (3H, d,  $J$  = 6.3 Hz), 2.56 (1H, dt,  $J$  = 16.1, 3.3 Hz), 2.86 (1H, ddd,  $J$  = 16.1, 11.2, 5.1 Hz), 2.95 (2H, s), 3.86 (1H, td,  $J$  = 11.2, 3.3 Hz), 4.00 (1H, ddd,  $J$  = 11.2, 5.1, 3.3 Hz), 4.76 (1H, sept,  $J$  = 6.3 Hz), 6.93 (1H, d,  $J$  = 8.1 Hz), 7.29 (1H, dd,  $J$  = 8.1, 2.0 Hz), 7.46 (1H, d,  $J$  = 2.0 Hz);  $^{13}\text{C}$  NMR (100 MHz,  $\text{CDCl}_3$ )  $\delta$   $-3.3$  and  $-2.8$ , 17.9, 21.3 and 21.5, 25.7 (3C), 28.2, 49.0, 60.3, 67.4, 96.9, 119.6, 129.4, 130.0, 130.4, 133.0, 140.5, 168.0; MS (ESI-TOF)  $m/z$  465  $[\text{M}+\text{Na}]^+$ , 467  $[\text{M}+2+\text{H}]^+$ ; HRMS calcd for  $\text{C}_{20}\text{H}_{31}\text{BrNaO}_4\text{Si}$   $[\text{M}+\text{Na}]^+$ , 465.1073; found, 465.1077.

A solution of Mukaiyama aldol adduct **3dc** (38.5 mg, 87  $\mu$ mol) in  $\text{CH}_2\text{Cl}_2$  (1.0 mL) was treated with carbon

acid **1c** (2.0 mg, 2  $\mu$ mol) at room temperature for 5 min. The reaction mixture was quenched with saturated NaHCO<sub>3</sub> aqueous solution (15 mL), extracted with Et<sub>2</sub>O (20 mL x 3), and concentrated under reduced pressure. The resulting residue was purified by column chromatography on basic alumina (hexane/EtOAc = 5 : 1) to give the vinyl ether **4dc** in 98% yield (26.5 mg, 0.85 mmol). The structure of the product was confirmed by comparison of <sup>1</sup>H and <sup>13</sup>C NMR spectra with those of the authentic sample.

## 5. X-ray crystallographic data

X-ray crystallographic data of **4ha** and **4ia** have been deposited with Cambridge Crystallographic Data Center (CCDC) as supplementary publication Nos. CCDC 881214 (**4ha**) and 881215 (**4ia**). These data can be obtained free of charge from the CCDC *via* [www.ccdc.cam.ac.uk/data\\_request/cif](http://www.ccdc.cam.ac.uk/data_request/cif).

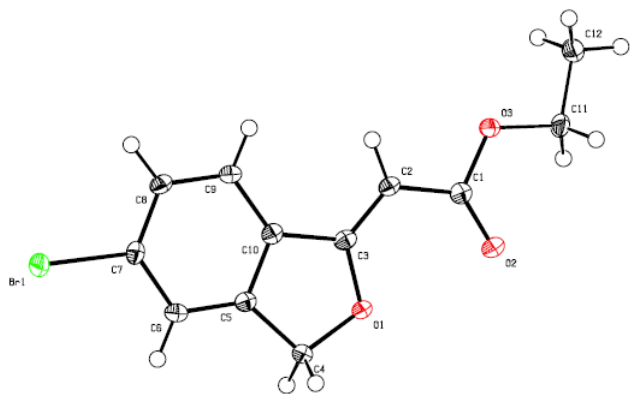

X-ray structure of **4ha**

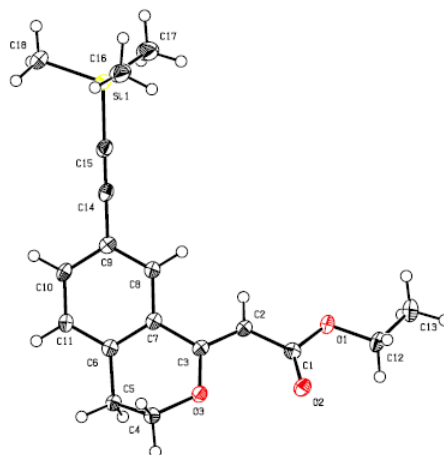

X-ray structure of **4ia**

**Table S1.** Crystal data and structure refinement for **4ha**.

|                                 |                                                                 |                               |
|---------------------------------|-----------------------------------------------------------------|-------------------------------|
| Empirical formula               | $C_{12}H_{11}BrO_3$                                             |                               |
| Formula weight                  | 283.12                                                          |                               |
| Temperature                     | 90 K                                                            |                               |
| Wavelength                      | 0.71073 Å                                                       |                               |
| Crystal system                  | Monoclinic                                                      |                               |
| Space group                     | P 21/c                                                          |                               |
| Unit cell dimensions            | $a = 13.2003(10)$ Å                                             | $\alpha = 90^\circ$ .         |
|                                 | $b = 11.6716(9)$ Å                                              | $\beta = 91.8430(10)^\circ$ . |
|                                 | $c = 7.2810(6)$ Å                                               | $\gamma = 90^\circ$ .         |
| Volume                          | $1121.19(15)$ Å <sup>3</sup>                                    |                               |
| Z                               | 4                                                               |                               |
| Density (calculated)            | 1.677 Mg/m <sup>3</sup>                                         |                               |
| Absorption coefficient          | 3.654 mm <sup>-1</sup>                                          |                               |
| F(000)                          | 568                                                             |                               |
| Crystal size                    | 0.21 x 0.14 x 0.06 mm <sup>3</sup>                              |                               |
| Theta range for data collection | 2.33 to 25.03°.                                                 |                               |
| Index ranges                    | $-15 \leq h \leq 9$ , $-13 \leq k \leq 13$ , $-8 \leq l \leq 8$ |                               |
| Reflections collected           | 5250                                                            |                               |
| Independent reflections         | 1974 [R(int) = 0.0210]                                          |                               |
| Completeness to theta = 25.03°  | 99.6 %                                                          |                               |
| Absorption correction           | Analytical                                                      |                               |
| Max. and min. transmission      | 0.8106 and 0.5141                                               |                               |

|                                      |                                      |
|--------------------------------------|--------------------------------------|
| Refinement method                    | Full-matrix least-squares on $F^2$   |
| Data / restraints / parameters       | 1974 / 0 / 147                       |
| Goodness-of-fit on $F^2$             | 1.042                                |
| Final R indices [ $I > 2\sigma(I)$ ] | $R1 = 0.0217$ , $wR2 = 0.0507$       |
| R indices (all data)                 | $R1 = 0.0258$ , $wR2 = 0.0520$       |
| Largest diff. peak and hole          | 0.368 and -0.299 $e.\text{\AA}^{-3}$ |

**Table S2.** Crystal data and structure refinement for **4ia**.

|                                        |                                                                                                                                                                  |
|----------------------------------------|------------------------------------------------------------------------------------------------------------------------------------------------------------------|
| Empirical formula                      | $C_{18}H_{22}O_3Si$                                                                                                                                              |
| Formula weight                         | 314.45                                                                                                                                                           |
| Temperature                            | 90 K                                                                                                                                                             |
| Wavelength                             | 0.71073 $\text{\AA}$                                                                                                                                             |
| Crystal system                         | Monoclinic                                                                                                                                                       |
| Space group                            | P 21/c                                                                                                                                                           |
| Unit cell dimensions                   | $a = 19.733(5) \text{\AA}$ $\alpha = 90^\circ$ .<br>$b = 12.199(3) \text{\AA}$ $\beta = 100.236(3)^\circ$ .<br>$c = 7.4044(17) \text{\AA}$ $\gamma = 90^\circ$ . |
| Volume                                 | 1754.0(7) $\text{\AA}^3$                                                                                                                                         |
| Z                                      | 4                                                                                                                                                                |
| Density (calculated)                   | 1.191 $\text{Mg/m}^3$                                                                                                                                            |
| Absorption coefficient                 | 0.143 $\text{mm}^{-1}$                                                                                                                                           |
| F(000)                                 | 672                                                                                                                                                              |
| Crystal size                           | 0.27 x 0.27 x 0.08 $\text{mm}^3$                                                                                                                                 |
| Theta range for data collection        | 2.10 to 25.02 $^\circ$ .                                                                                                                                         |
| Index ranges                           | $-23 \leq h \leq 17$ , $-14 \leq k \leq 13$ , $-8 \leq l \leq 8$                                                                                                 |
| Reflections collected                  | 7915                                                                                                                                                             |
| Independent reflections                | 3091 [ $R(\text{int}) = 0.0248$ ]                                                                                                                                |
| Completeness to $\theta = 25.02^\circ$ | 99.6 %                                                                                                                                                           |
| Absorption correction                  | Analytical                                                                                                                                                       |
| Max. and min. transmission             | 0.9886 and 0.9623                                                                                                                                                |
| Refinement method                      | Full-matrix least-squares on $F^2$                                                                                                                               |
| Data / restraints / parameters         | 3091 / 0 / 203                                                                                                                                                   |
| Goodness-of-fit on $F^2$               | 1.025                                                                                                                                                            |
| Final R indices [ $I > 2\sigma(I)$ ]   | $R1 = 0.0375$ , $wR2 = 0.0921$                                                                                                                                   |
| R indices (all data)                   | $R1 = 0.0432$ , $wR2 = 0.0959$                                                                                                                                   |
| Largest diff. peak and hole            | 0.419 and -0.322 $e.\text{\AA}^{-3}$                                                                                                                             |



## 6. <sup>1</sup>H and <sup>13</sup>C NMR spectra of all compounds

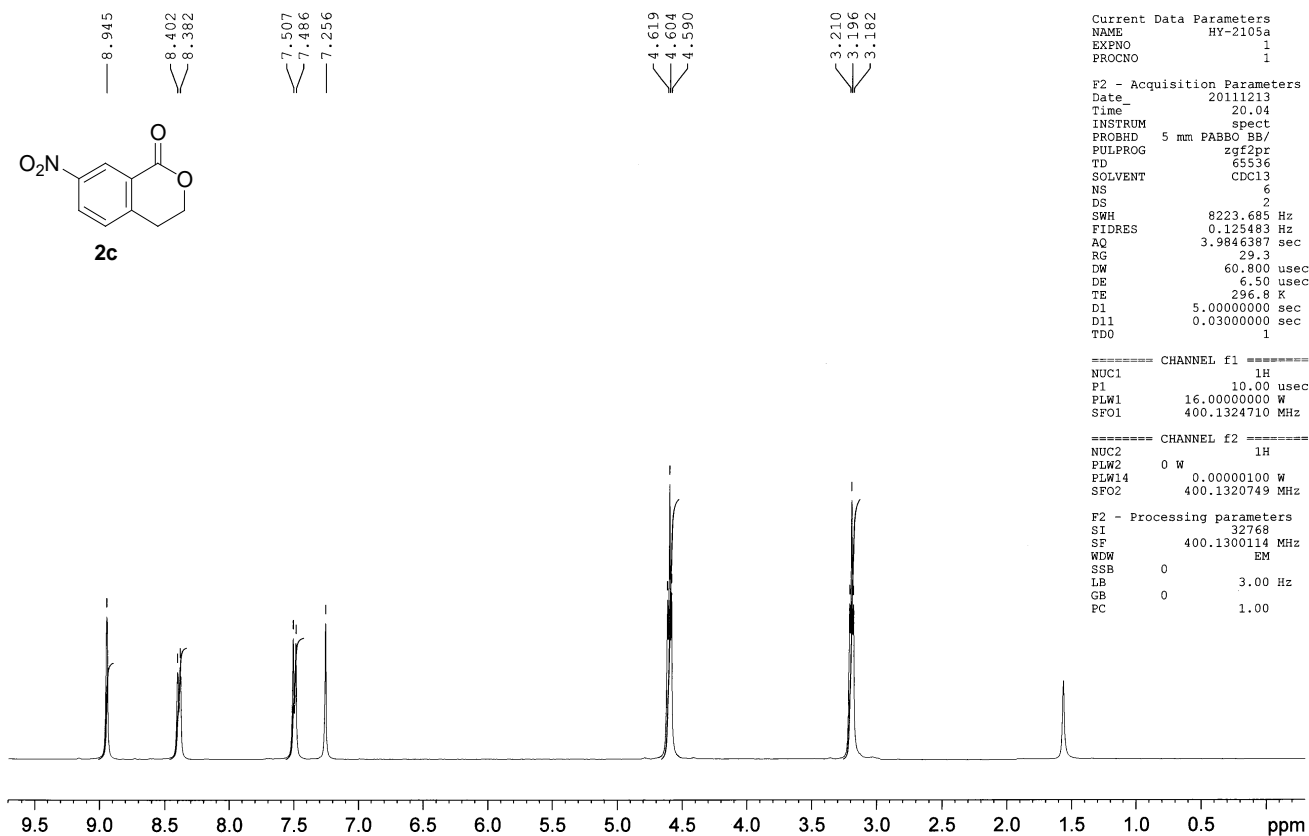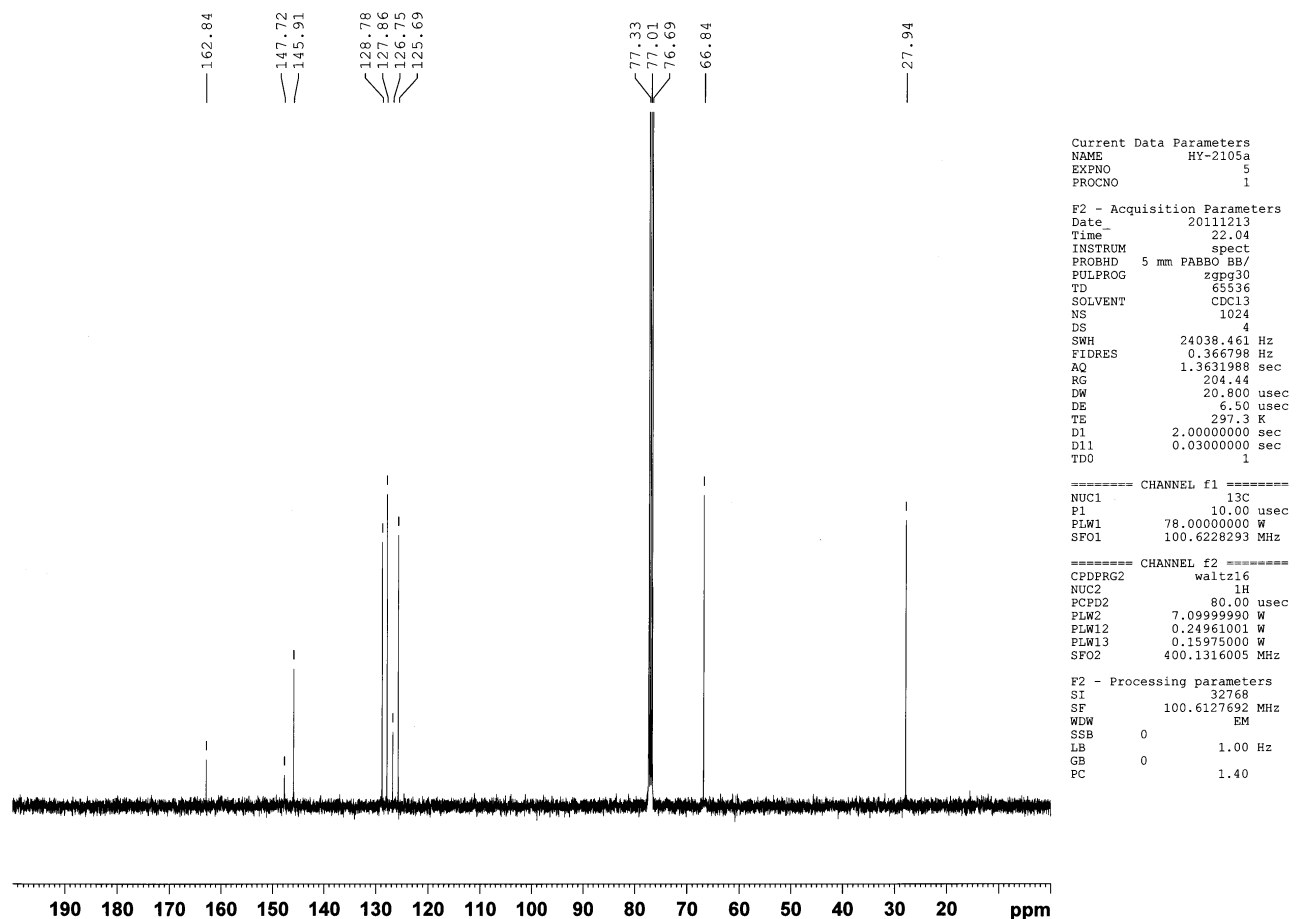

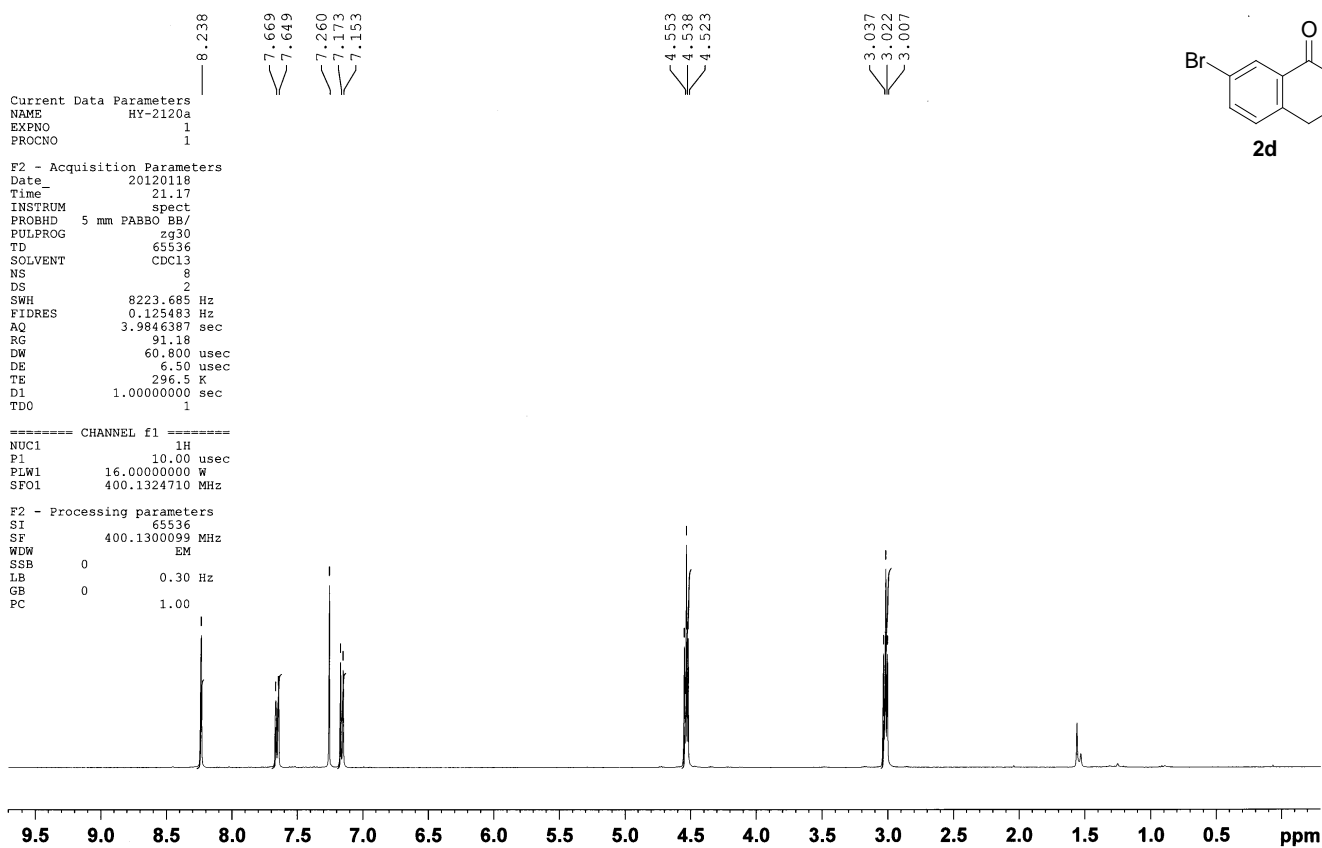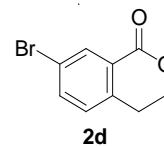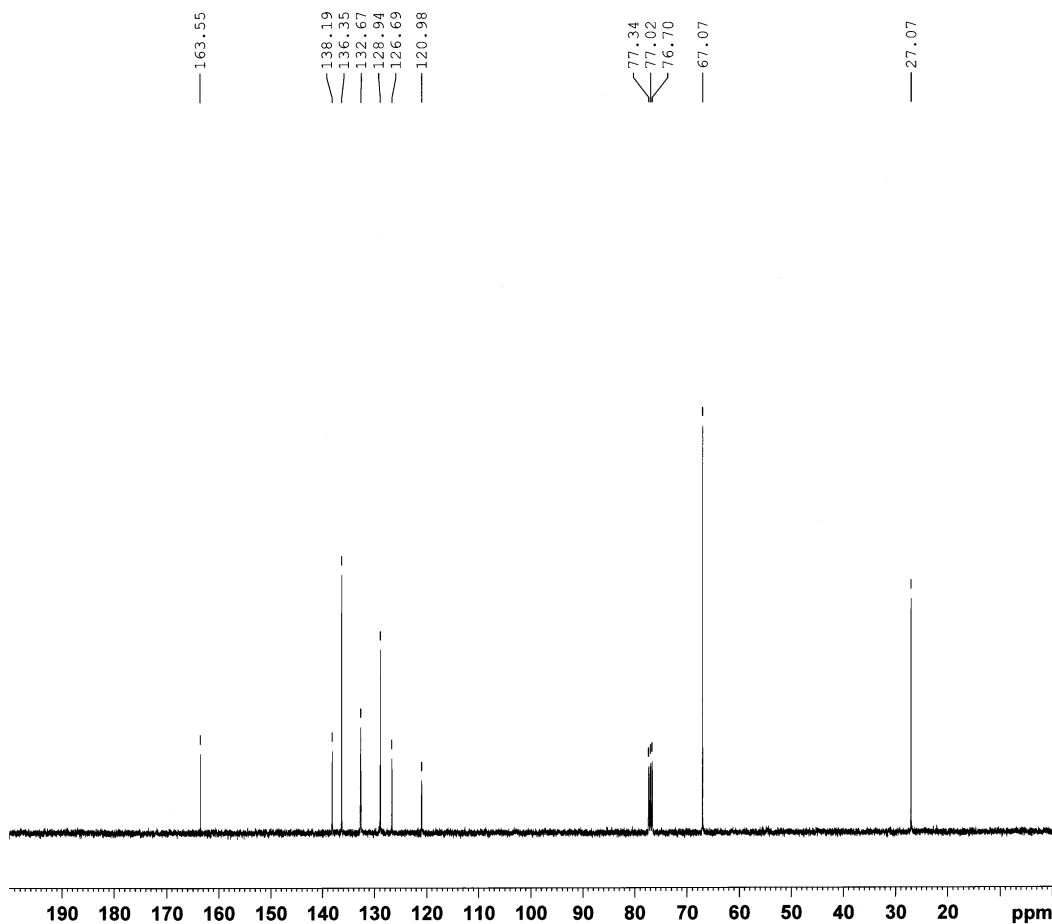

Current Data Parameters  
 NAME HY-2120a  
 EXPNO 4  
 PROCNO 1

F2 - Acquisition Parameters  
 Date\_ 20120229  
 Time\_ 11.01  
 INSTRUM spect  
 PROBHD 5 mm PABBO BB/  
 PULPROG zgpg30  
 TD 65536  
 SOLVENT CDCl3  
 NS 44  
 DS 4  
 SWH 24038.461 Hz  
 FIDRES 0.366798 Hz  
 AQ 1.3631988 sec  
 RG 204.44  
 DW 20.800 usec  
 DE 6.50 usec  
 TE 296.5 K  
 D1 2.00000000 sec  
 D11 0.03000000 sec  
 TDO 1

===== CHANNEL f1 =====  
 NUC1 13C  
 P1 10.00 usec  
 PLW1 78.00000000 W  
 SFO1 100.6228293 MHz

===== CHANNEL f2 =====  
 CPDPRG2 waltz16  
 NUC2 1H  
 PCPD2 80.00 usec  
 PLW2 7.09999990 W  
 PLW12 0.24961001 W  
 PLW13 0.15975000 W  
 SFO2 400.1316005 MHz

F2 - Processing parameters  
 SI 32768  
 SF 100.6127900 MHz  
 WDW EM  
 SSB 0  
 LB 1.00 Hz  
 GB 0  
 PC 1.40

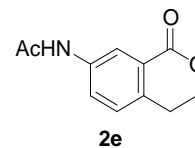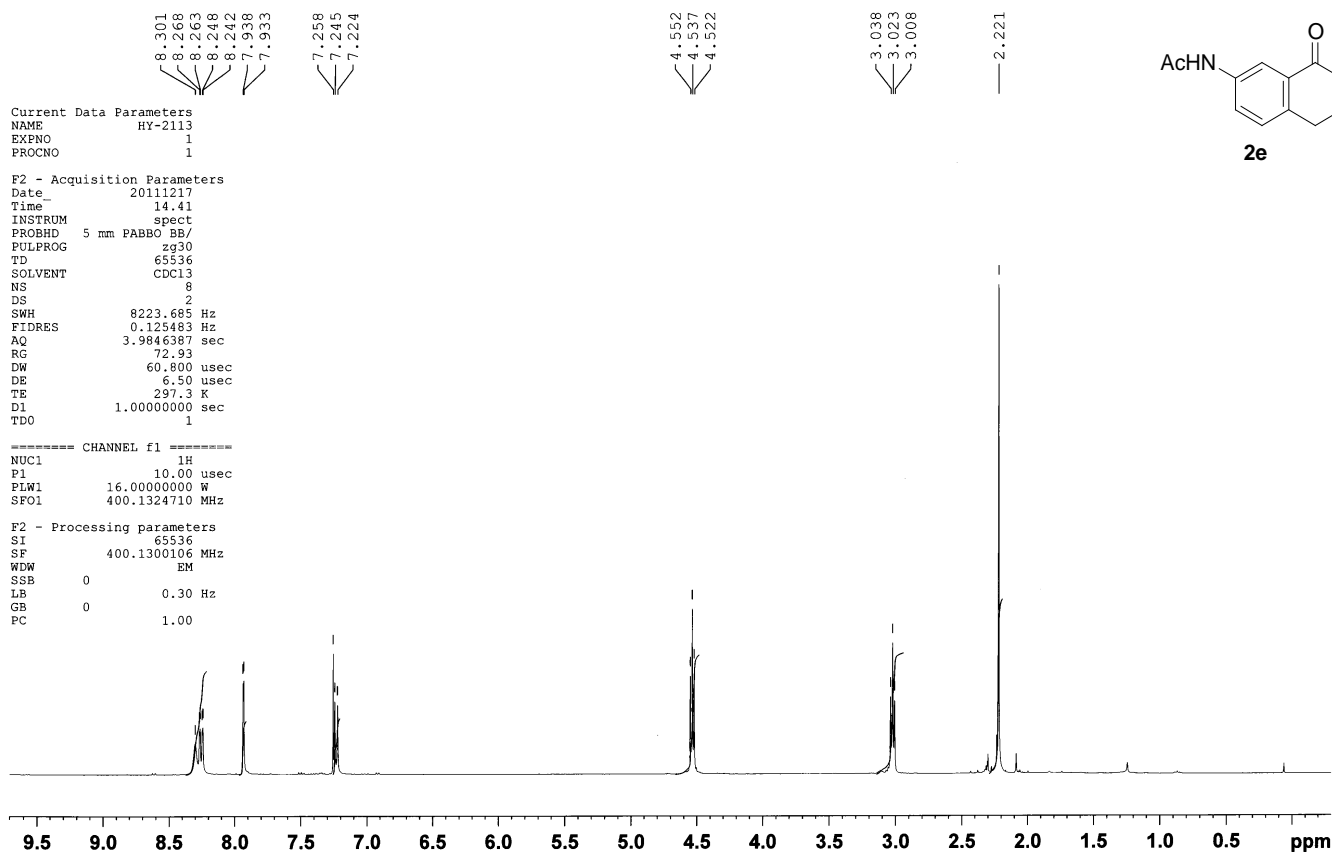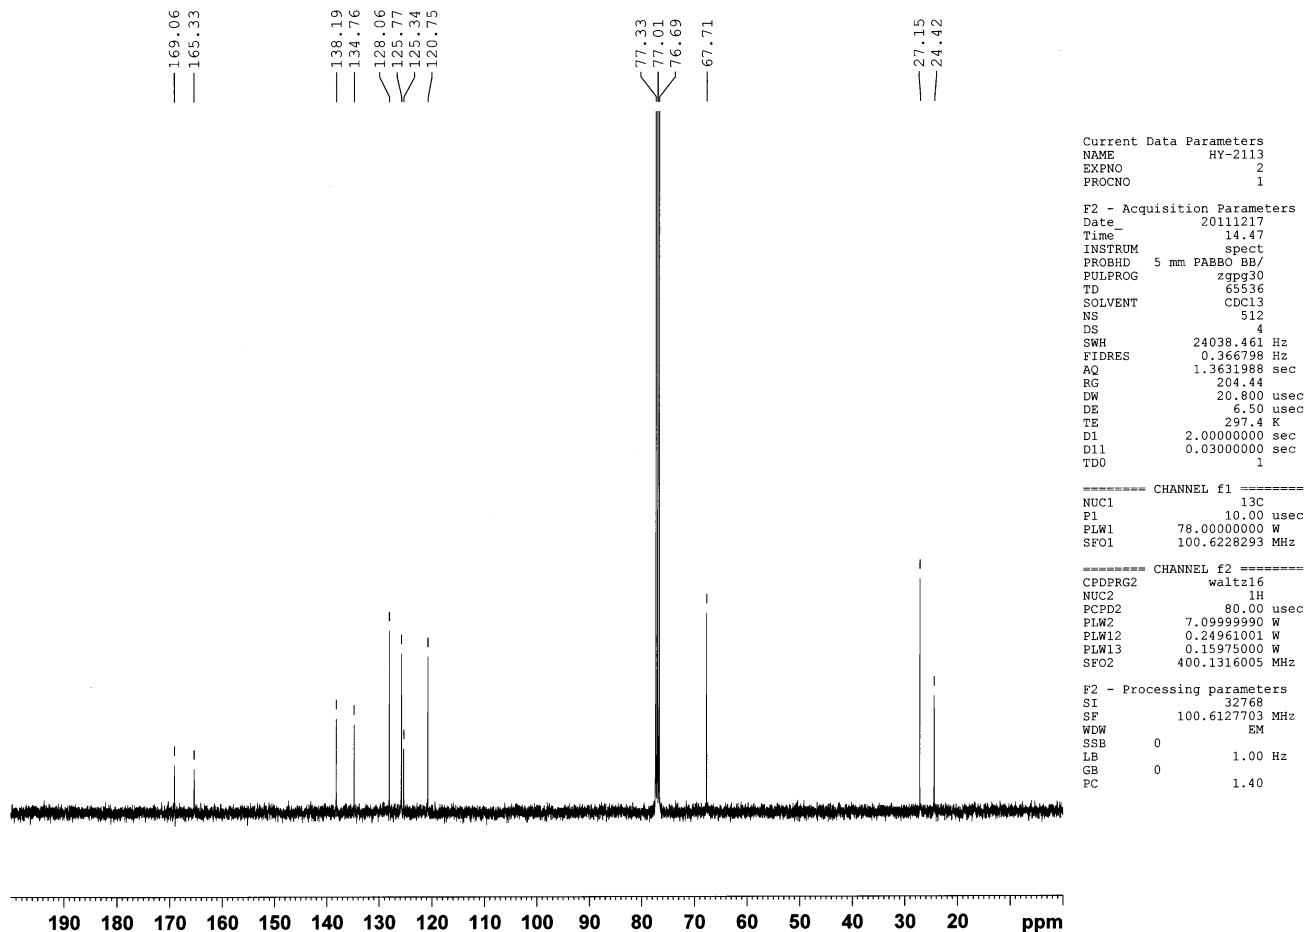

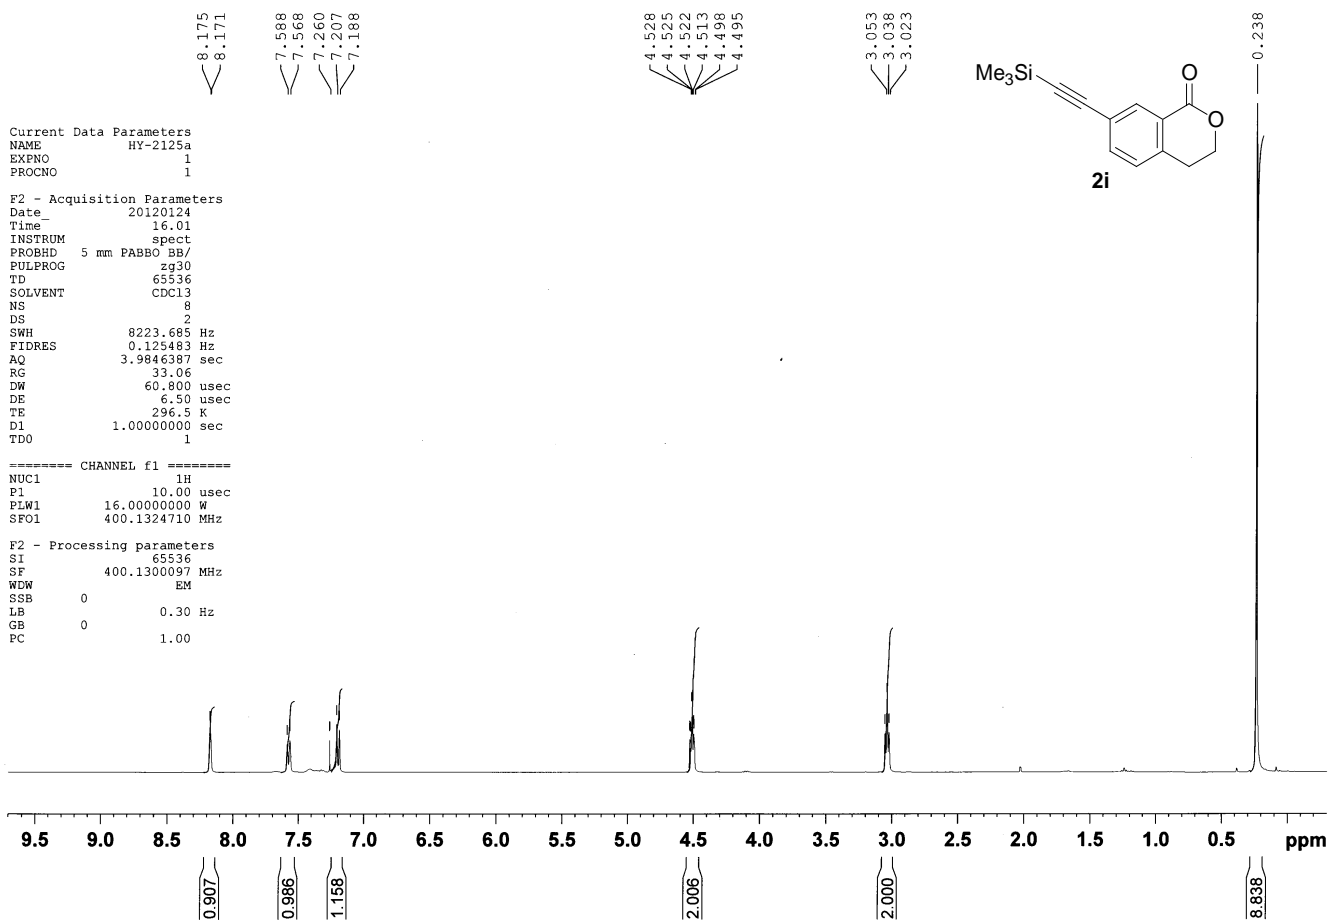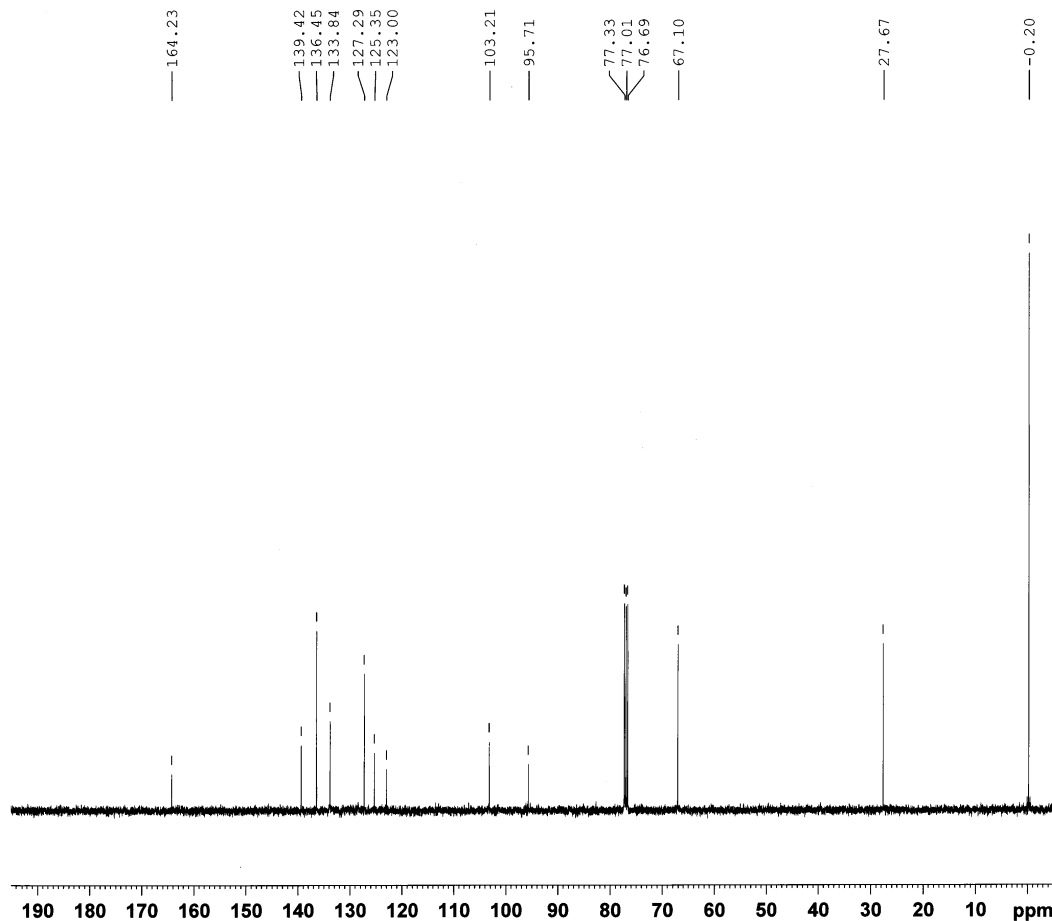

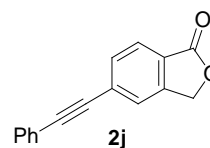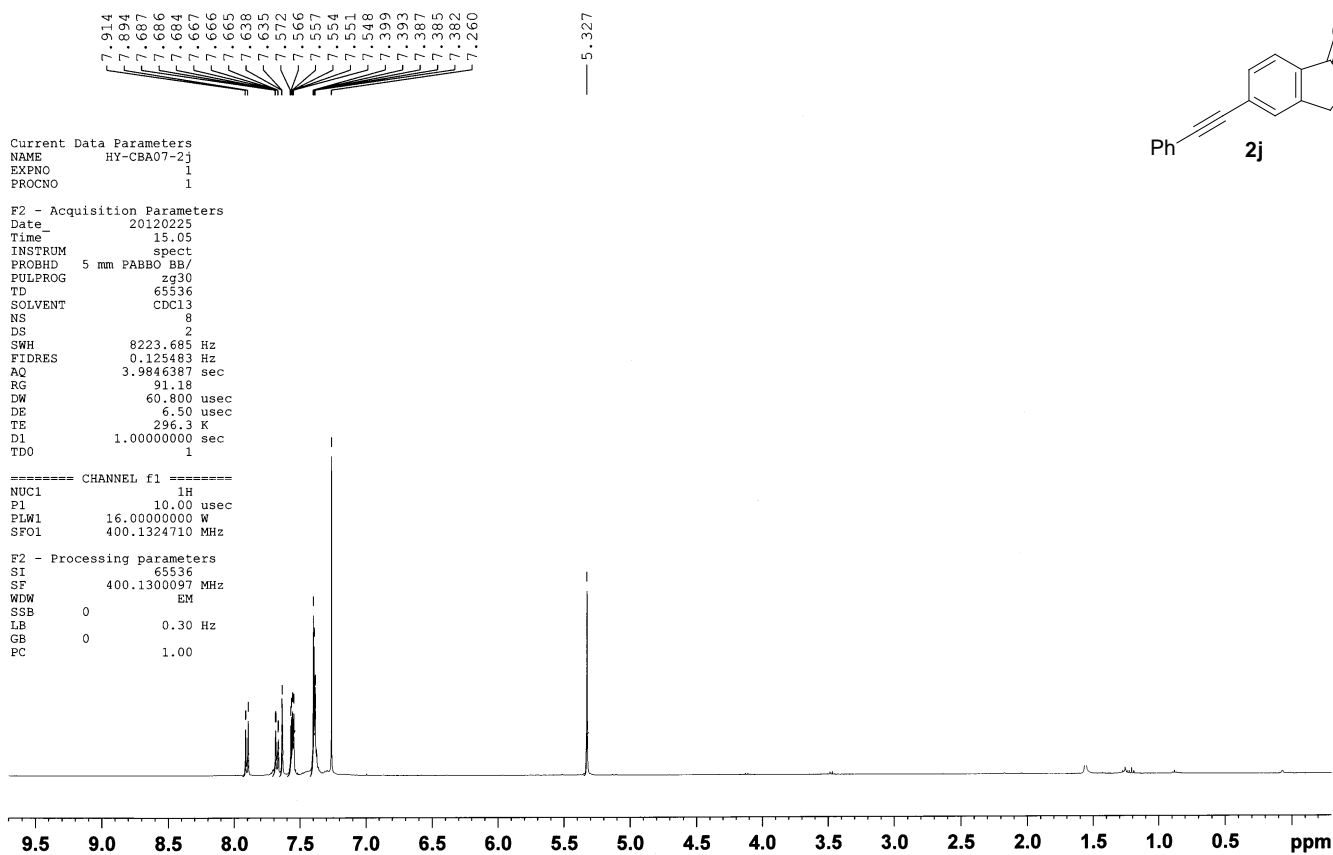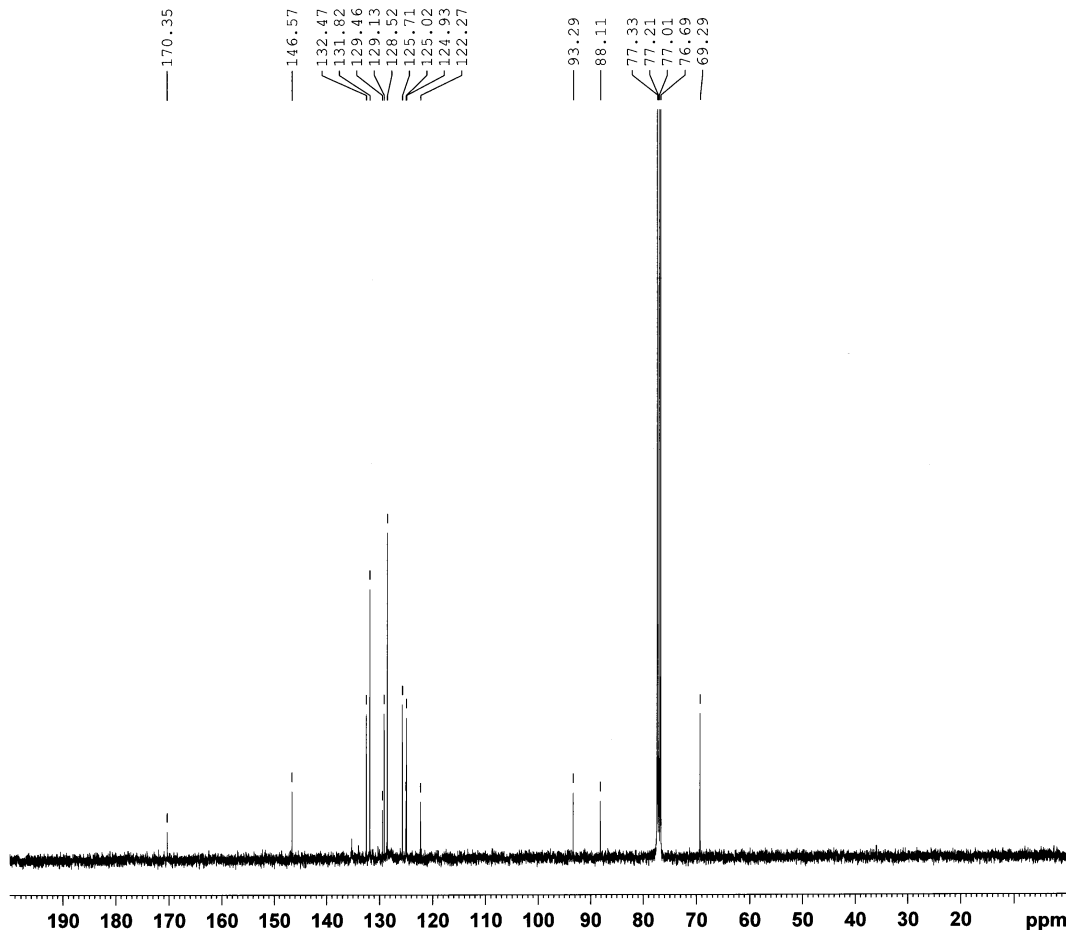

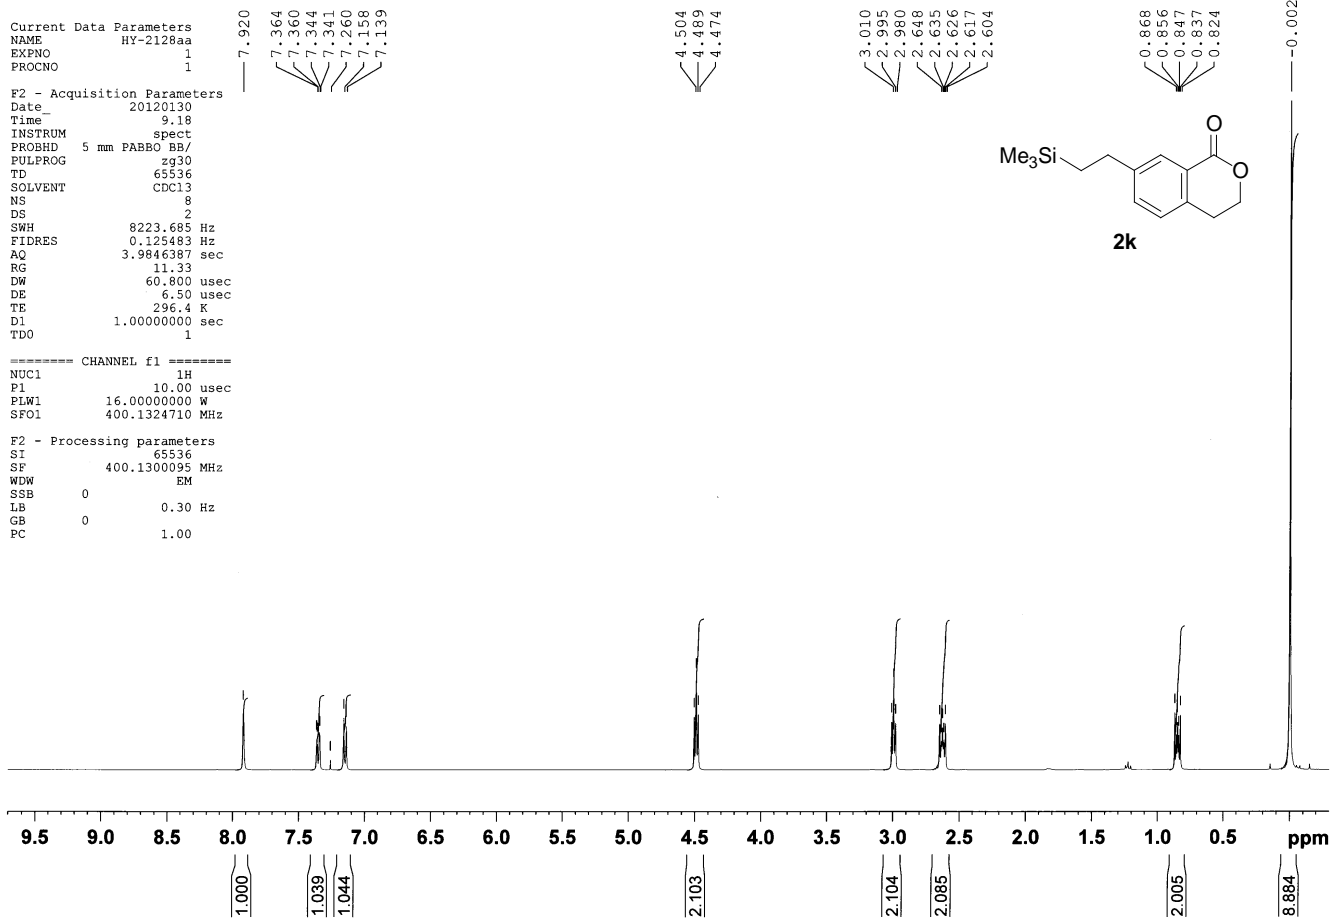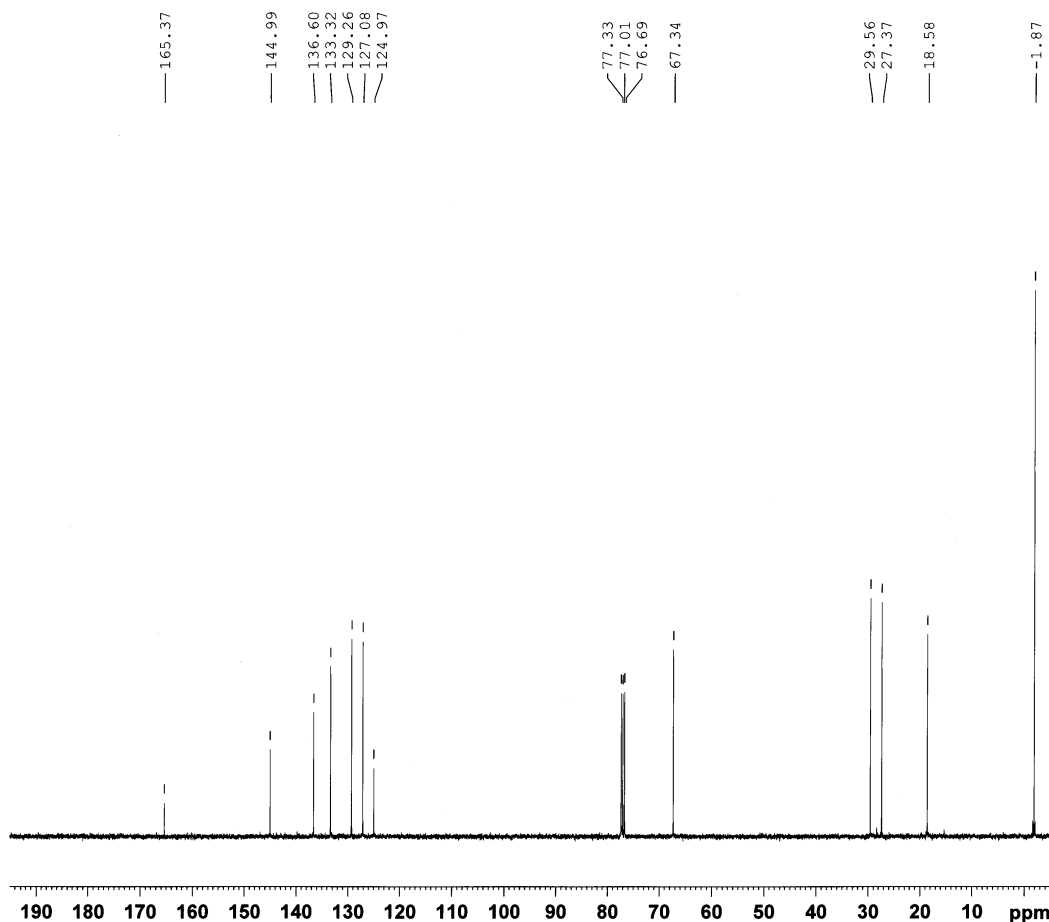

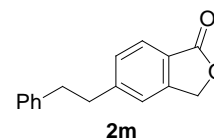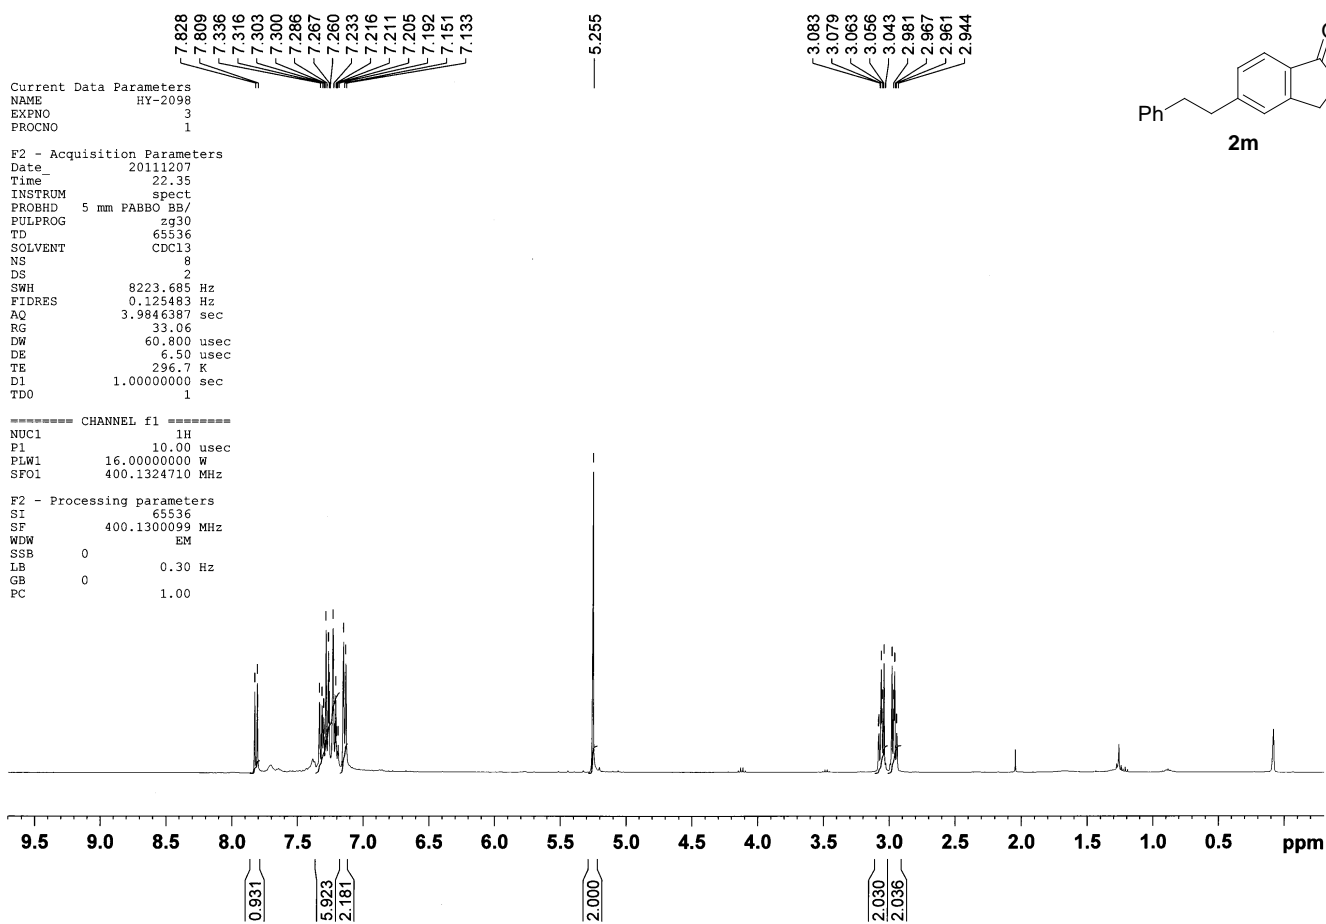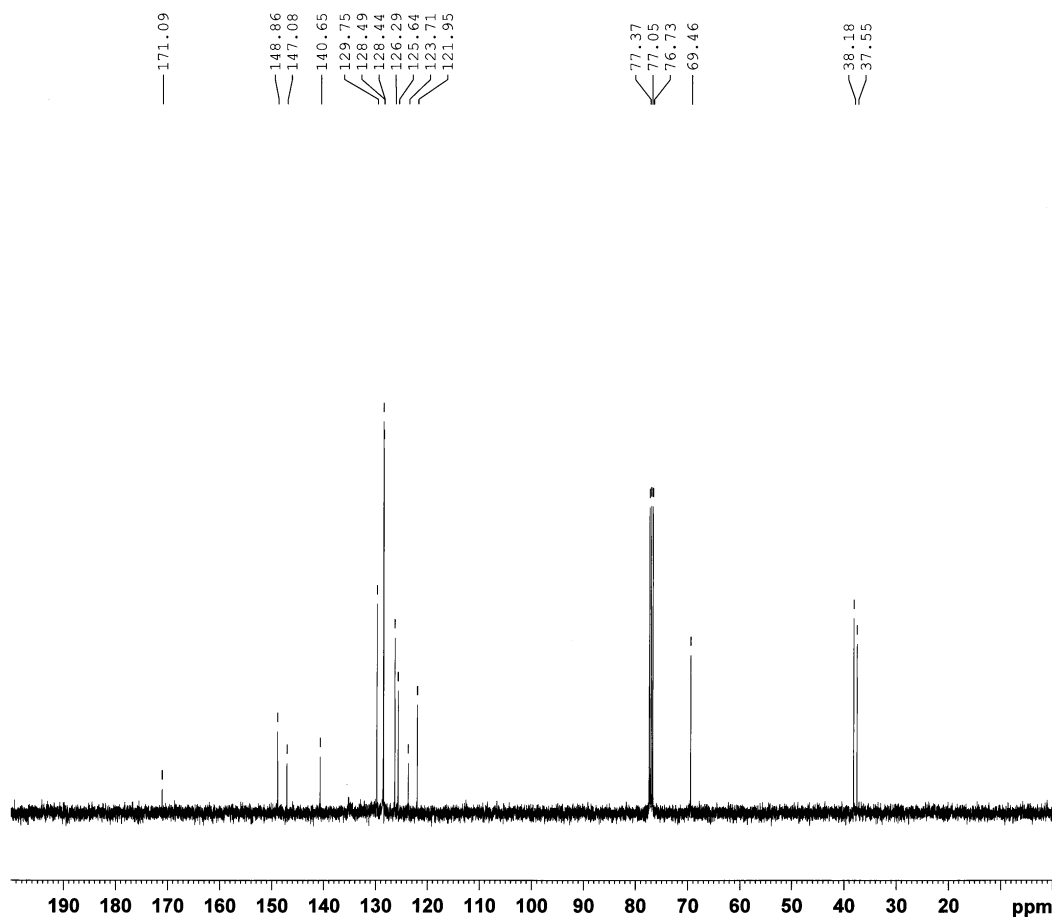

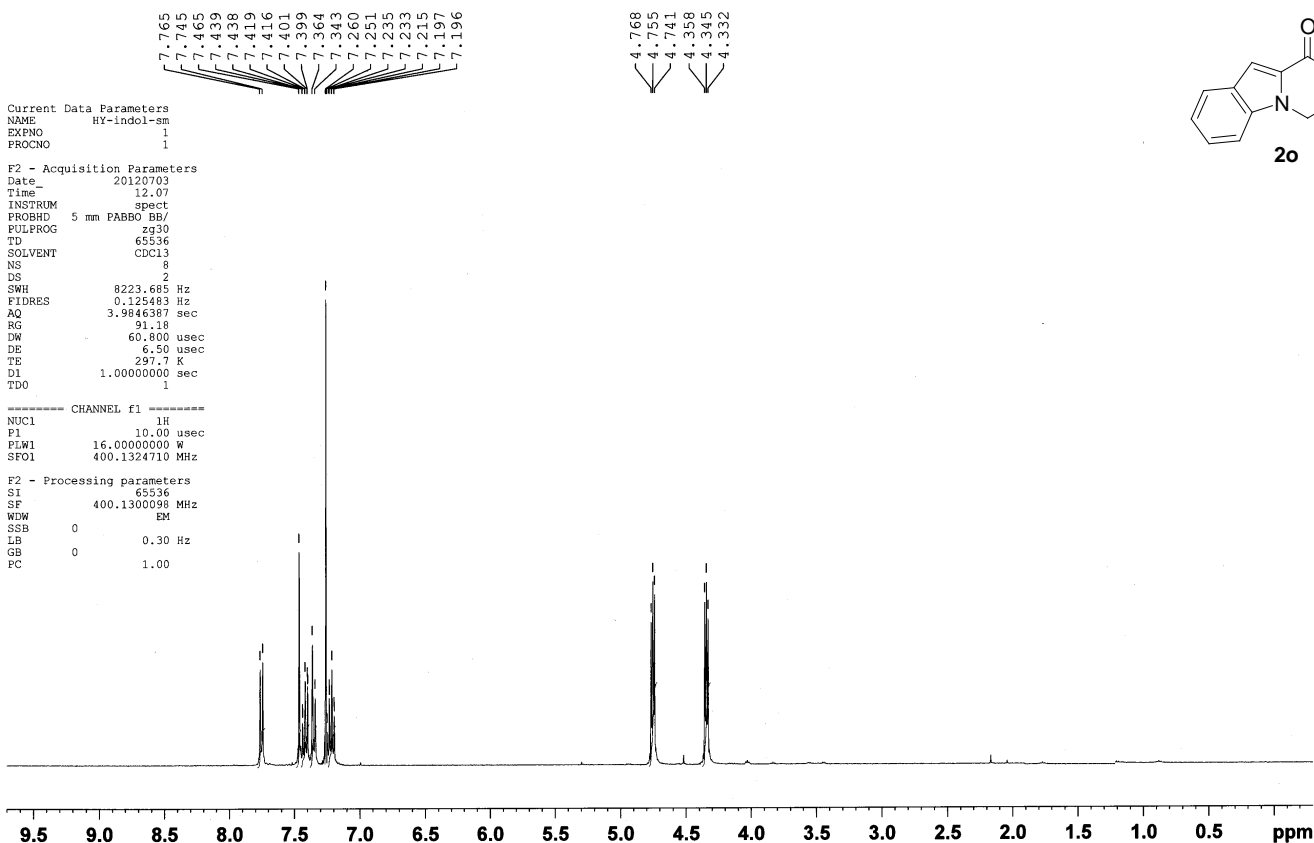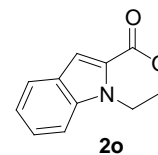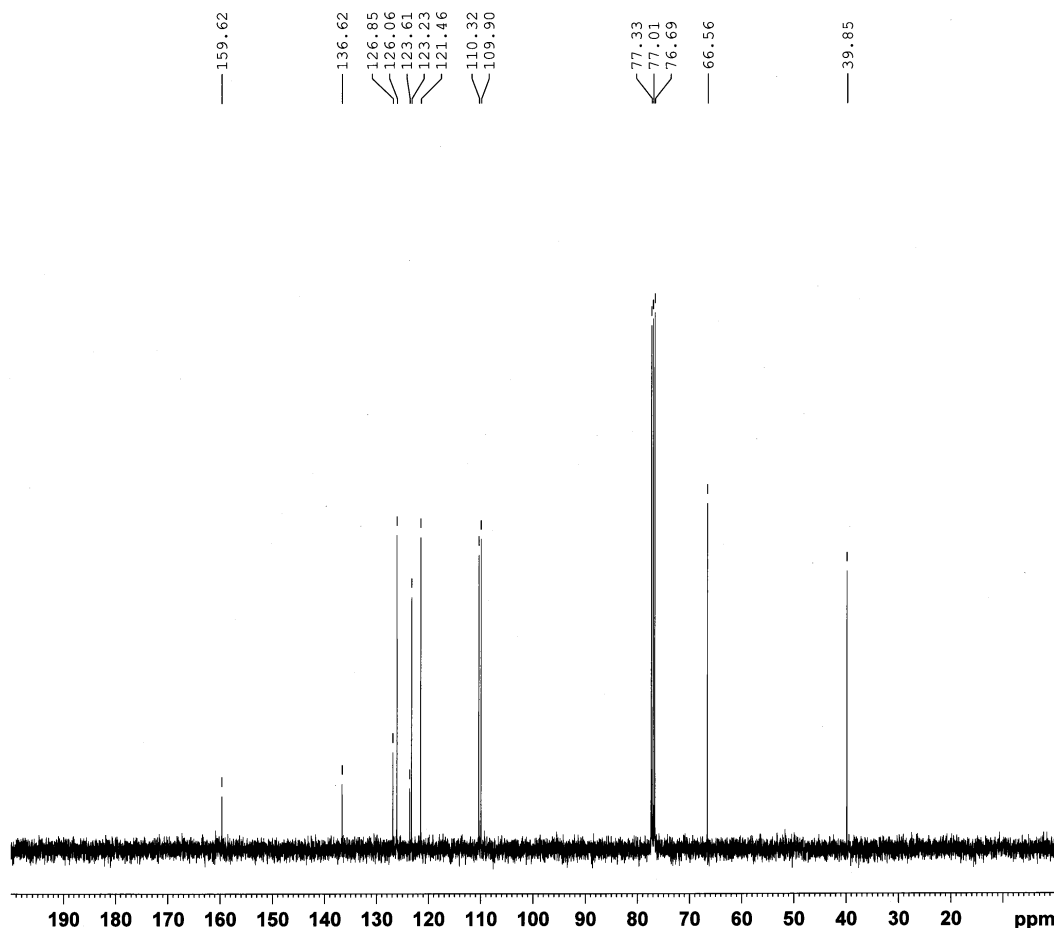



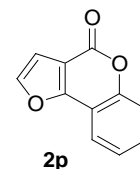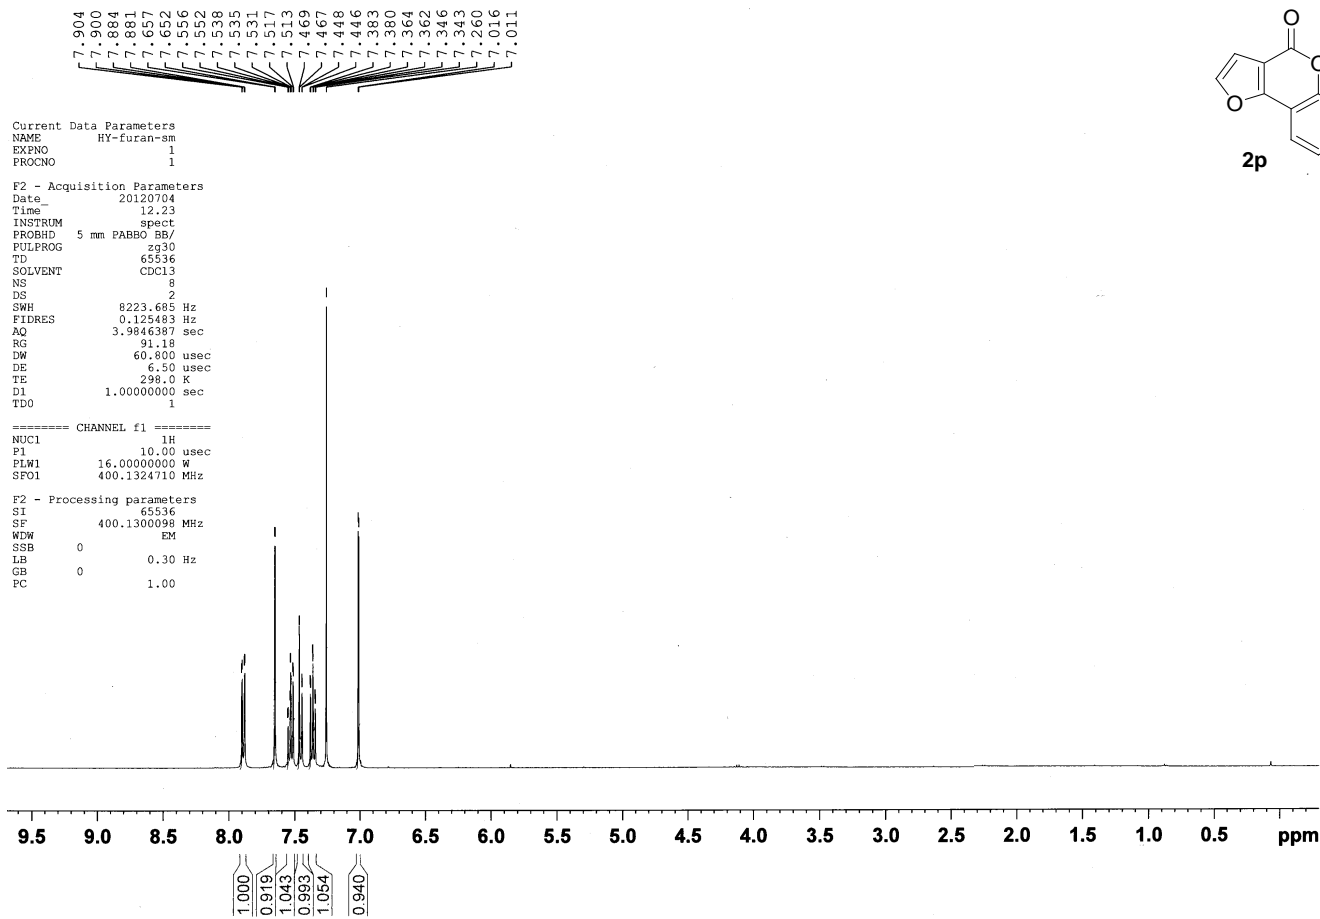

Current Data Parameters  
NAME HY-furan-sm  
EXPNO 2  
PROCNO 1

F2 - Acquisition Parameters  
Date\_ 20120704  
Time 12.42  
INSTRUM spect  
PROBHD 5 mm PABBO BB/  
PULPROG zgpg30  
TD 65536  
SOLVENT CDCl3  
NS 160  
DS 4  
SWH 24038.461 Hz  
FIDRES 0.366798 Hz  
AQ 1.3631988 sec  
RG 204.44  
DW 20.800 usec  
DE 6.50 usec  
TE 298.6 K  
D1 2.00000000 sec  
D11 0.03000000 sec  
TD0 1

===== CHANNEL f1 =====  
NUC1 13C  
P1 10.00 usec  
PLW1 78.00000000 W  
SFO1 100.6228293 MHz

===== CHANNEL f2 =====  
CPDPRG2 waltz16  
NUC2 1H  
PCPD2 80.00 usec  
PLW2 7.09999990 W  
PLW12 0.24961001 W  
PLW13 0.15975000 W  
SFO2 400.1316005 MHz

F2 - Processing parameters  
SI 32768  
SF 100.6127729 MHz  
WDW EM  
SSB 0  
LB 1.00 Hz  
GB 0  
PC 1.40

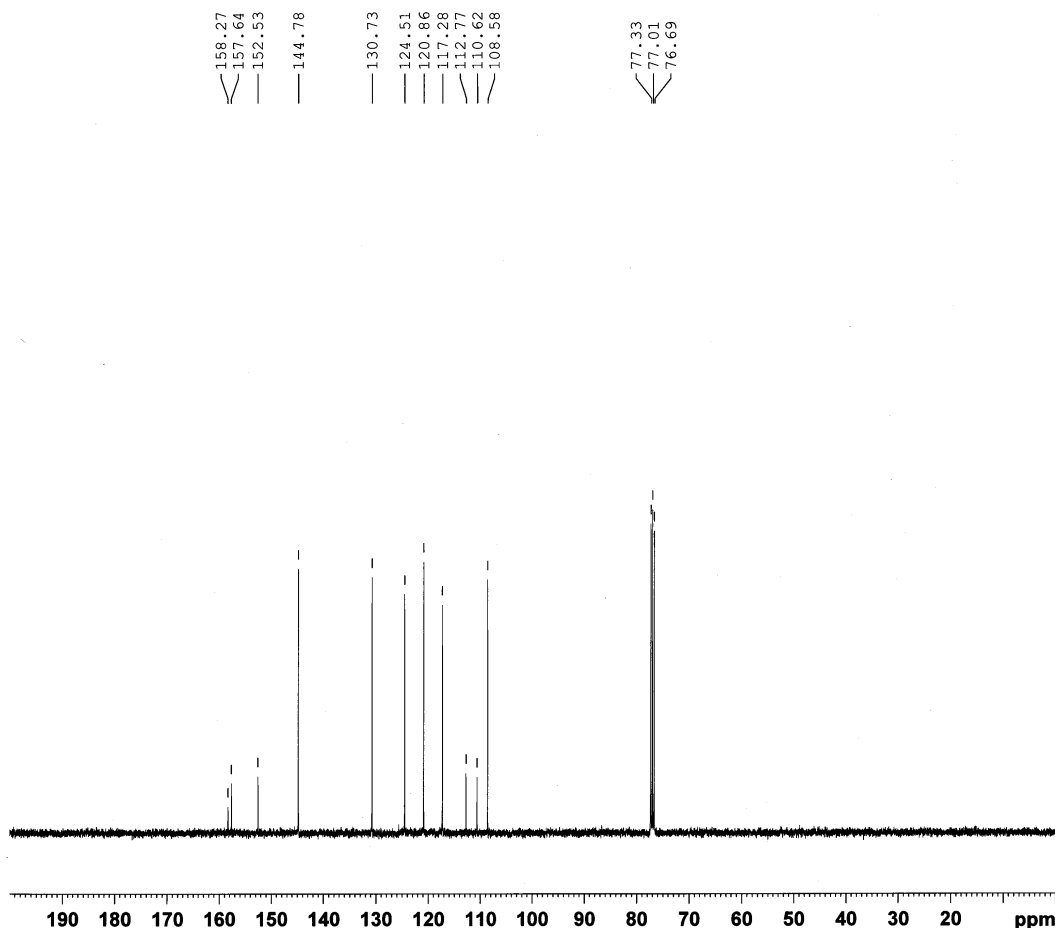

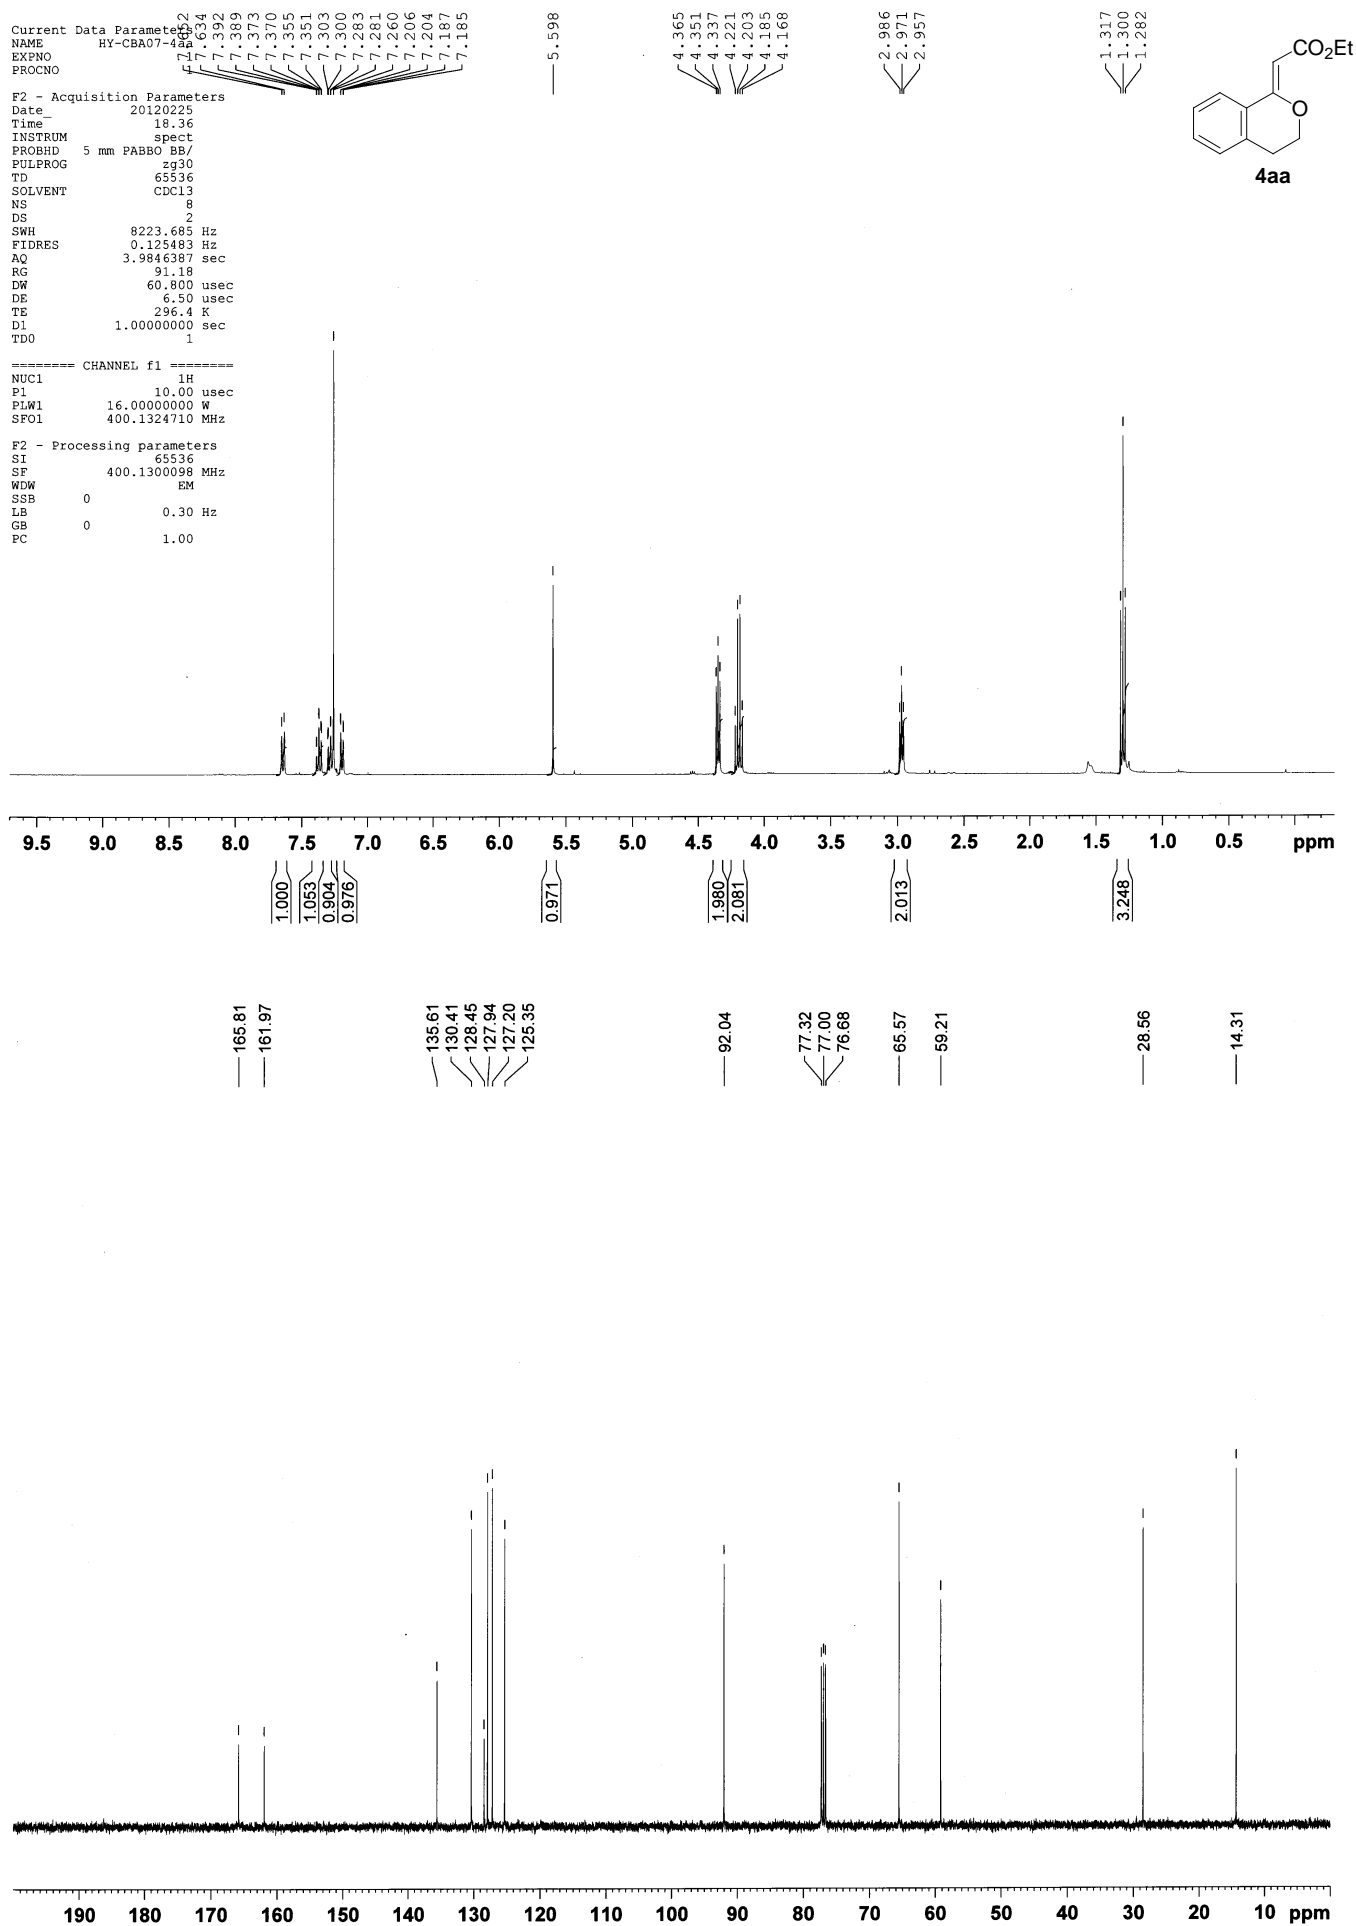

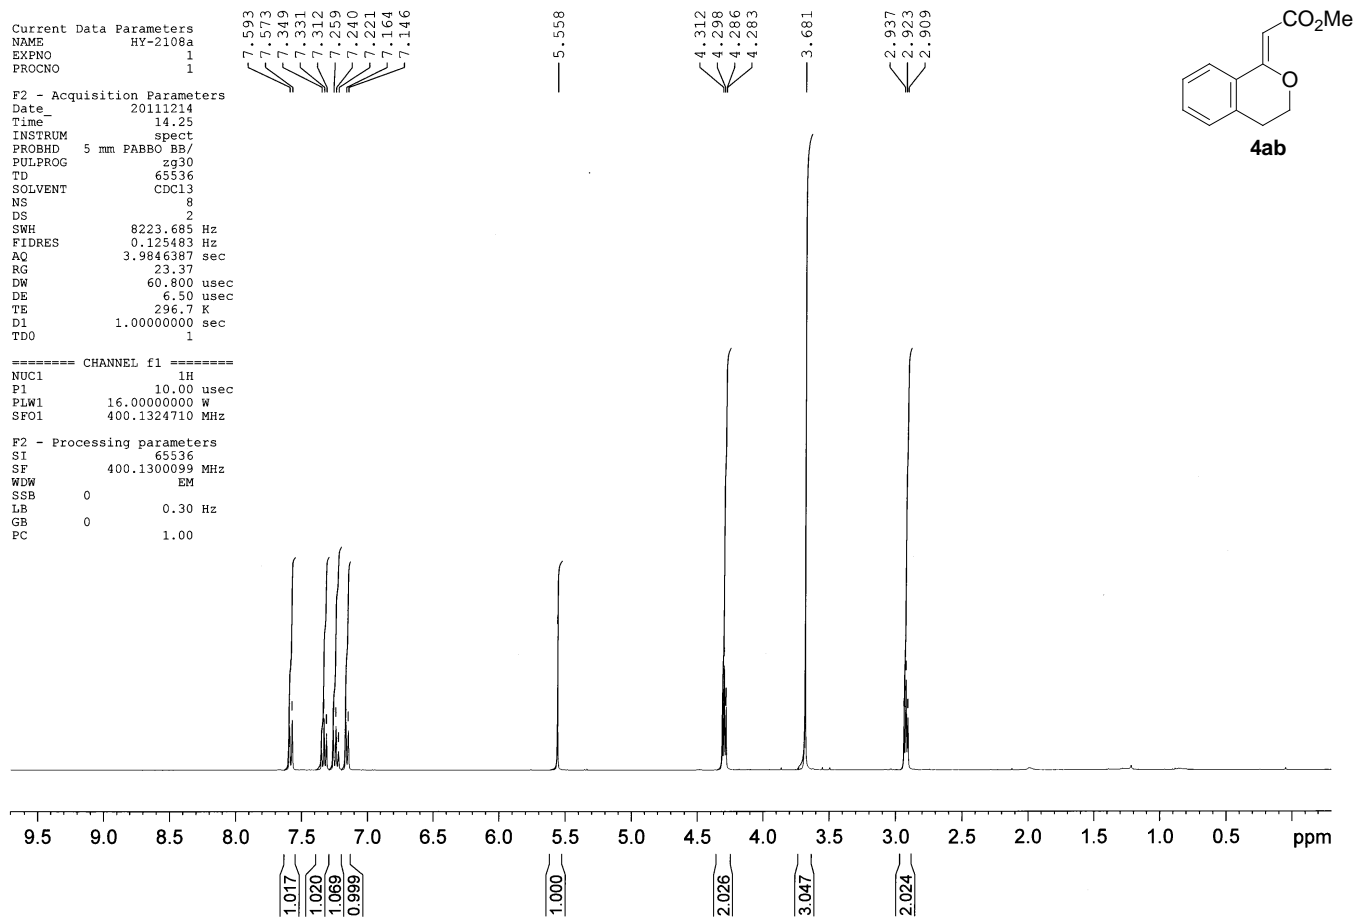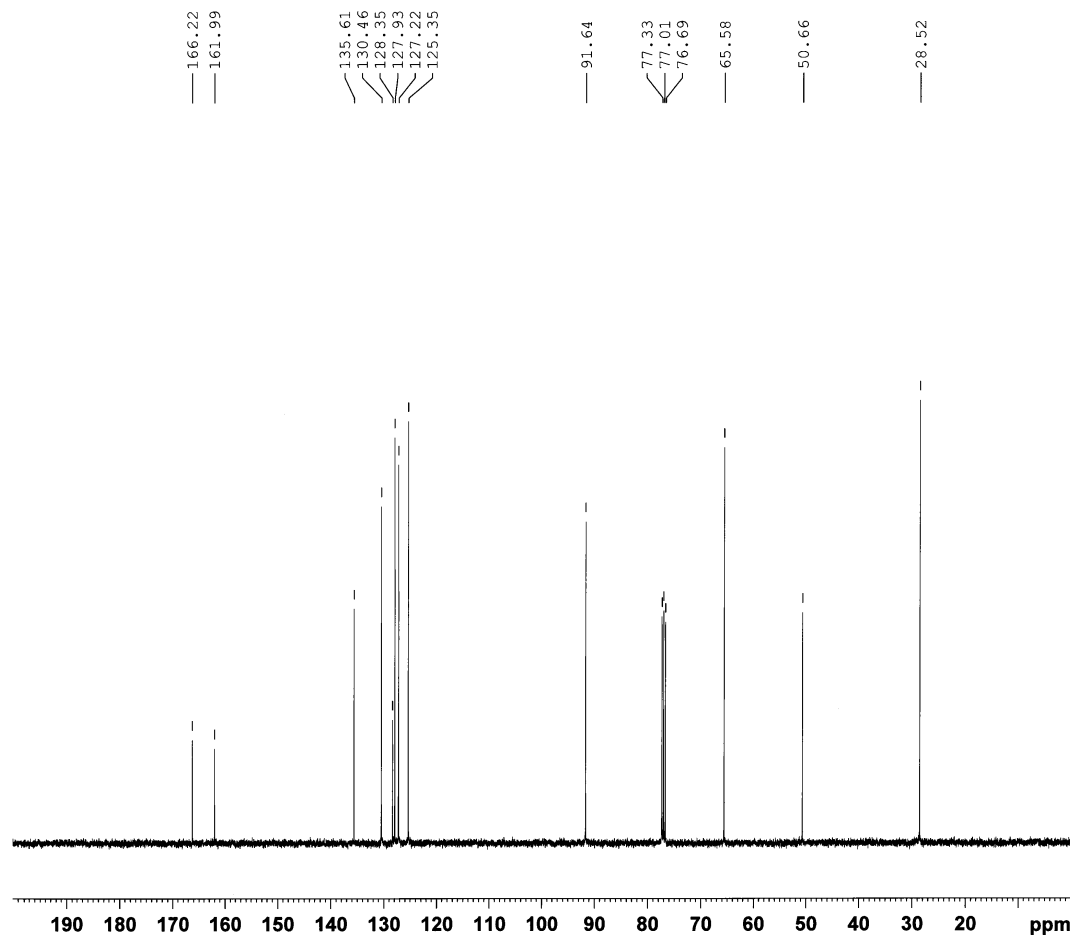

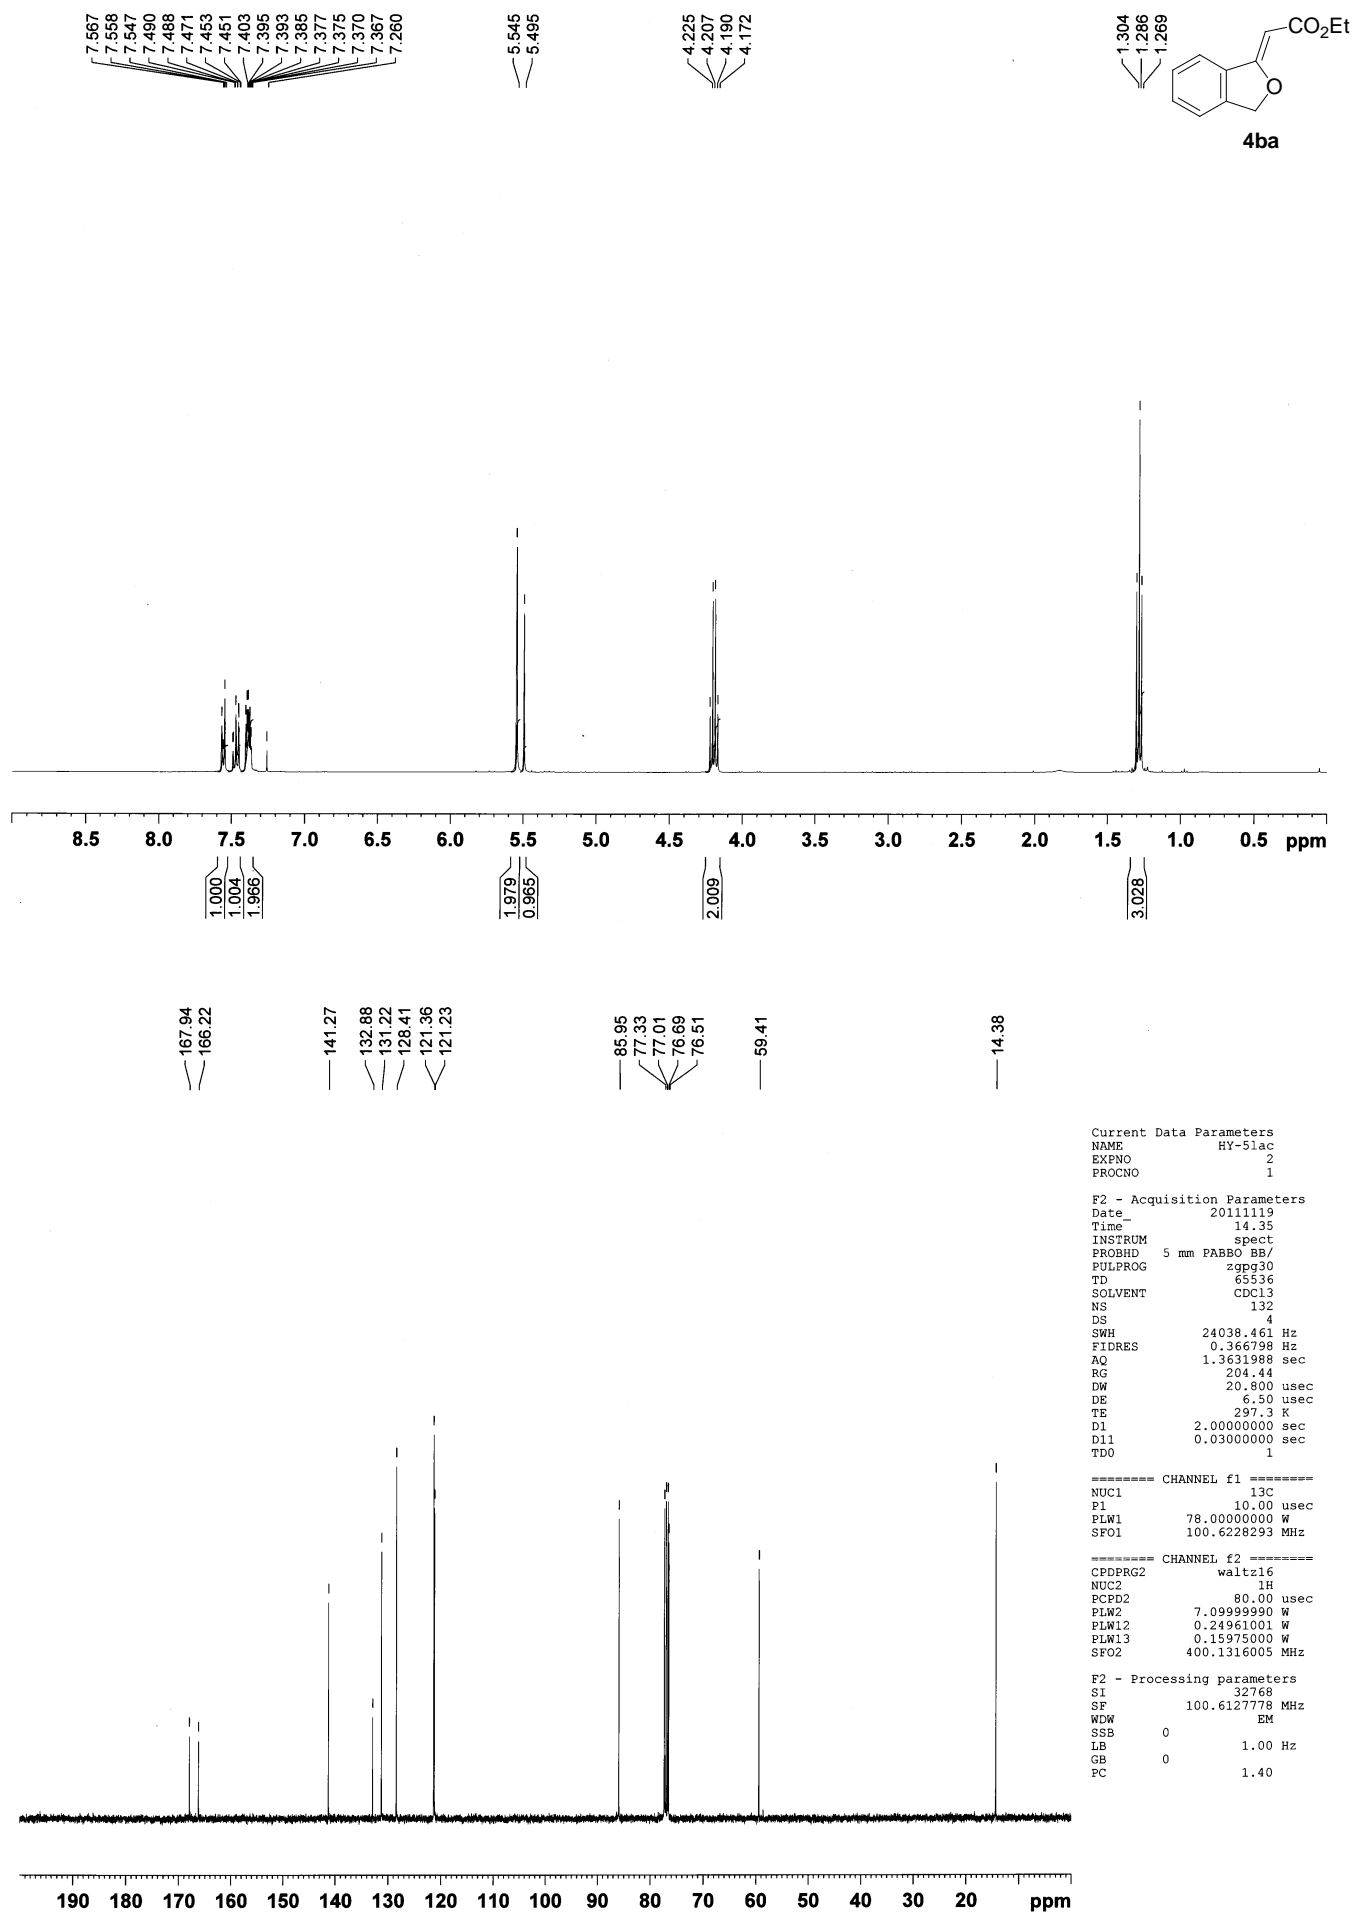

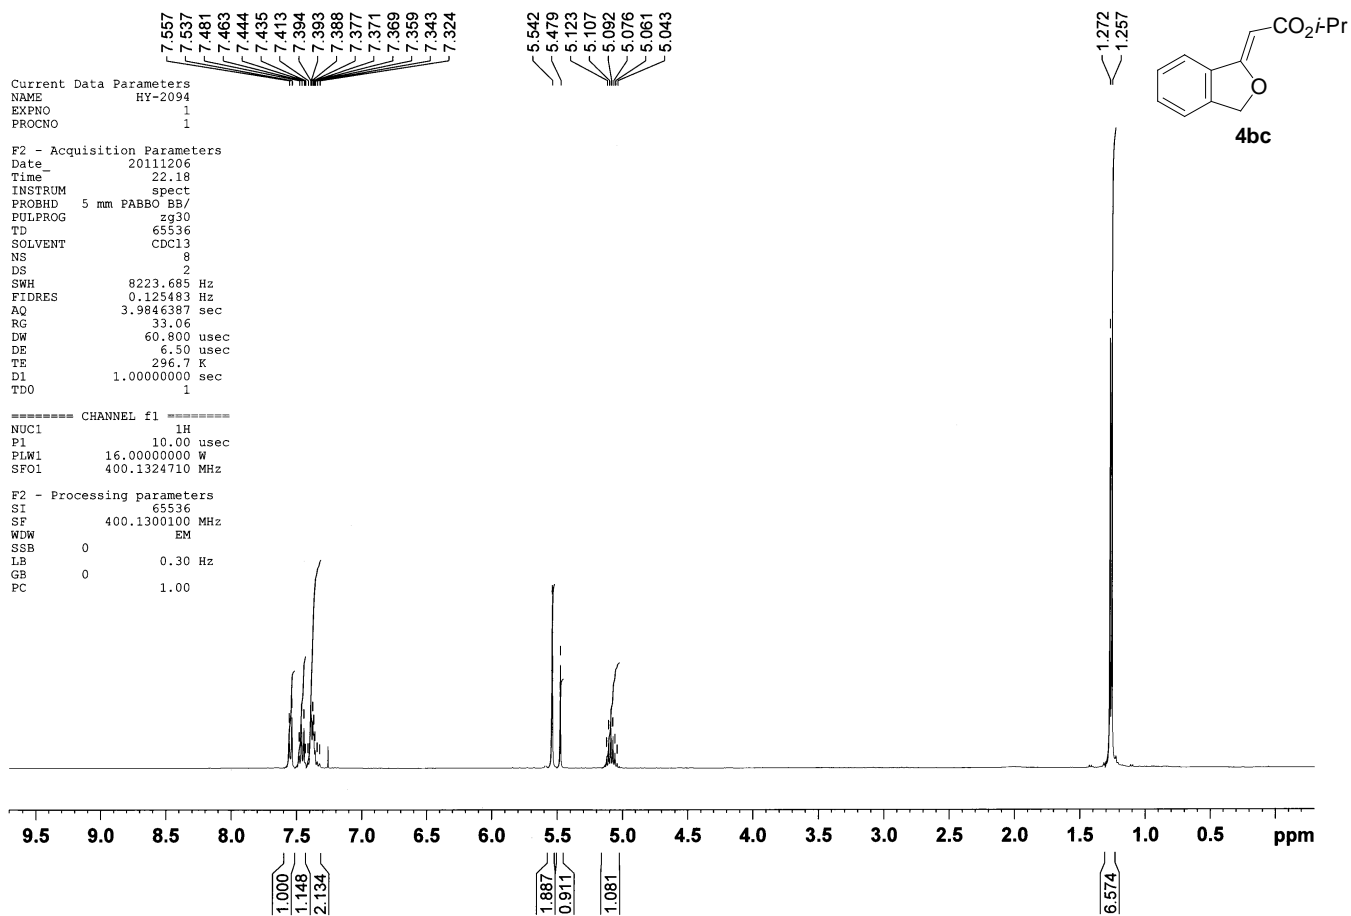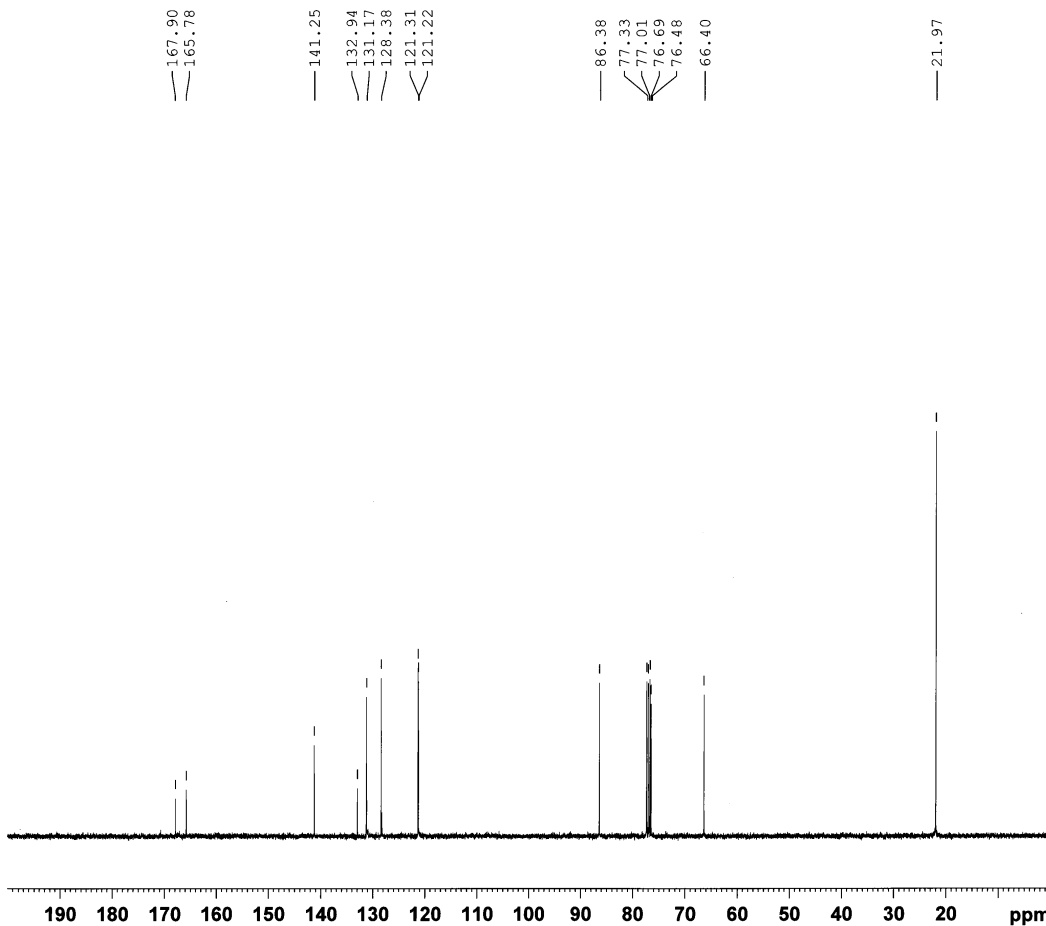

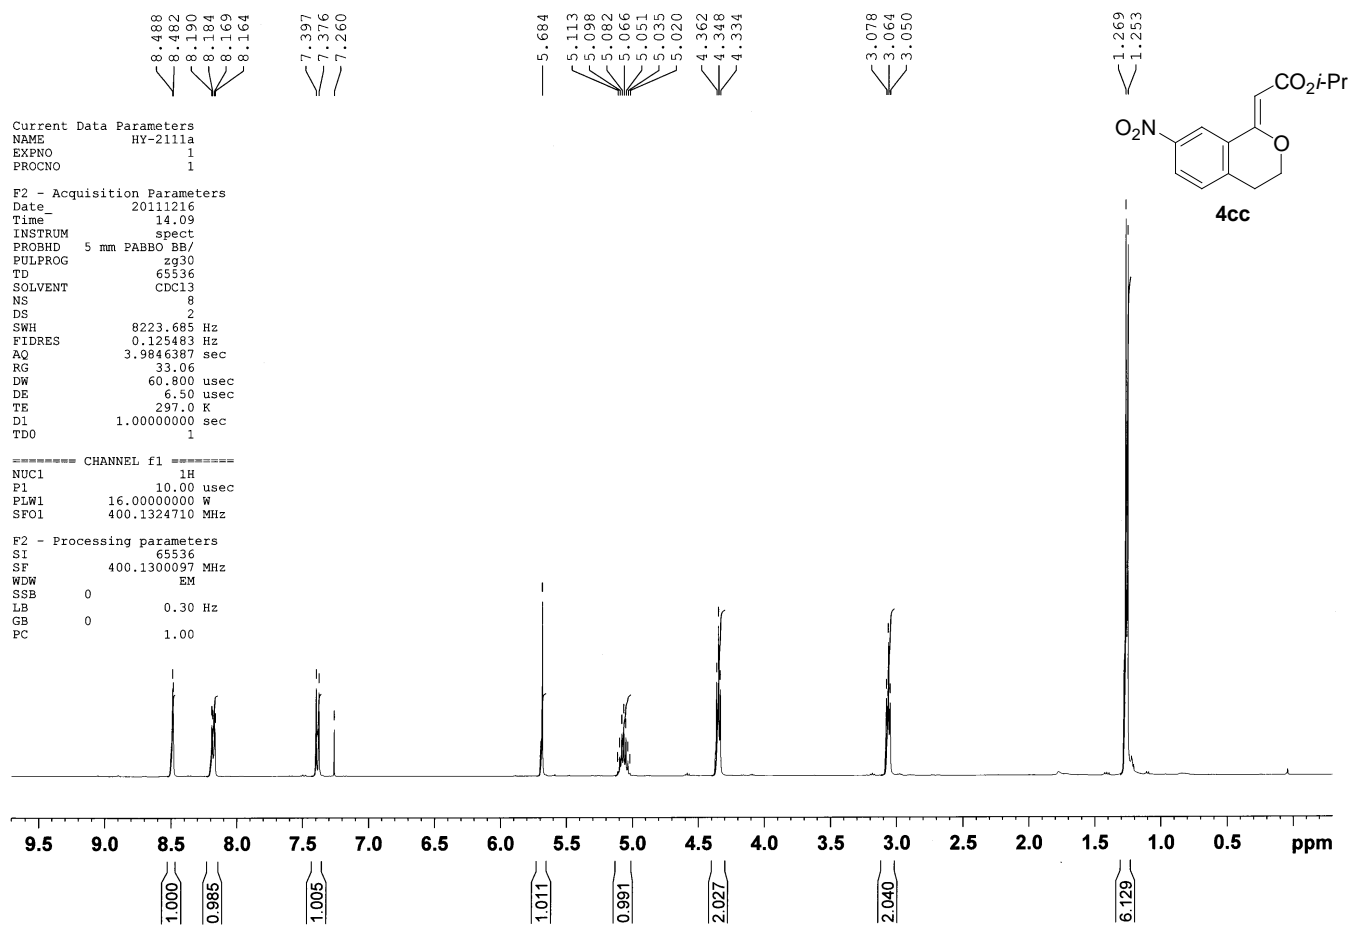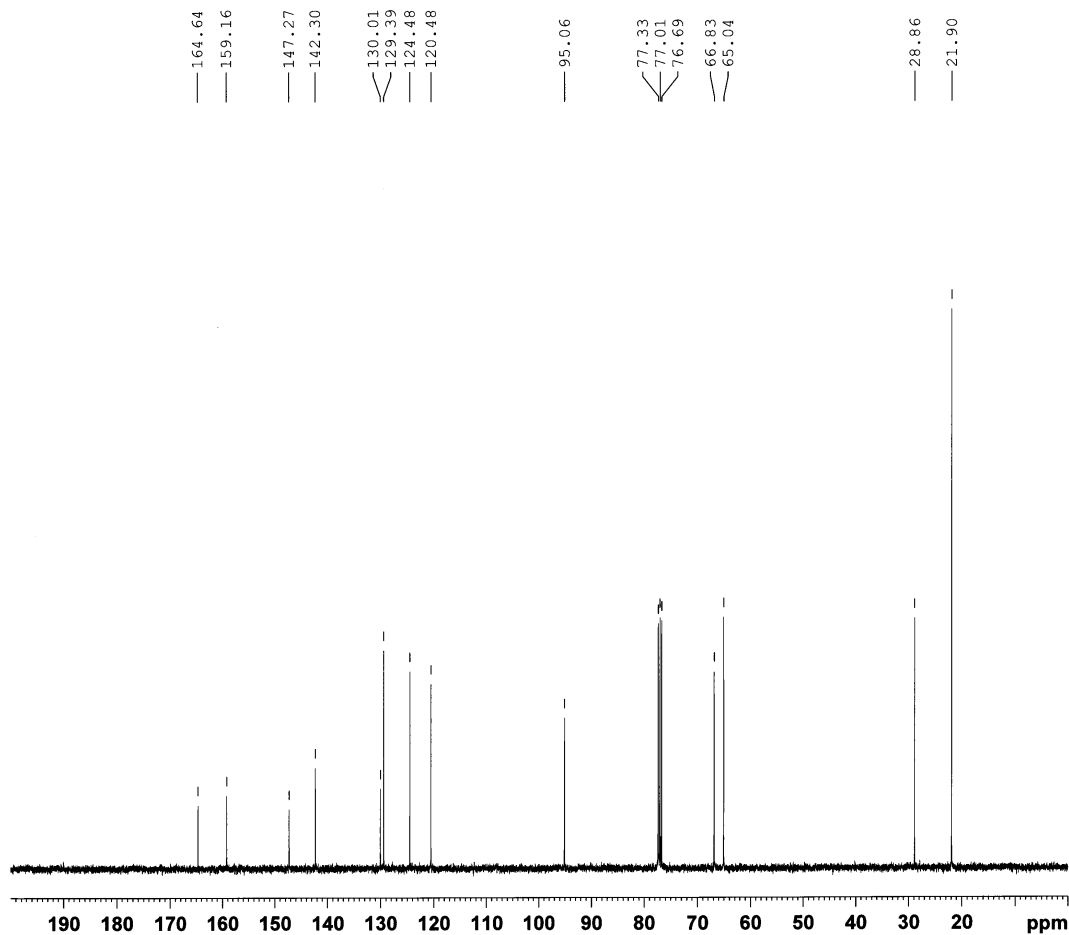

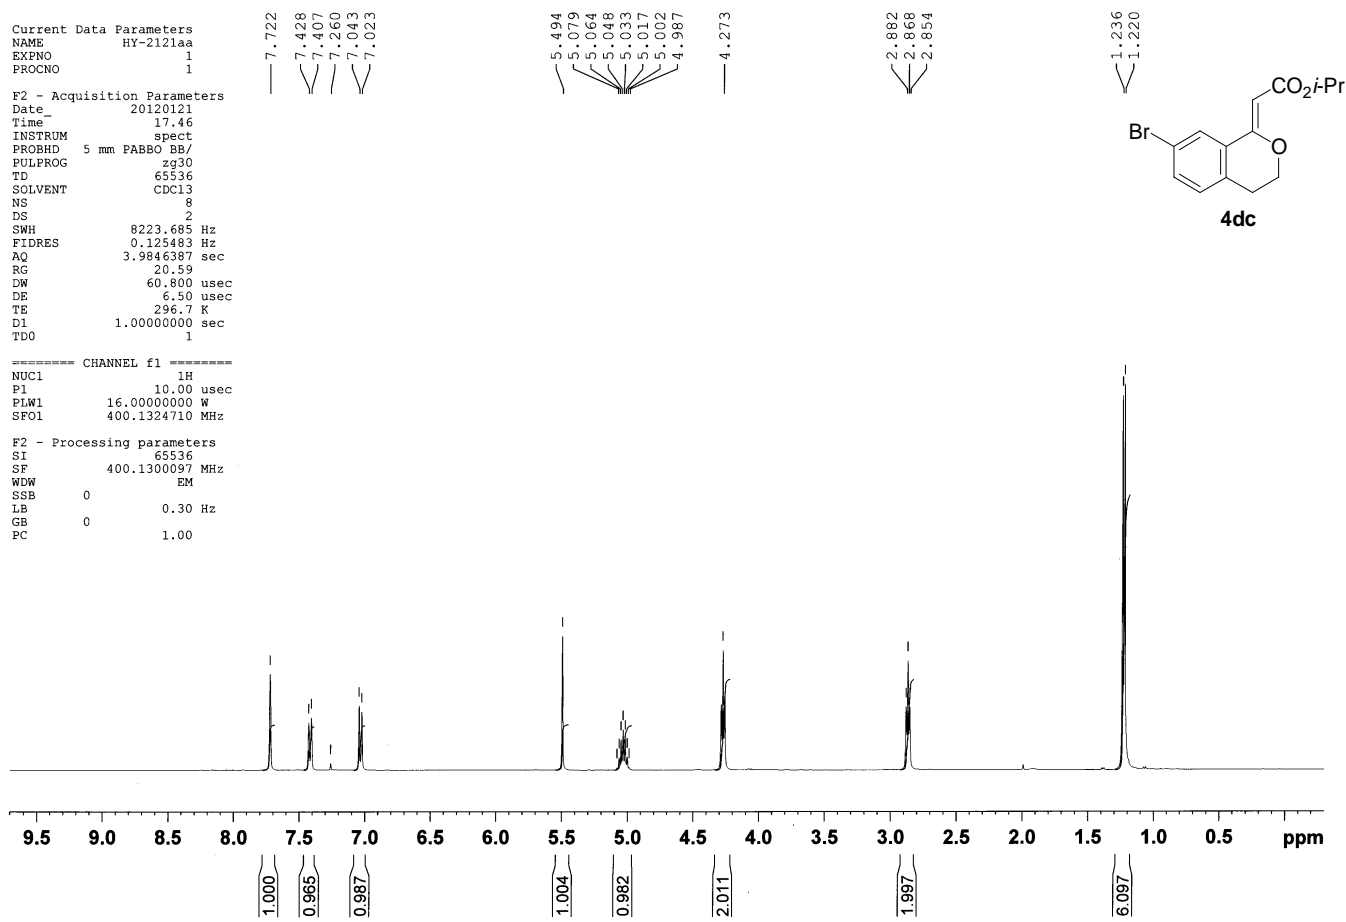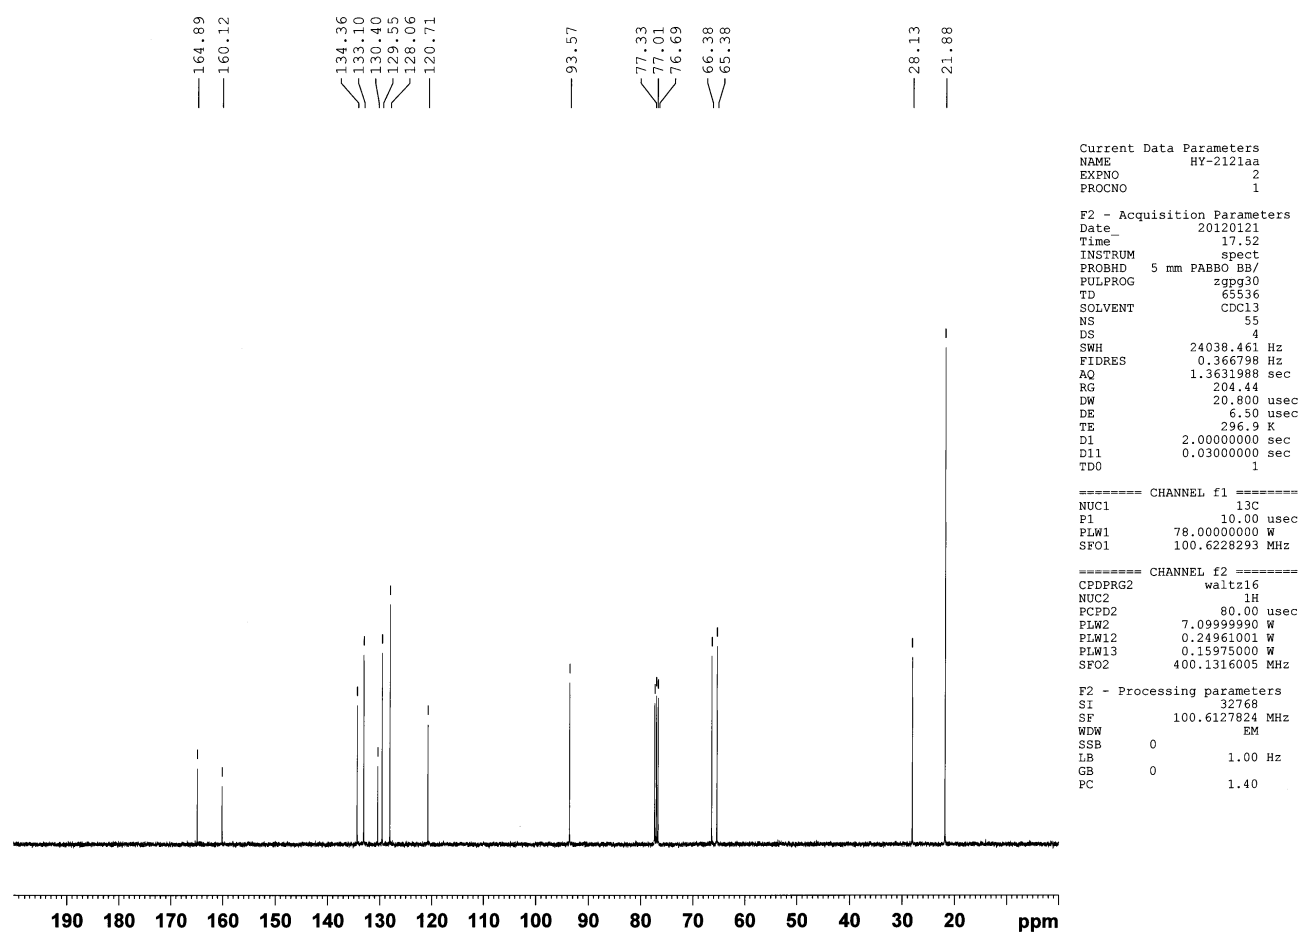

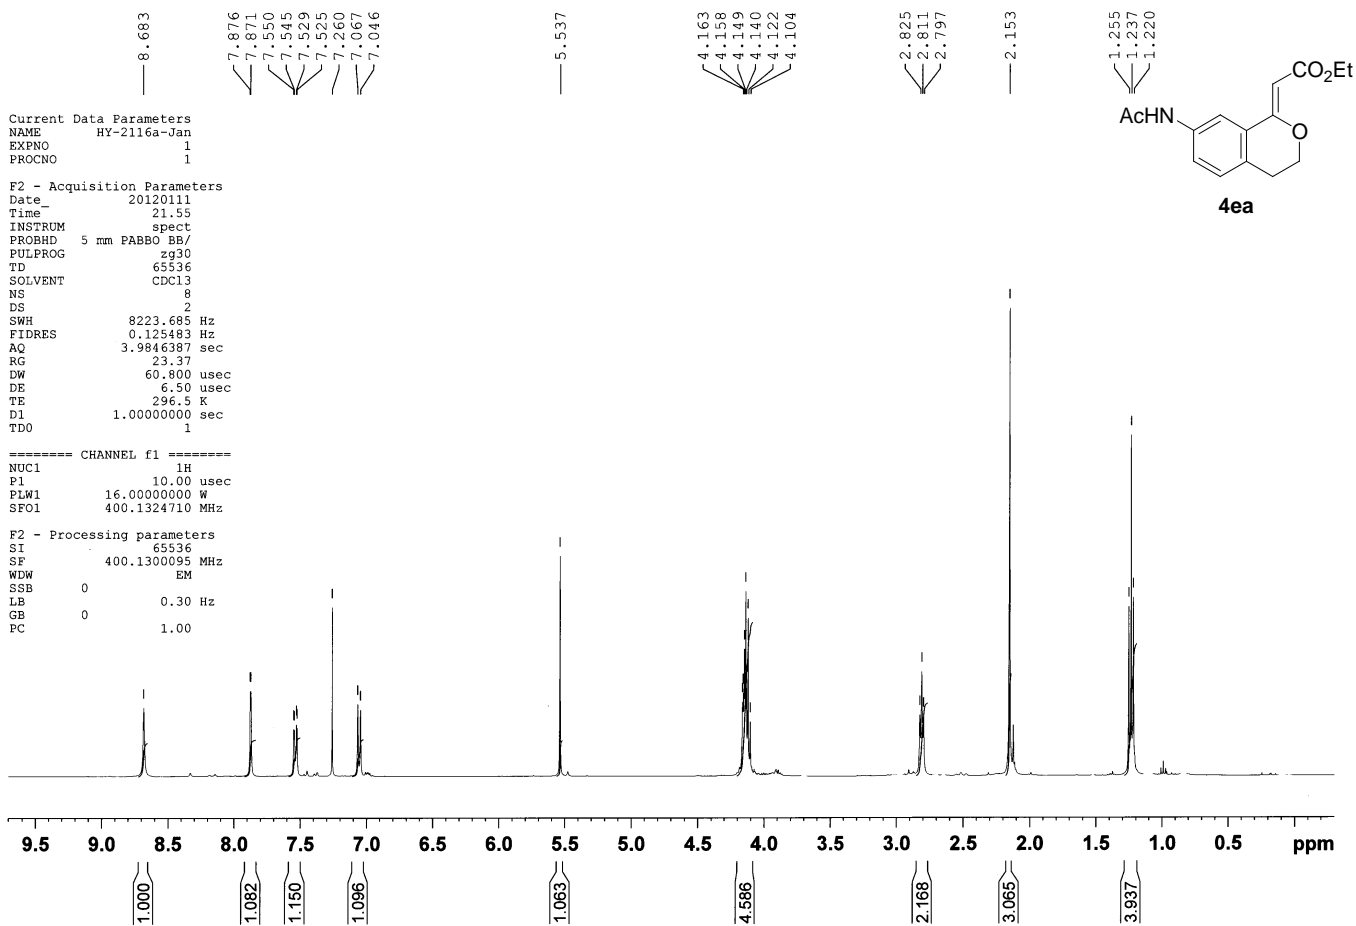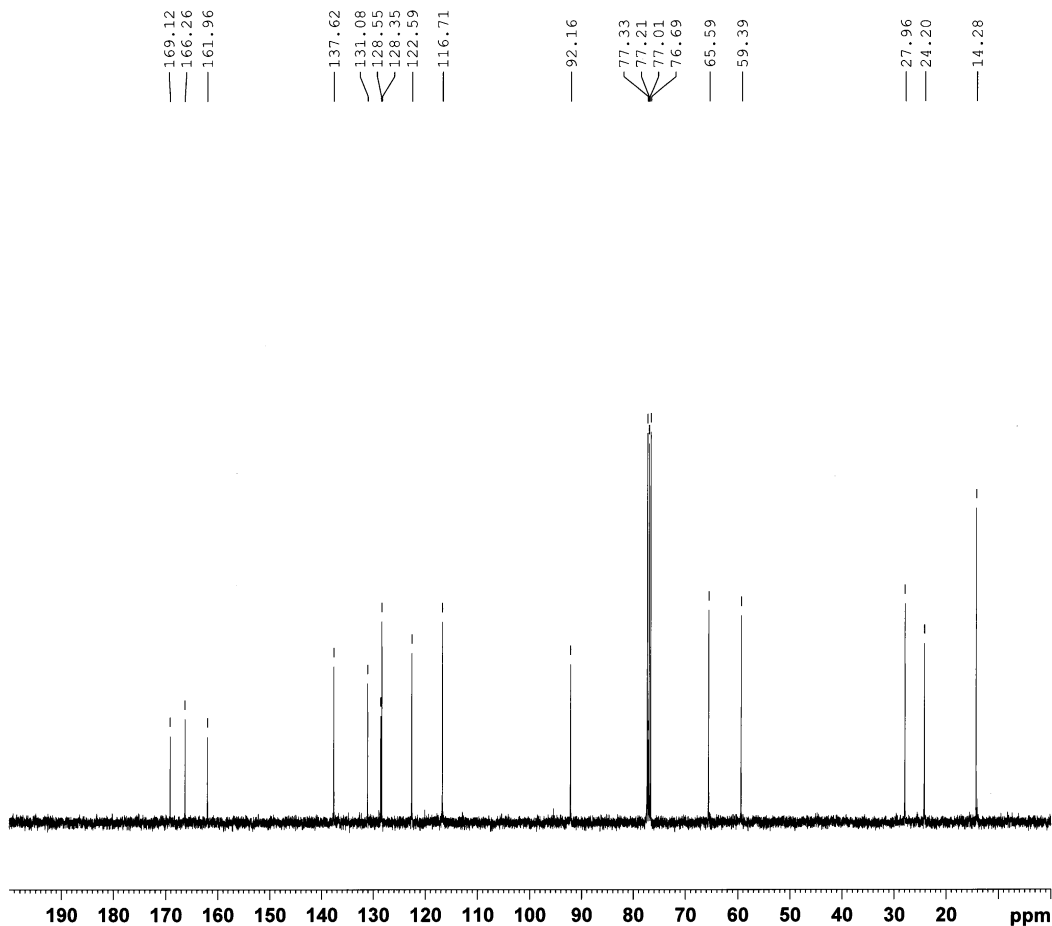



7.887  
7.871  
7.867  
7.791  
7.788  
7.770  
7.768  
7.581  
7.578  
7.560  
7.558  
7.543  
7.540  
7.407  
7.404  
7.388  
7.386  
7.383  
7.368  
7.365  
7.362  
7.348  
7.345  
7.330  
7.327  
7.309  
7.306  
7.260  
7.200  
7.197  
7.183  
7.181  
7.179  
7.177  
7.163  
7.159  
5.848  
4.285  
4.267  
4.249  
4.231

Current Data Parameters  
 NAME HY-2129aaa  
 EXPNO 1  
 PROCNO 1

F2 - Acquisition Parameters  
 Date\_ 20120131  
 Time 23.54  
 INSTRUM spect  
 PROBHD 5 mm PABBO BB/  
 PULPROG zg30  
 TD 65536  
 SOLVENT CDCl3  
 NS 8  
 DS 2  
 SWH 8223.685 Hz  
 FIDRES 0.125483 Hz  
 AQ 3.9846387 sec  
 RG 55.5  
 DW 60.800 usec  
 DE 6.50 usec  
 TE 296.6 K  
 D1 1.00000000 sec  
 TDO 1

===== CHANNEL f1 =====  
 NUC1 1H  
 P1 10.00 usec  
 PLW1 16.00000000 W  
 SFO1 400.1324710 MHz

F2 - Processing parameters  
 SI 65536  
 SF 400.1300097 MHz  
 WDW EM  
 SSB 0  
 LB 0.30 Hz  
 GB 0  
 PC 1.00

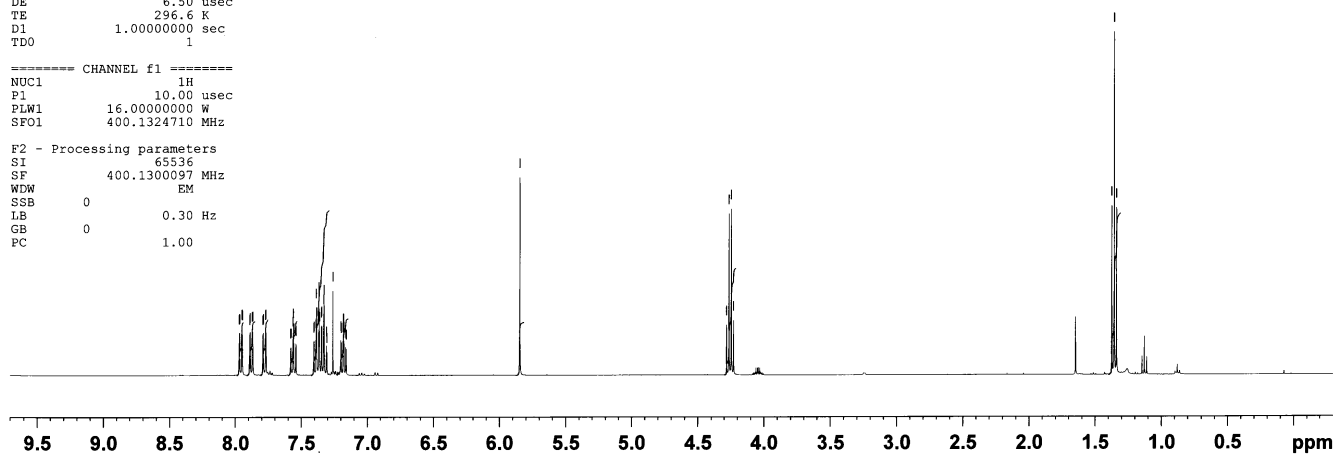

165.44  
158.75  
150.61  
131.81  
130.14  
129.41  
128.76  
124.83  
124.31  
123.63  
122.23  
121.89  
118.26  
117.37  
91.31  
77.33  
77.01  
76.69  
59.52  
14.48

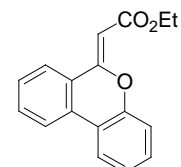

4fa

1.375  
1.358  
1.340

Current Data Parameters  
 NAME HY-2129aaa  
 EXPNO 2  
 PROCNO 1

F2 - Acquisition Parameters  
 Date\_ 20120131  
 Time 23.58  
 INSTRUM spect  
 PROBHD 5 mm PABBO BB/  
 PULPROG zgpg30  
 TD 65536  
 SOLVENT CDCl3  
 NS 187  
 DS 4  
 SWH 24038.461 Hz  
 FIDRES 0.366798 Hz  
 AQ 1.3631988 sec  
 RG 204.44  
 DW 20.800 usec  
 DE 6.50 usec  
 TE 296.6 K  
 D1 2.00000000 sec  
 D11 0.03000000 sec  
 TDO 1

===== CHANNEL f1 =====  
 NUC1 13C  
 P1 10.00 usec  
 PLW1 78.00000000 W  
 SFO1 100.6228293 MHz

===== CHANNEL f2 =====  
 CPDPRG2 waltz16  
 NUC2 1H  
 FCPD2 80.00 usec  
 PLW2 7.09999990 W  
 PLW12 0.24961001 W  
 PLW13 0.15975000 W  
 SFO2 400.1316005 MHz

F2 - Processing parameters  
 SI 32768  
 SF 100.6127707 MHz  
 WDW EM  
 SSB 0  
 LB 1.00 Hz  
 GB 0  
 PC 1.40

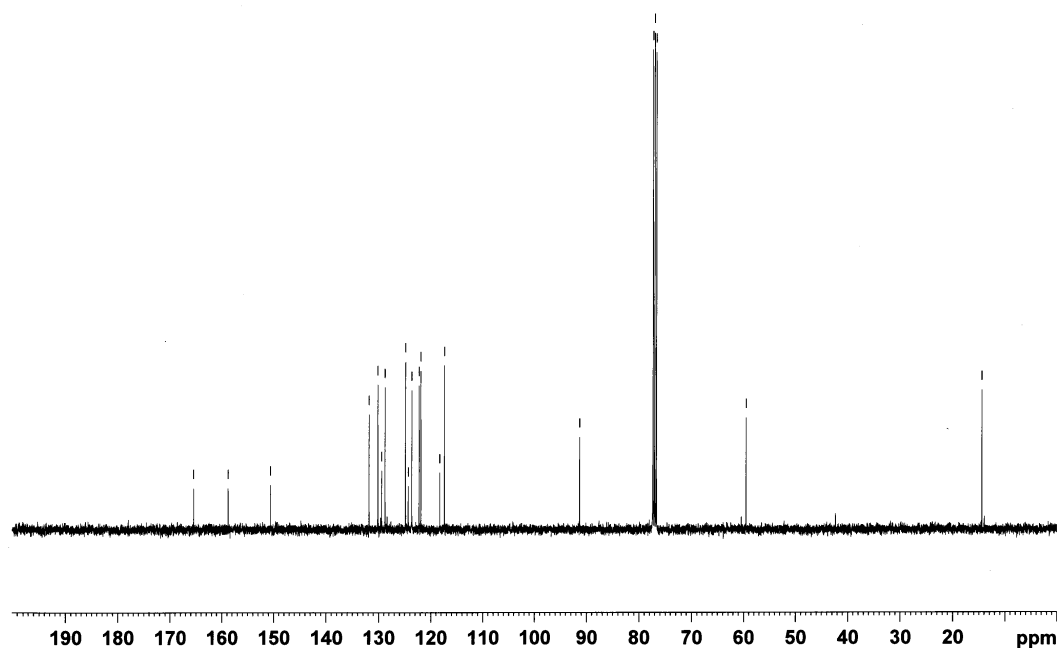

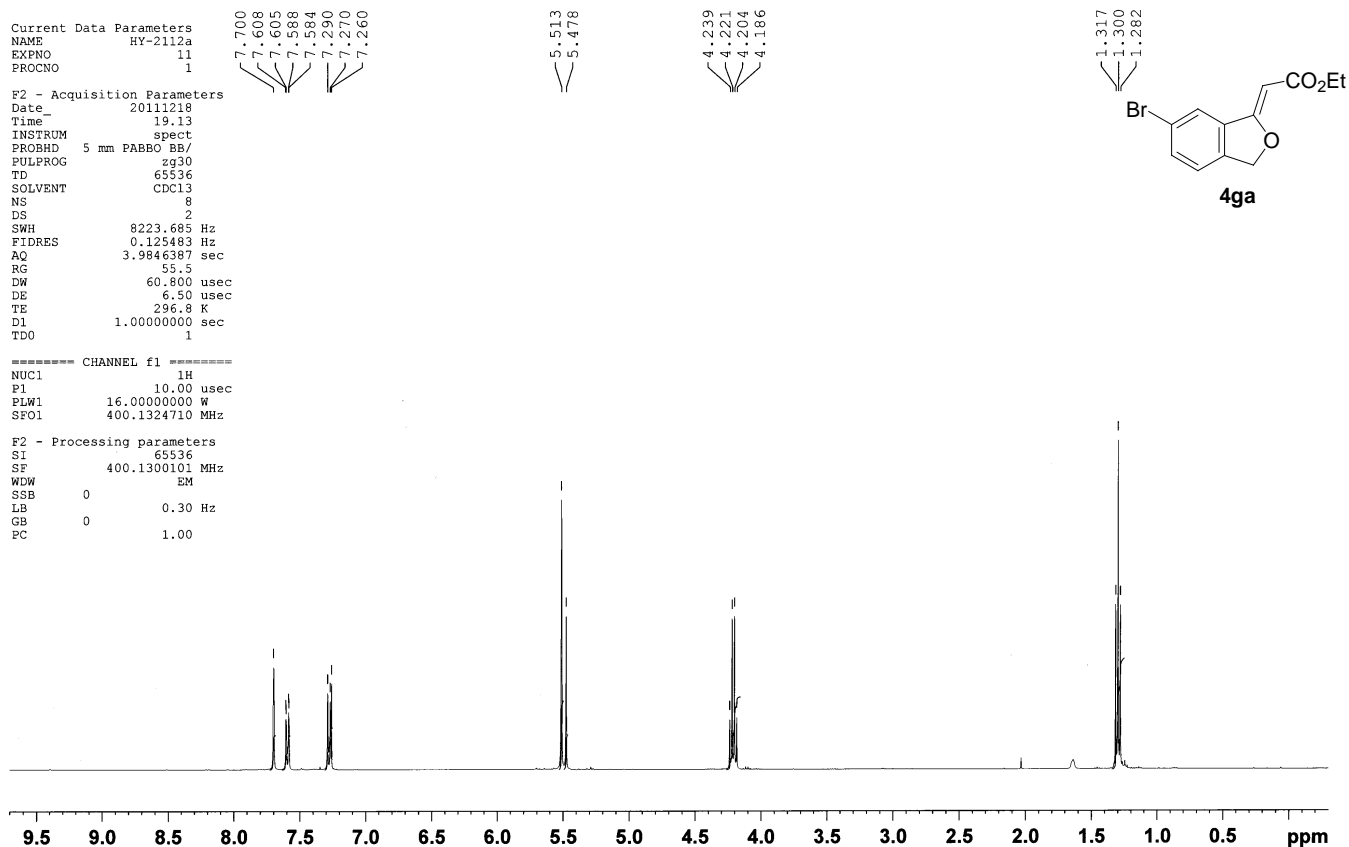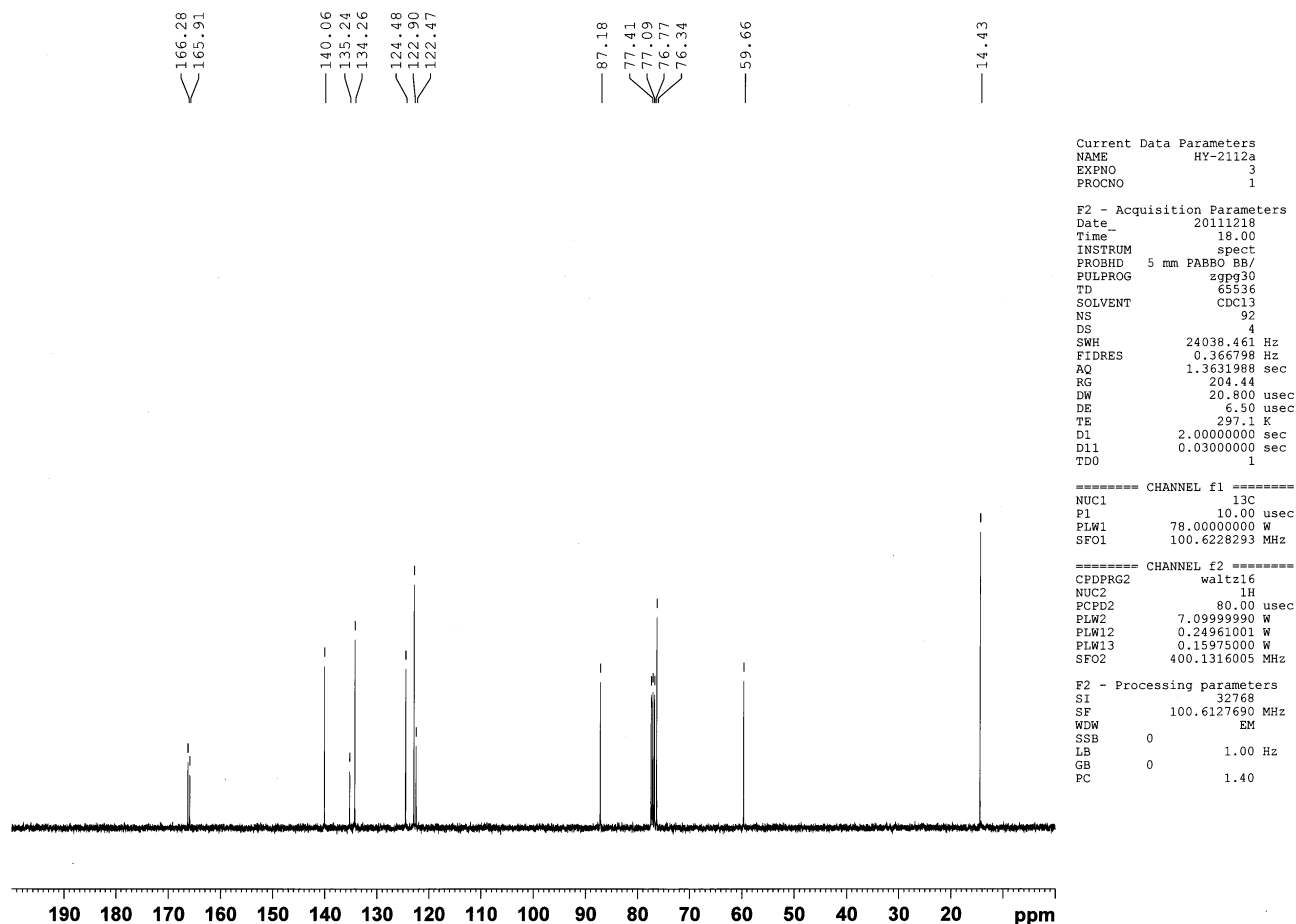

Current Data Parameters  
 NAME HY-2090b  
 EXPNO 1  
 PROCNO 1  
 F2 - Acquisition Parameters  
 Date\_ 20111202  
 Time 12.47  
 INSTRUM spect  
 PROBHD 5 mm PABBO BB/  
 PULPROG zg30  
 TD 65536  
 SOLVENT CDCl3  
 NS 8  
 DS 0  
 SWH 8223.685 Hz  
 FIDRES 0.125483 Hz  
 AQ 3.9846387 sec  
 RG 55.5  
 DW 60.800 usec  
 DE 6.50 usec  
 TE 296.5 K  
 D1 1.0000000 sec  
 TD0 1

===== CHANNEL f1 =====  
 NUC1 1H  
 P1 10.00 usec  
 PLW1 16.0000000 W  
 SFO1 400.1324710 MHz  
 F2 - Processing parameters  
 SI 65536  
 SF 400.1300096 MHz  
 WDW EM  
 SSB 0  
 LB 0.30 Hz  
 GB 0  
 PC 1.00

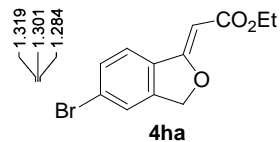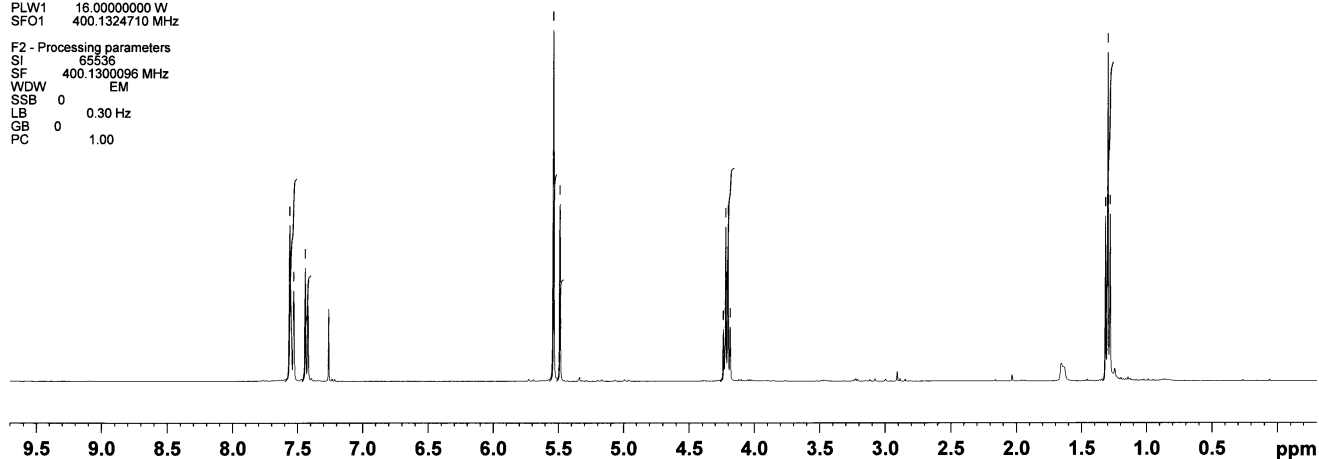

166.79  
 166.00  
 143.14  
 132.07  
 131.95  
 125.72  
 124.76  
 122.67  
 86.74  
 77.31  
 77.00  
 76.68  
 75.84  
 59.63  
 14.41

Current Data Parameters  
 NAME HY-2090b  
 EXPNO 2  
 PROCNO 1  
 F2 - Acquisition Parameters  
 Date\_ 20111202  
 Time 12.50  
 INSTRUM spect  
 PROBHD 5 mm PABBO BB/  
 PULPROG zgpg30  
 TD 65536  
 SOLVENT CDCl3  
 NS 90  
 DS 4  
 SWH 24038.461 Hz  
 FIDRES 0.336798 Hz  
 AQ 1.3631988 sec  
 RG 204.44  
 DW 20.800 usec  
 DE 6.50 usec  
 TE 296.7 K  
 D1 2.0000000 sec  
 D11 0.0300000 sec  
 TD0 1

===== CHANNEL f1 =====  
 NUC1 13C  
 P1 10.00 usec  
 PLW1 78.0000000 W  
 SFO1 100.6228293 MHz  
 ===== CHANNEL f2 =====  
 CPDPRG2 waltz16  
 NUC2 1H  
 ECPD2 80.00 usec  
 PLW2 7.09999990 W  
 PLW12 0.24961001 W  
 PLW13 0.15975000 W  
 SFO2 400.1316005 MHz

F2 - Processing parameters  
 SI 32768  
 SF 100.6127734 MHz  
 WDW EM  
 SSB 0  
 LB 1.00 Hz  
 GB 0  
 PC 1.40

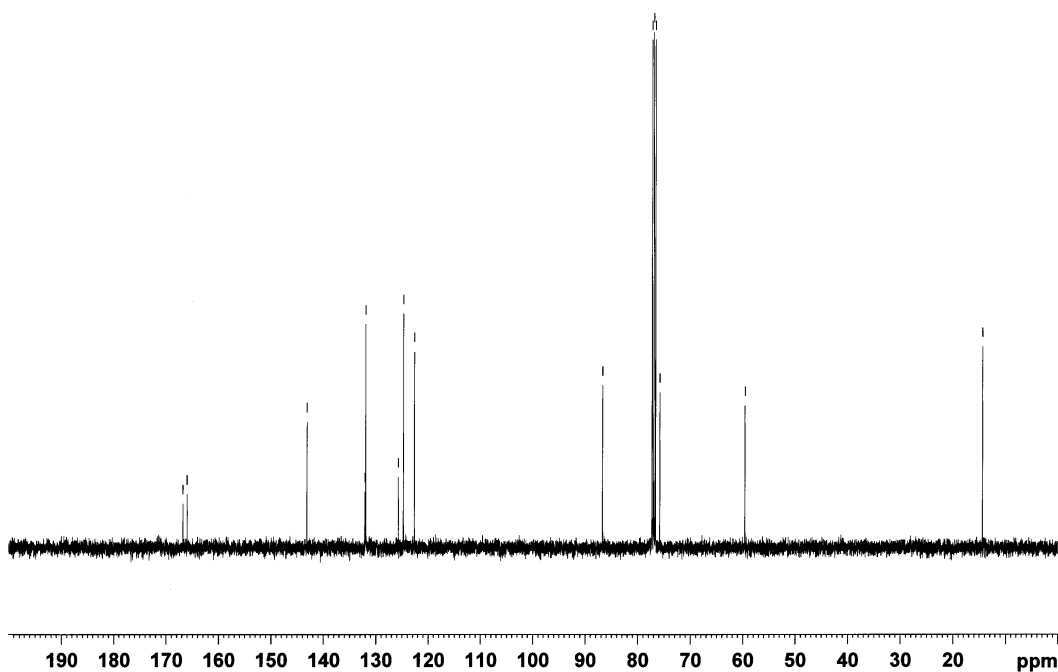

Current Data Parameters  
 NAME HY-CBA07-4ia  
 EXPNO 1  
 PROCNO 1

F2 - Acquisition Parameters  
 Date\_ 20120228  
 Time\_ 11.54  
 INSTRUM spect  
 PROBHD 5 mm PABBO BB/  
 PULPROG zg30  
 TD 65536  
 SOLVENT CDCl3  
 NS 8  
 DS 2  
 SWH 8223.685 Hz  
 FIDRES 0.125483 Hz  
 AQ 3.9845387 sec  
 RG 72.93  
 DW 60.800 usec  
 DE 6.50 usec  
 TE 296.5 K  
 D1 1.00000000 sec  
 TD0 1

===== CHANNEL f1 =====  
 NUC1 1H  
 P1 10.00 usec  
 PLW1 16.00000000 W  
 SFO1 400.1324710 MHz

F2 - Processing parameters  
 SI 65536  
 SF 400.1300100 MHz  
 WDW EM  
 SSB 0  
 LB 0.30 Hz  
 GB 0  
 PC 1.00

7.755  
 7.445  
 7.426  
 7.261  
 7.142  
 7.122

5.608

4.338  
 4.324  
 4.310  
 4.212  
 4.194  
 4.176  
 4.159

2.965  
 2.951  
 2.937

1.310  
 1.292  
 1.275

0.255

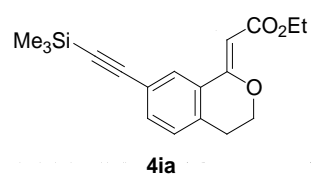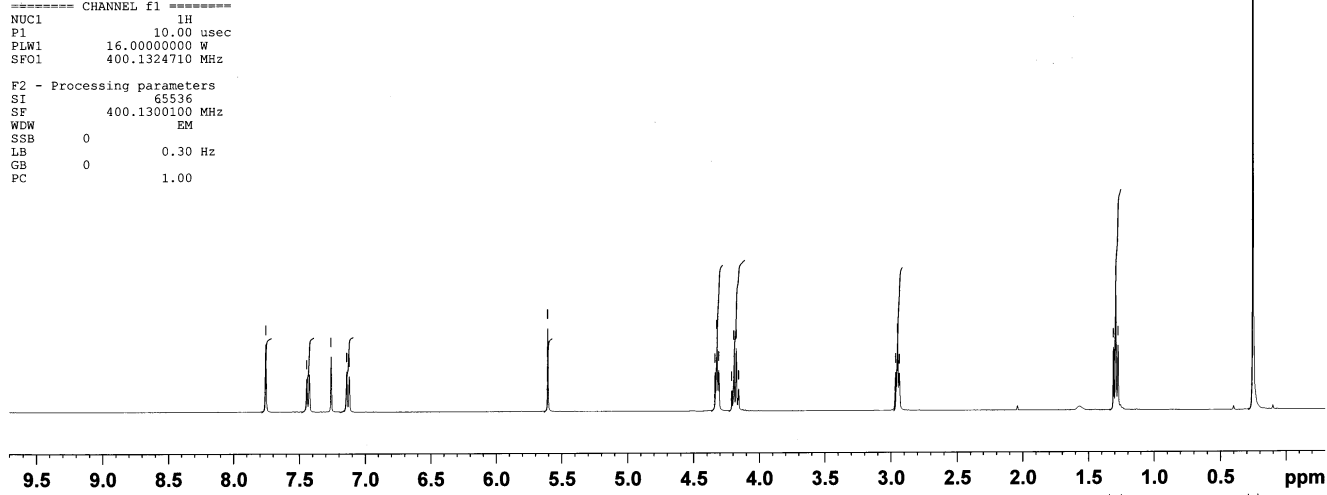

165.70  
 161.06  
 135.87  
 133.45  
 129.03  
 128.68  
 128.06  
 122.43  
 103.78  
 94.95  
 92.79  
 77.33  
 77.01  
 76.69  
 65.49  
 59.41  
 28.62  
 14.38  
 -0.15

Current Data Parameters  
 NAME HY-CBA07-4ia  
 EXPNO 2  
 PROCNO 1

F2 - Acquisition Parameters  
 Date\_ 20120228  
 Time\_ 11.46  
 INSTRUM spect  
 PROBHD 5 mm PABBO BB/  
 PULPROG zgpg30  
 TD 65536  
 SOLVENT CDCl3  
 NS 35  
 DS 4  
 SWH 24038.461 Hz  
 FIDRES 0.366798 Hz  
 AQ 1.3631988 sec  
 RG 204.44  
 DW 20.800 usec  
 DE 6.50 usec  
 TE 296.4 K  
 D1 2.00000000 sec  
 D11 0.03000000 sec  
 TD0 1

===== CHANNEL f1 =====  
 NUC1 13C  
 P1 10.00 usec  
 PLW1 78.00000000 W  
 SFO1 100.6228293 MHz

===== CHANNEL f2 =====  
 CPDPRG2 waltz16  
 NUC2 1H  
 PCPD2 80.00 usec  
 PLW2 7.09999990 W  
 PLW12 0.24961001 W  
 PLW13 0.15975000 W  
 SFO2 400.1316005 MHz

F2 - Processing parameters  
 SI 32768  
 SF 100.6127729 MHz  
 WDW EM  
 SSB 0  
 LB 1.00 Hz  
 GB 0  
 PC 1.40

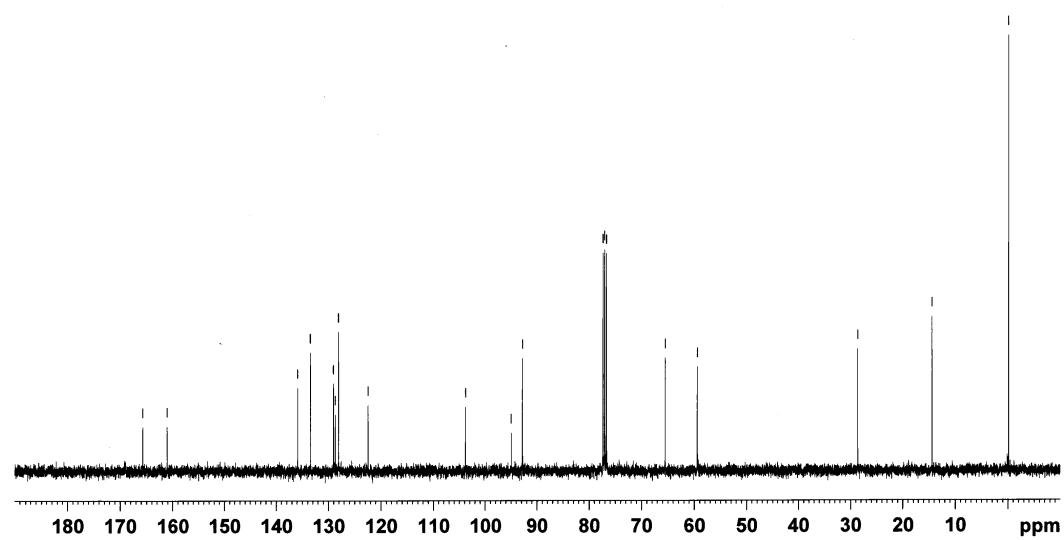

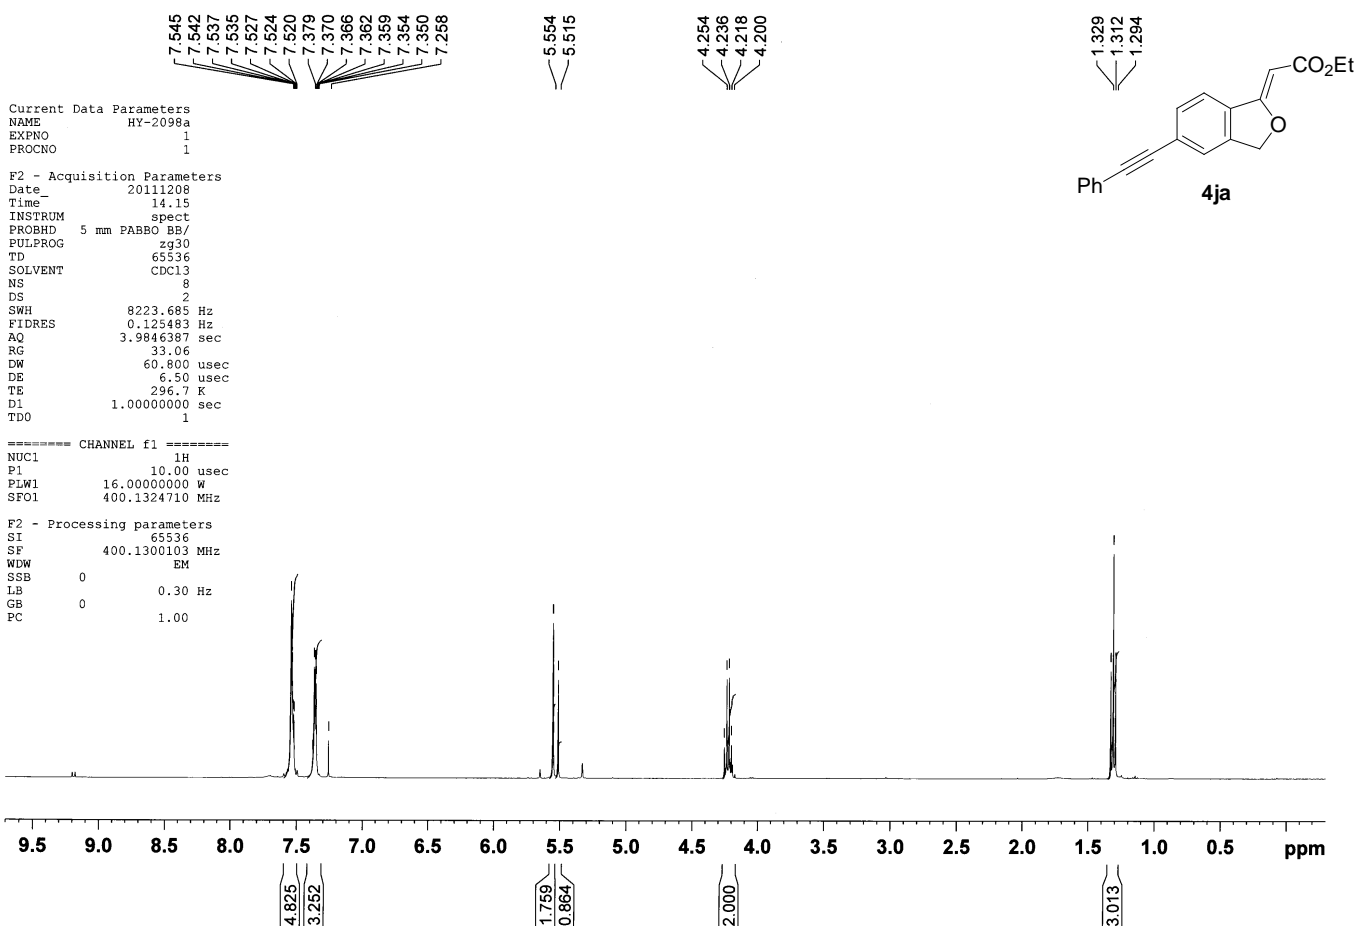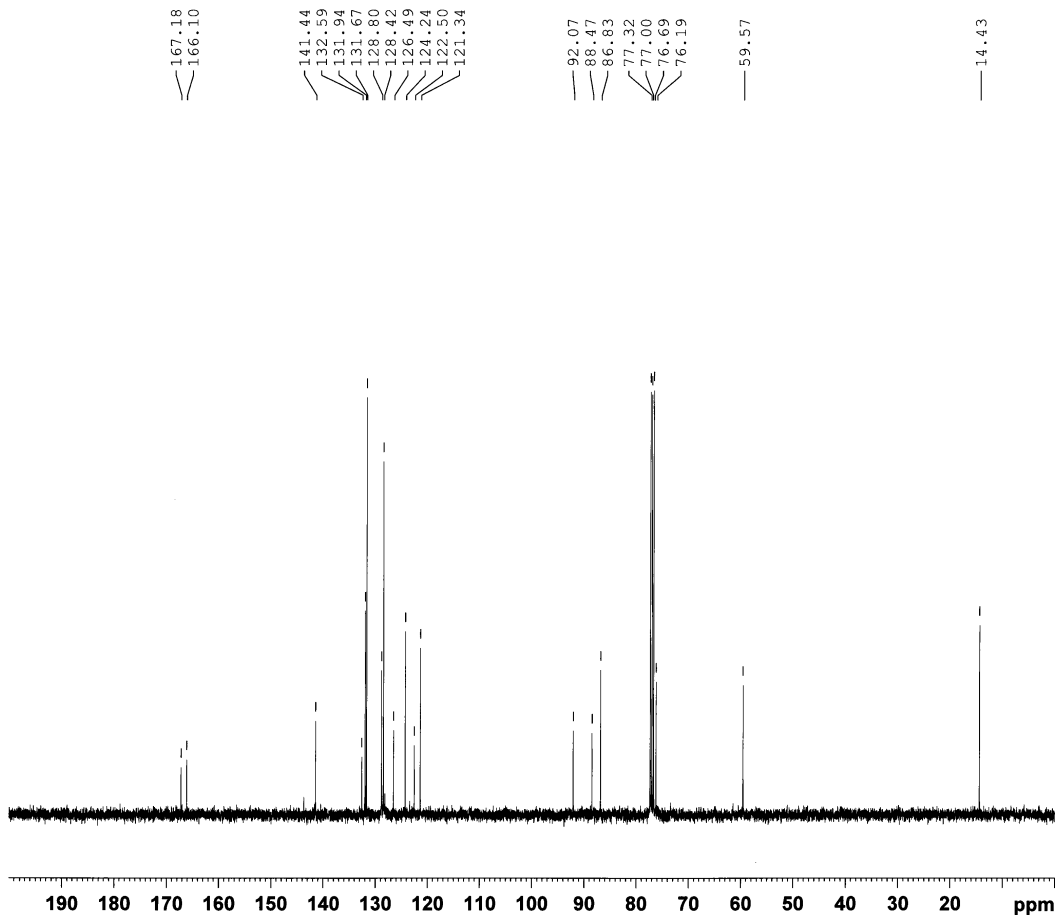

Current Data Parameters  
 NAME HY-2130a  
 EXPNO 1  
 PROCNO 1

F2 - Acquisition Parameters  
 Date 20120131  
 Time 16.51  
 INSTRUM spect  
 PROBHD 5 mm PABBO BB/  
 PULPROG zg30  
 TD 65536  
 SOLVENT CDCl3  
 NS 8  
 DS 2  
 SWH 8223.685 Hz  
 FIDRES 0.125483 Hz  
 AQ 3.9846387 sec  
 RG 33.06  
 DW 60.800 usec  
 DE 6.50 usec  
 TE 296.6 K  
 D1 1.00000000 sec  
 TD0 1

===== CHANNEL f1 =====  
 NUC1 1H  
 P1 10.00 usec  
 PLW1 16.00000000 W  
 SFO1 400.1324710 MHz

F2 - Processing parameters  
 SI 65536  
 SF 400.1300097 MHz  
 WDM EM  
 SSB 0  
 LB 0.30 Hz  
 GB 0  
 PC 1.00

7.463  
 7.260  
 7.222  
 7.219  
 7.203  
 7.199  
 7.102  
 7.082

5.599

4.336  
 4.322  
 4.308

3.724

2.933  
 2.919  
 2.905  
 2.631  
 2.618  
 2.610  
 2.600  
 2.587

0.872  
 0.859  
 0.850  
 0.840  
 0.828

0.021

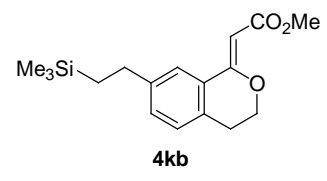

9.5 9.0 8.5 8.0 7.5 7.0 6.5 6.0 5.5 5.0 4.5 4.0 3.5 3.0 2.5 2.0 1.5 1.0 0.5 ppm

1.000  
 1.008  
 1.124

1.000

2.031

3.082

2.118  
 2.399

2.355

8.461

168.23  
 164.34

146.32

134.72  
 132.22  
 130.05  
 129.72  
 126.42

93.16

79.12  
 78.81  
 78.49

67.66

52.58

31.64  
 30.07

20.50

0.00

Current Data Parameters  
 NAME HY-2130a  
 EXPNO 2  
 PROCNO 1

F2 - Acquisition Parameters  
 Date 20120131  
 Time 16.56  
 INSTRUM spect  
 PROBHD 5 mm PABBO BB/  
 PULPROG zg30  
 TD 65536  
 SOLVENT CDCl3  
 NS 87  
 DS 4  
 SWH 24038.461 Hz  
 FIDRES 0.366798 Hz  
 AQ 1.3631988 sec  
 RG 204.44  
 DW 20.800 usec  
 DE 6.50 usec  
 TE 297.0 K  
 D1 2.00000000 sec  
 D11 0.03000000 sec  
 TD0 1

===== CHANNEL f1 =====  
 NUC1 13C  
 P1 10.00 usec  
 PLW1 78.00000000 W  
 SFO1 100.6228293 MHz

===== CHANNEL f2 =====  
 CPDPRG2 waltz16  
 NUC2 1H  
 PCPD2 80.00 usec  
 PLW2 7.09999990 W  
 PLW12 0.24961001 W  
 PLW13 0.15975000 W  
 SFO2 400.1316005 MHz

F2 - Processing parameters  
 SI 32768  
 SF 100.6125929 MHz  
 WDM EM  
 SSB 0  
 LB 1.00 Hz  
 GB 0  
 PC 1.40

190 180 170 160 150 140 130 120 110 100 90 80 70 60 50 40 30 20 10 ppm

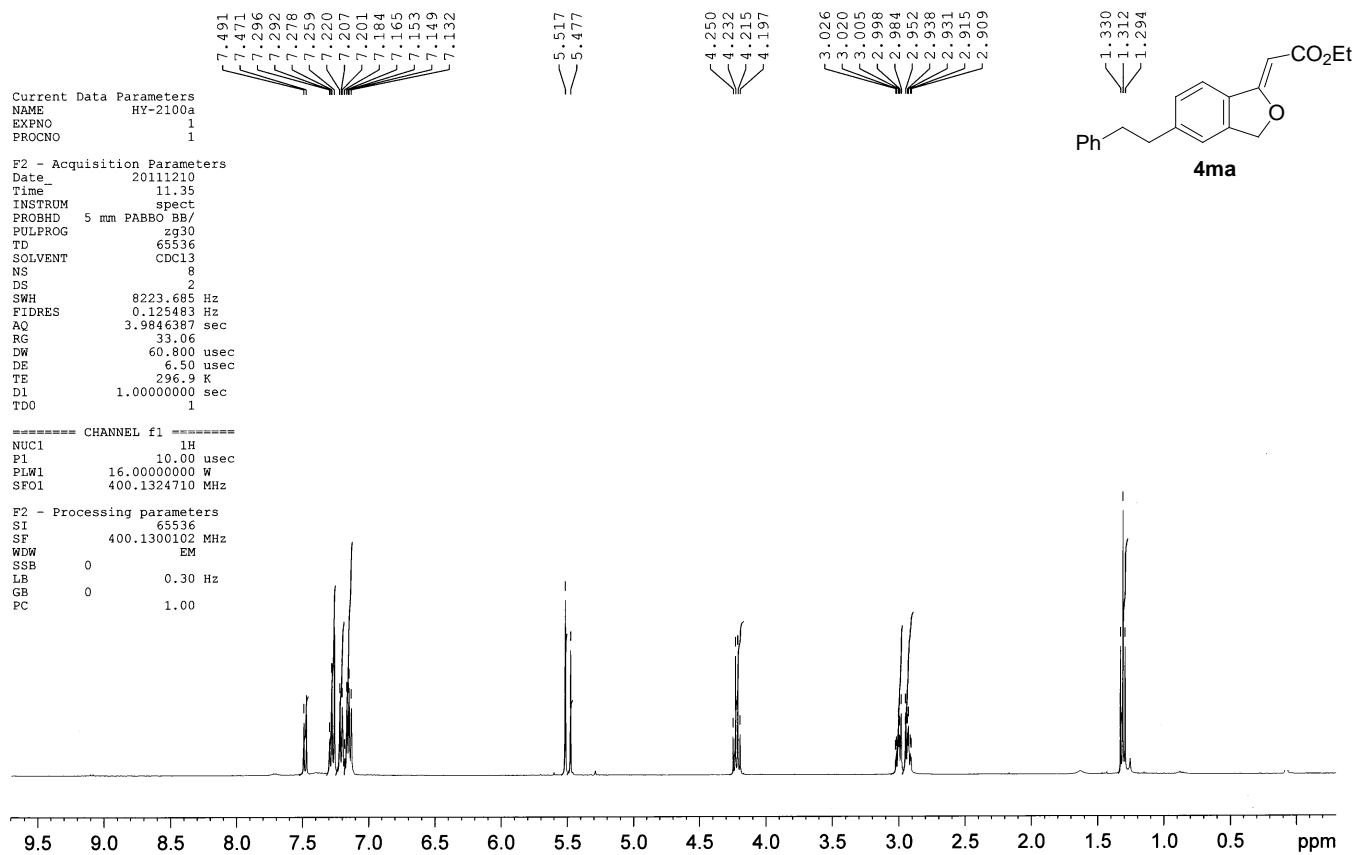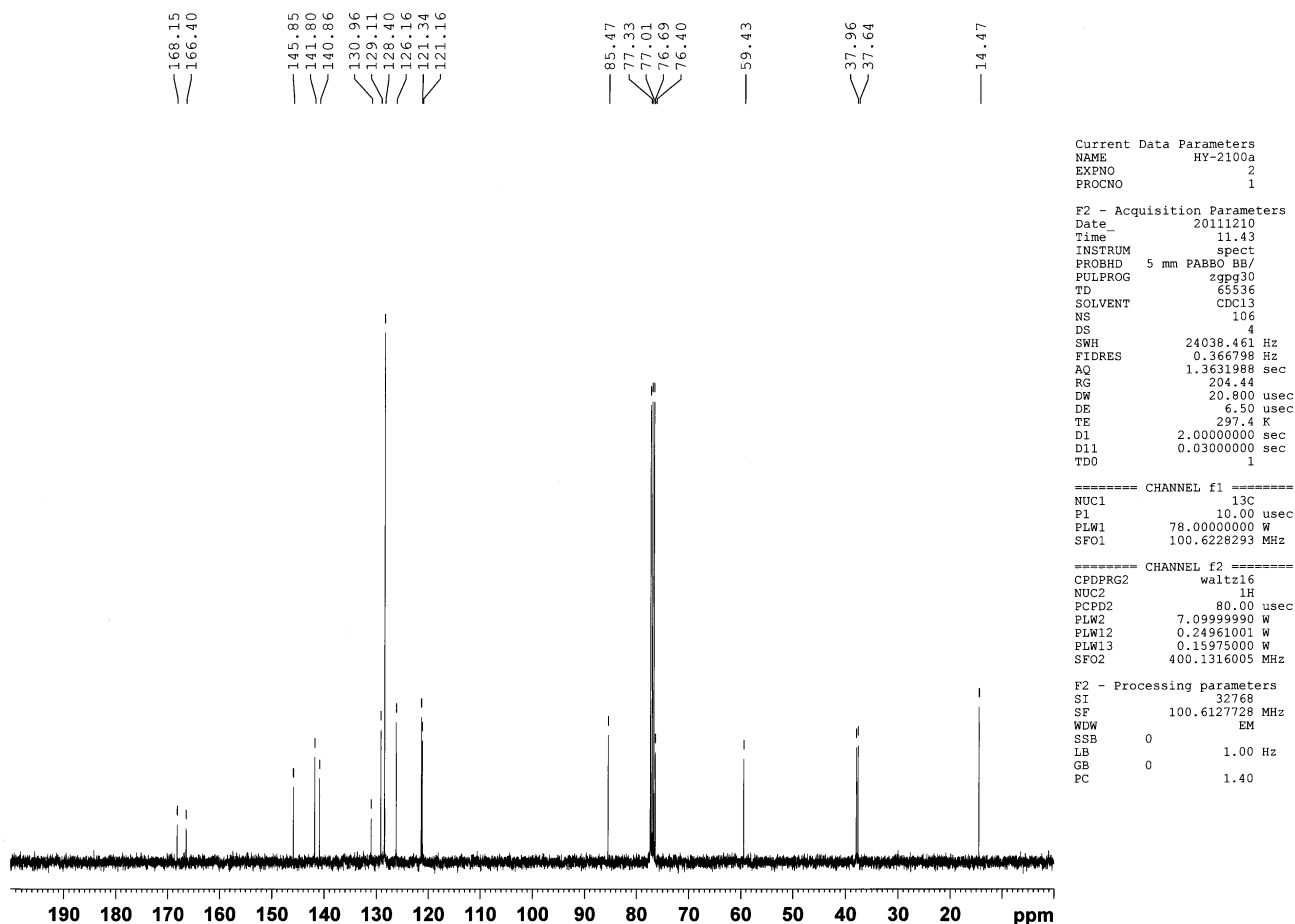

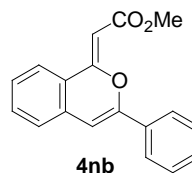

Current Data Parameters  
NAME HY-2132a  
EXPNO 2  
PROCNO 1

F2 - Acquisition Parameters  
Date\_ 20120202  
Time 12.01  
INSTRUM spect  
PROBHD 5 mm PABBO BB/  
PULPROG zgpg30  
TD 65536  
SOLVENT CDCl<sub>3</sub>  
NS 8  
DS 2  
SWH 8223.685 Hz  
FIDRES 0.125483 Hz  
AQ 3.9846387 sec  
RG 45.68  
DW 60.800 usec  
DE 6.50 usec  
TE 296.4 K  
D1 1.0000000 sec  
TDO 1

===== CHANNEL f1 =====  
NUC1 1H  
P1 10.00 usec  
PLW1 16.0000000 W  
SFO1 400.1324710 MHz

F2 - Processing parameters  
SI 65536  
SF 400.1300097 MHz  
WDW EM  
SSB 0  
LB 0.30 Hz  
GB 0  
PC 1.00

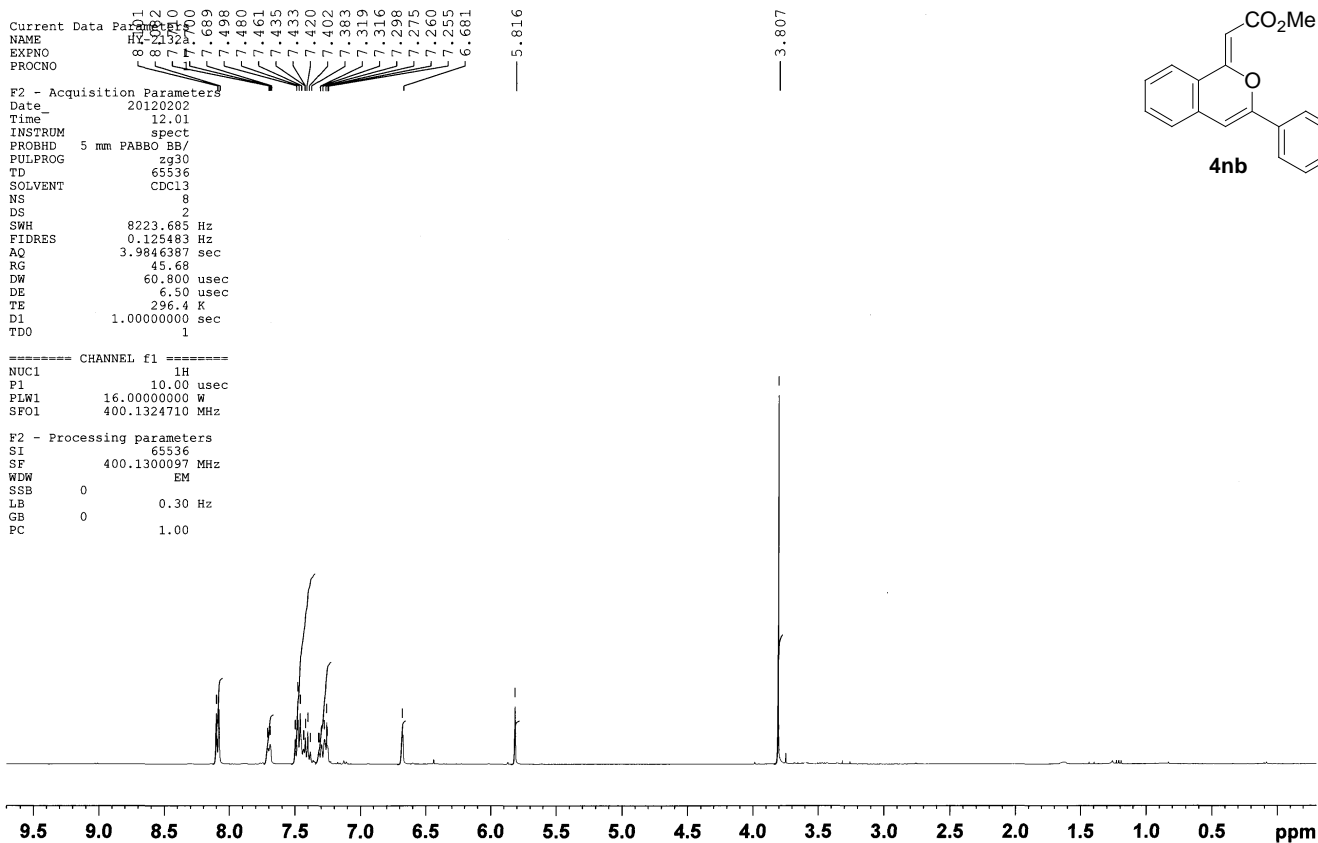

166.04  
160.38  
151.58  
132.06  
129.02  
129.61  
128.74  
128.02  
126.21  
125.04  
123.92  
123.21  
100.44  
88.82  
50.83

Current Data Parameters  
NAME HY-2132a  
EXPNO 2  
PROCNO 1

F2 - Acquisition Parameters  
Date\_ 20120202  
Time 12.04  
INSTRUM spect  
PROBHD 5 mm PABBO BB/  
PULPROG zgpg30  
TD 65536  
SOLVENT CDCl<sub>3</sub>  
NS 64  
DS 4  
SWH 24038.461 Hz  
FIDRES 0.366798 Hz  
AQ 1.3631988 sec  
RG 204.44  
DW 20.800 usec  
DE 6.50 usec  
TE 296.6 K  
D1 2.0000000 sec  
D11 0.03000000 sec  
TDO 1

===== CHANNEL f1 =====  
NUC1 13C  
P1 10.00 usec  
PLW1 78.0000000 W  
SFO1 100.6228293 MHz

===== CHANNEL f2 =====  
CPDPRG2 waltz16  
NUC2 1H  
PCPD2 80.00 usec  
PLW2 7.09999990 W  
PLW12 0.24961001 W  
PLW13 0.15975000 W  
SFO2 400.1316005 MHz

F2 - Processing parameters  
SI 32768  
SF 100.6127735 MHz  
WDW EM  
SSB 0  
LB 1.00 Hz  
GB 0  
PC 1.40

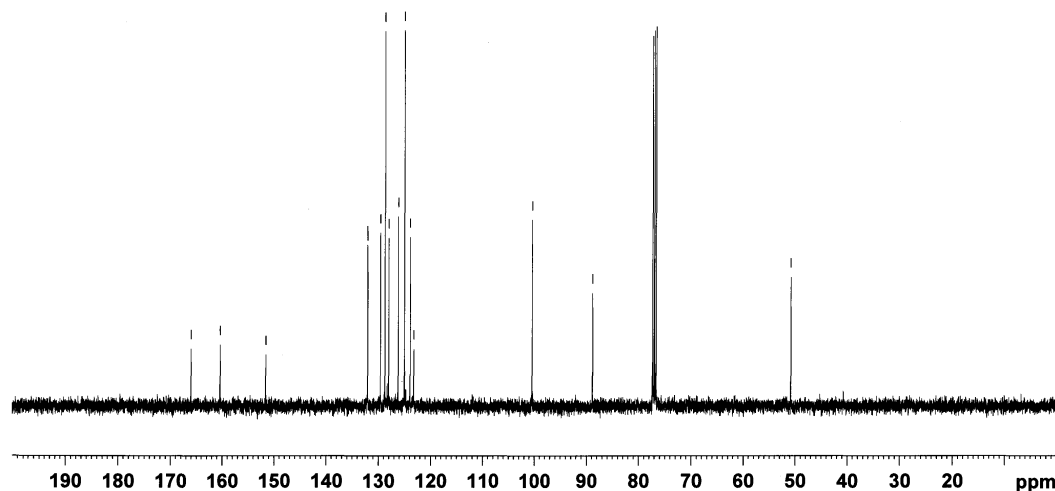



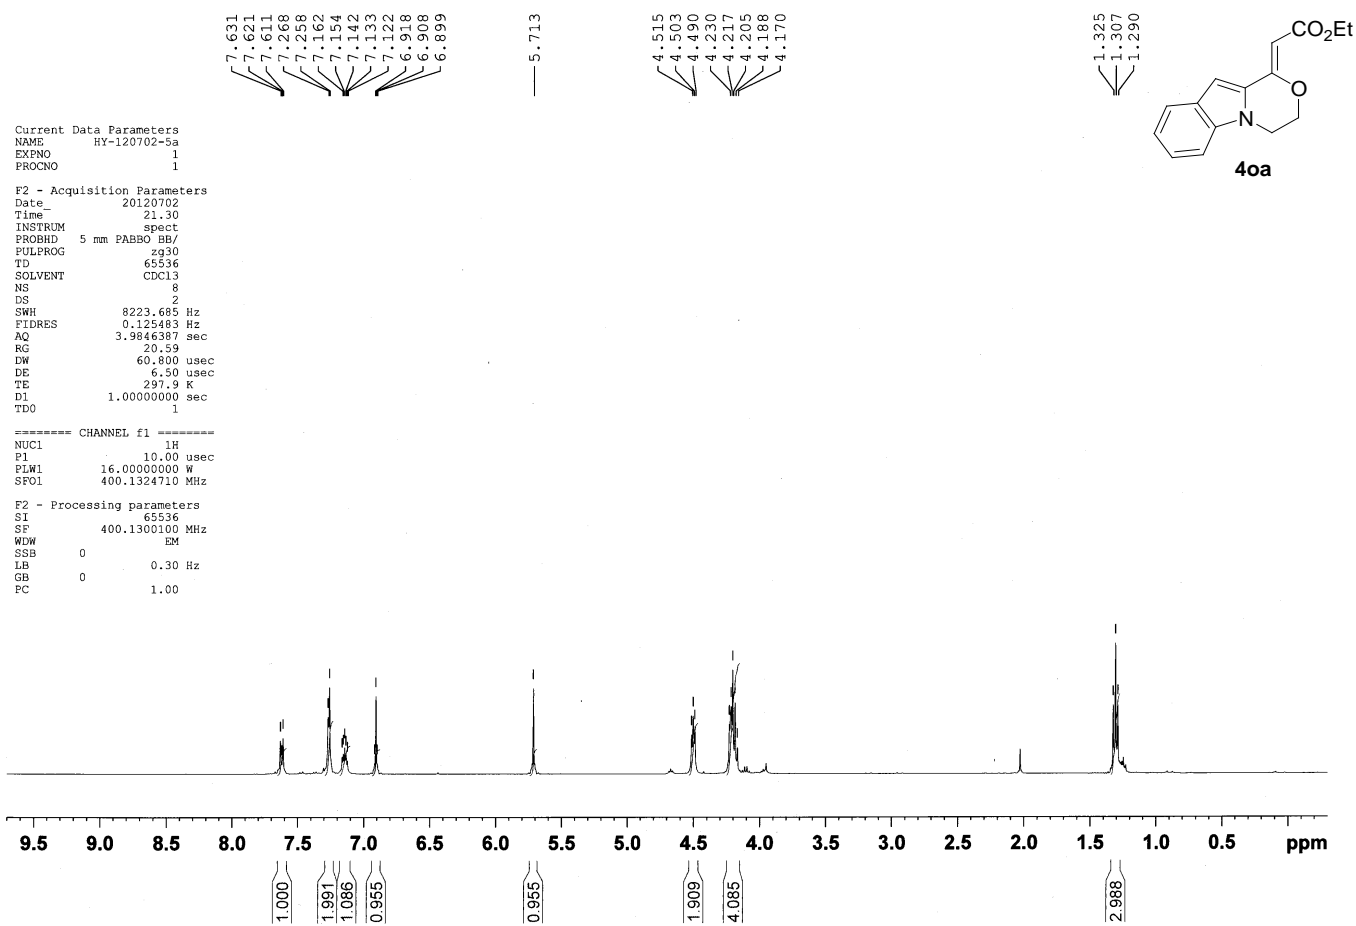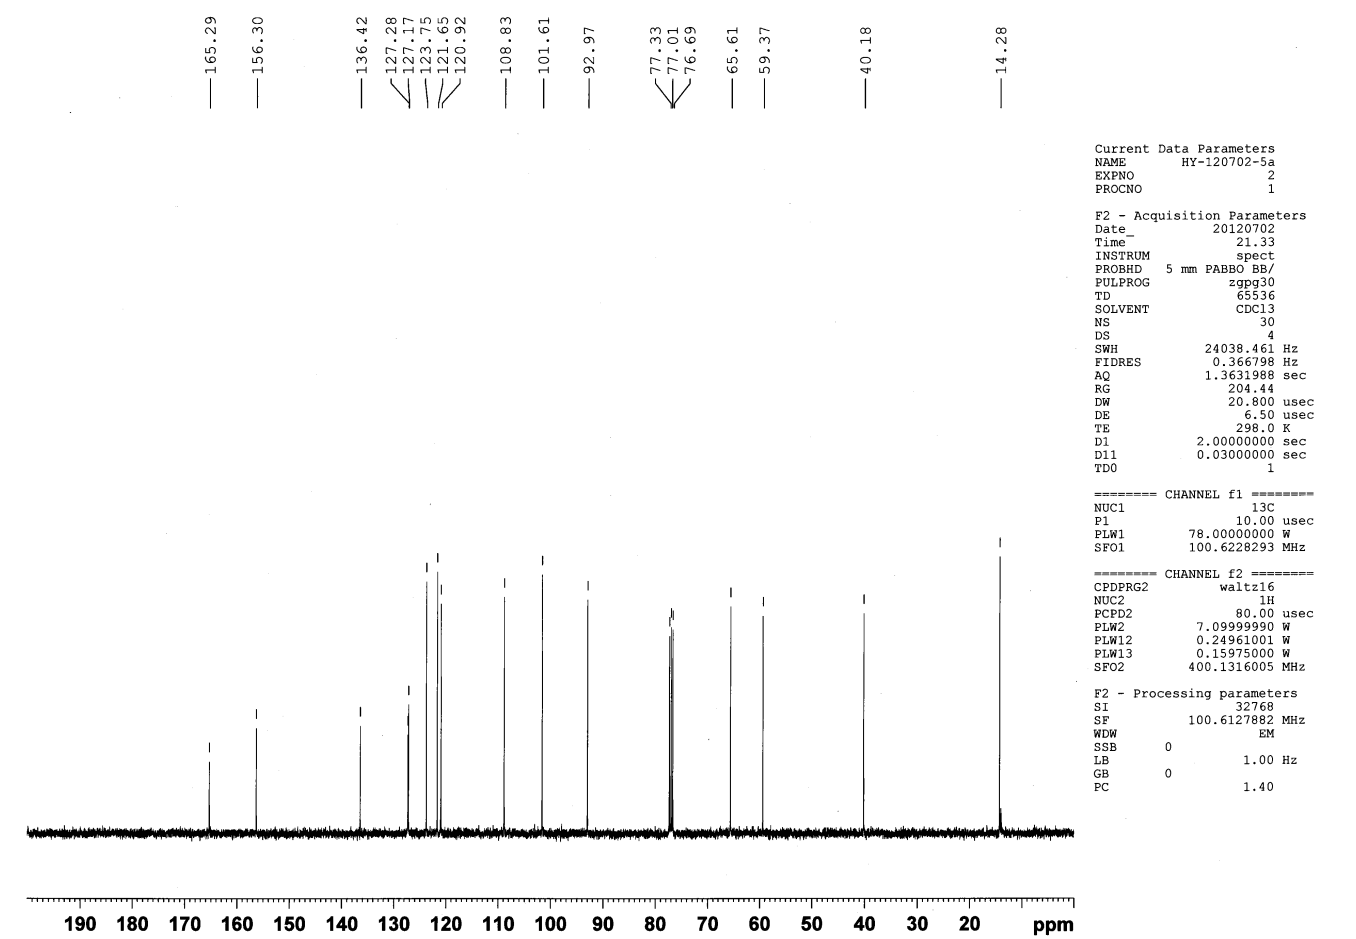

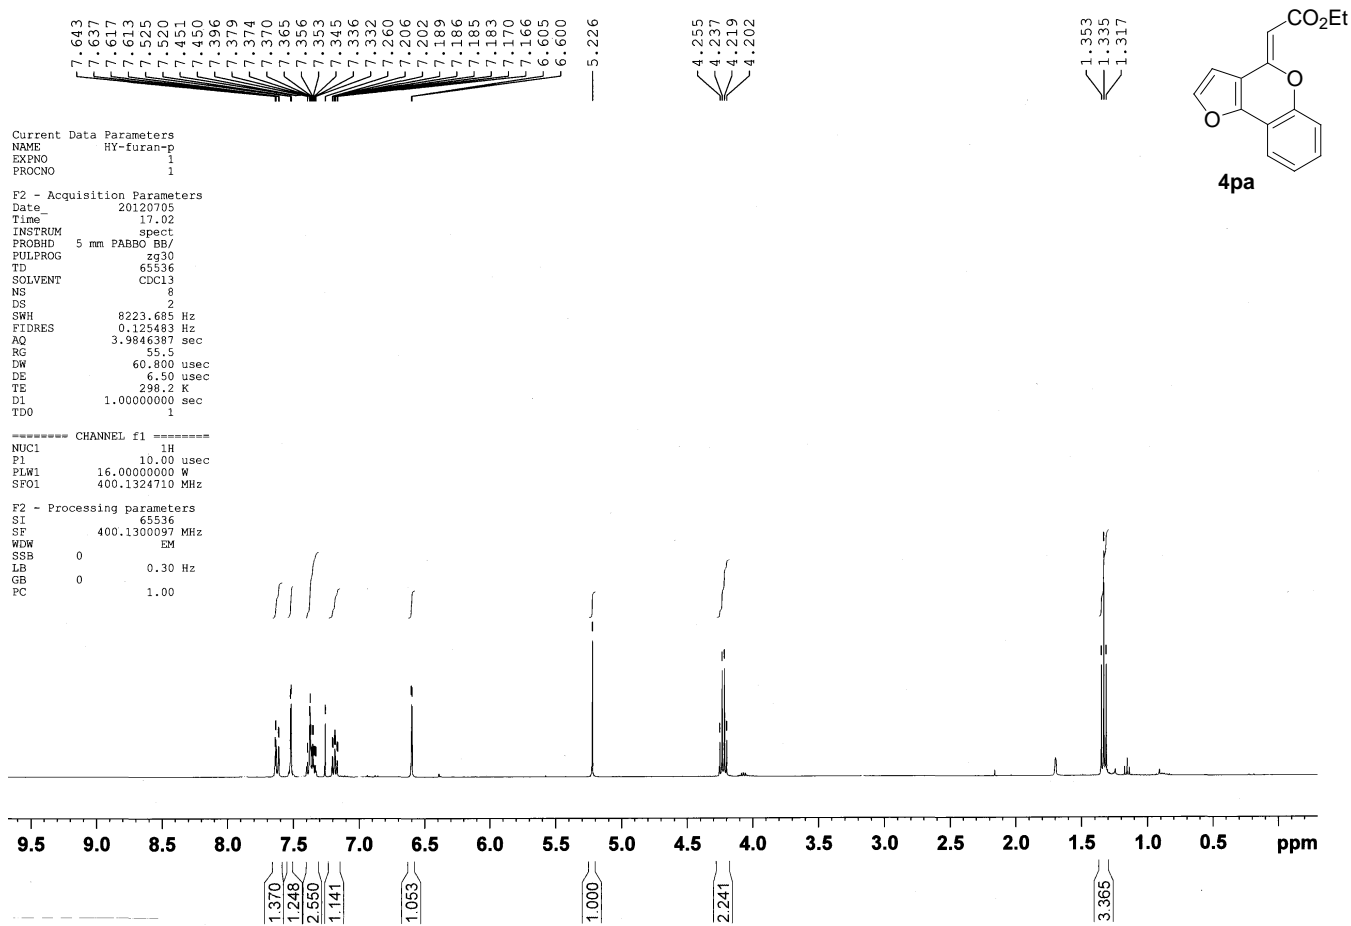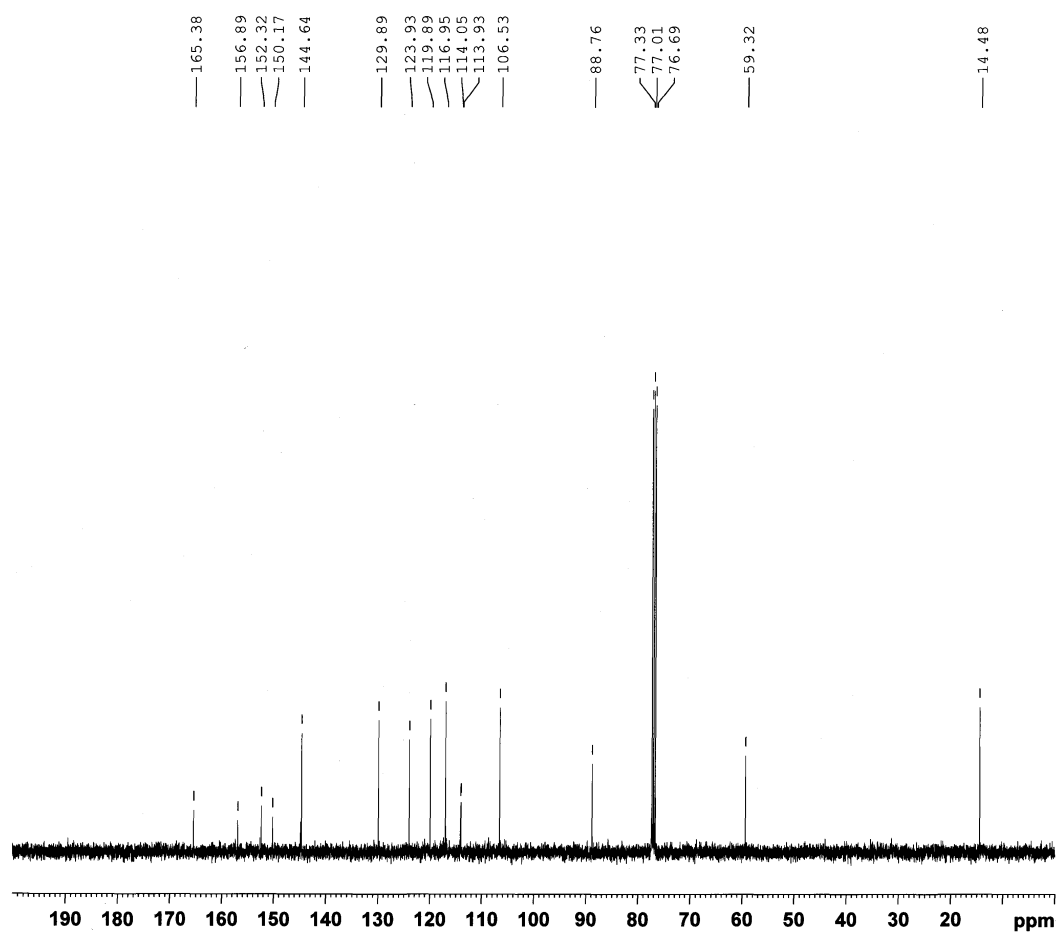

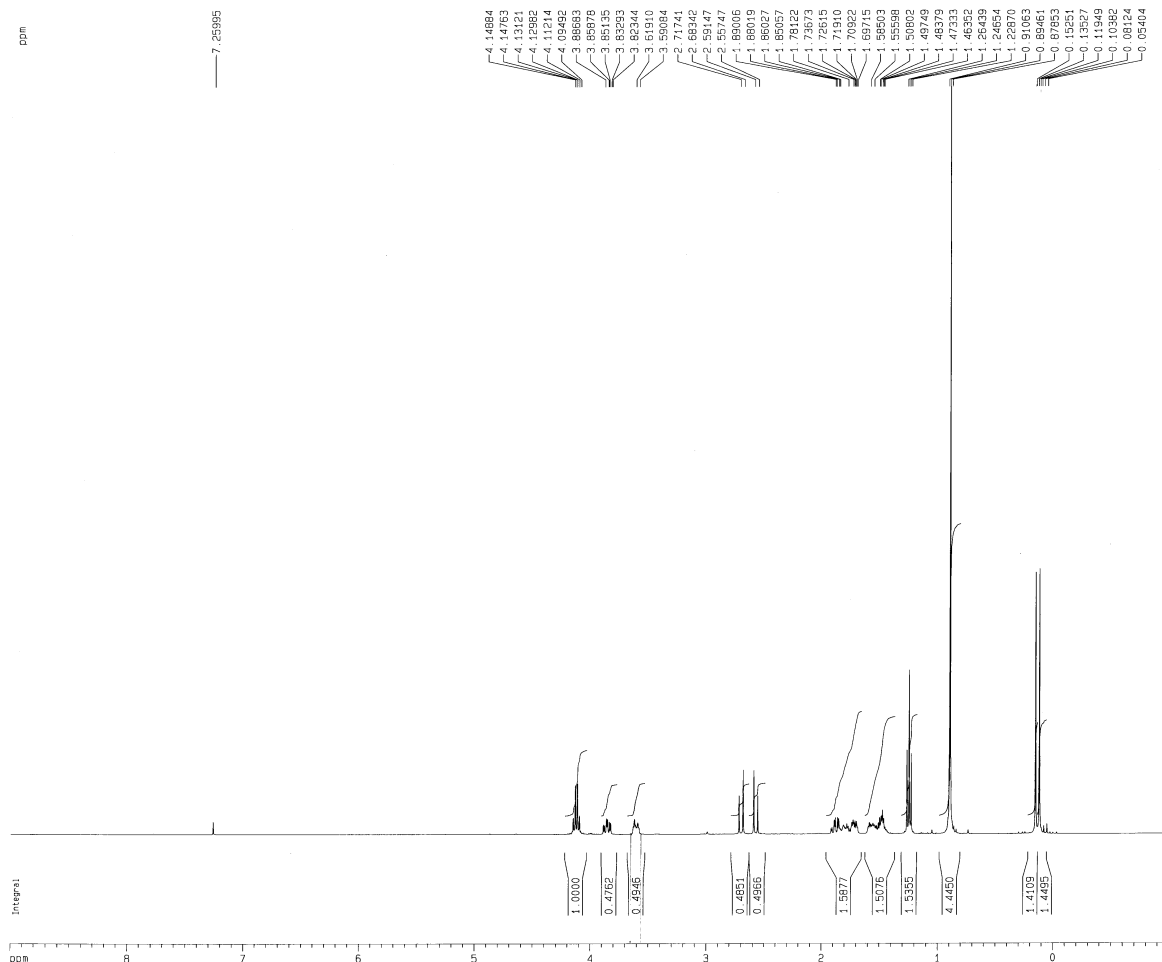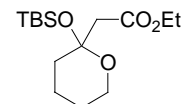

Current Data Parameters  
 NAME AK-177-S1  
 EXPNO 1  
 PROCNO 1

F2 - Acquisition Parameters  
 Date\_ 20110908  
 Time 15.47  
 INSTRUM spect  
 PROBHD 5 mm QNP 1H/13  
 PULPROG zg30  
 TD 65536  
 SOLVENT CDCl3  
 NS 11  
 DS 2  
 SWH 8278.146 Hz  
 FIDRES 0.126314 Hz  
 AQ 3.9564243 sec  
 RG 40.3  
 DW 60.400 usec  
 DE 6.00 usec  
 TE 294.2 K  
 D1 1.00000000 sec  
 MCREST 0.00000000 sec  
 MCWRK 0.01500000 sec

===== CHANNEL f1 =====  
 NUC1 1H  
 P1 11.50 usec  
 PL1 -4.00 dB  
 SF01 400.0324703 MHz

F2 - Processing parameters  
 SI 32768  
 SF 400.0300070 MHz  
 WDW EM  
 SSB 0  
 LB 0.30 Hz  
 GB 0  
 PC 1.00

1D NMR plot parameters  
 CX 32.00 cm  
 CY 21.00 cm  
 F1P 9.000 ppm  
 F1 3600.27 Hz  
 F2P -1.000 ppm  
 F2 -400.03 Hz  
 PPMCM 0.31250 ppm/cm  
 HZCM 125.00938 Hz/cm

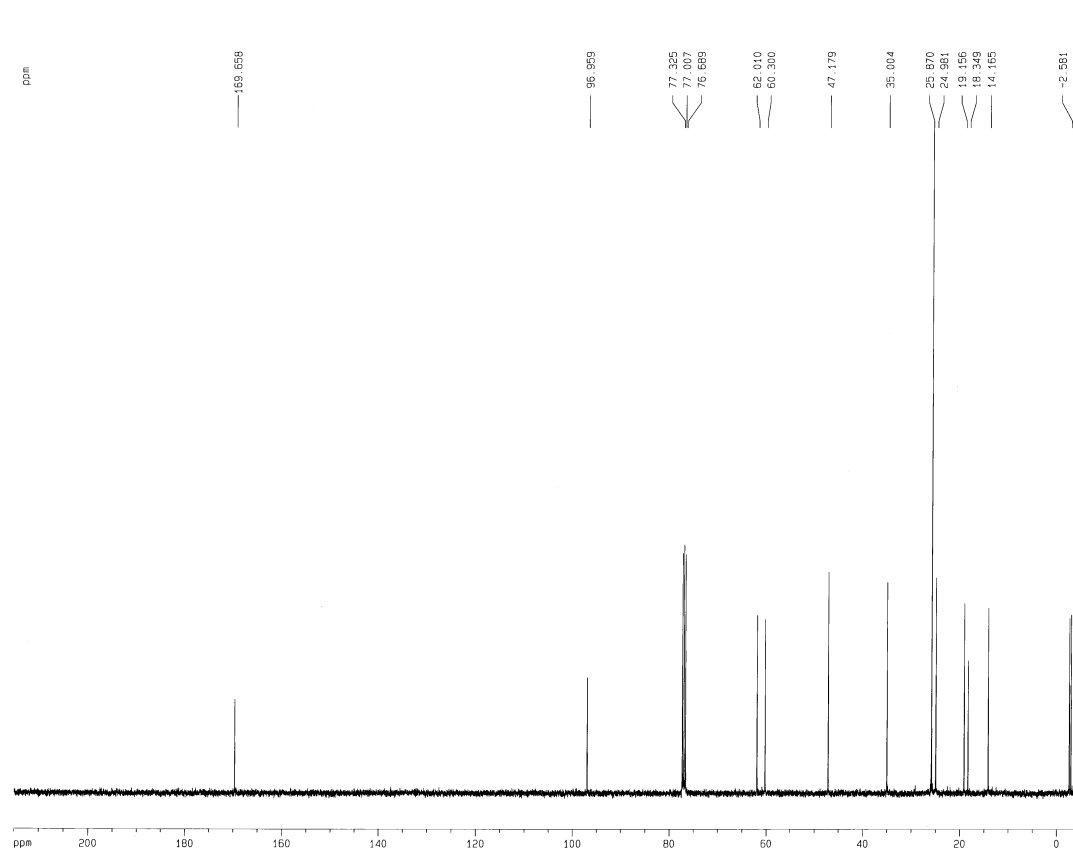

Current Data Parameters  
 NAME AK-177-S1  
 EXPNO 2  
 PROCNO 1

F2 - Acquisition Parameters  
 Date\_ 20110908  
 Time 15.57  
 INSTRUM spect  
 PROBHD 5 mm QNP 1H/13  
 PULPROG zgpg30  
 TD 65536  
 SOLVENT CDCl3  
 NS 168  
 DS 4  
 SWH 26178.010 Hz  
 FIDRES 0.399445 Hz  
 AQ 1.2517875 sec  
 RG 8192  
 DW 19.100 usec  
 DE 6.00 usec  
 TE 294.2 K  
 D1 2.00000000 sec  
 d11 0.03000000 sec  
 DELTA 1.89999998 sec  
 MCREST 0.00000000 sec  
 MCWRK 0.01500000 sec

===== CHANNEL f1 =====  
 NUC1 13C  
 P1 10.00 usec  
 PL1 -3.50 dB  
 SF01 100.5986886 MHz

===== CHANNEL f2 =====  
 CPDPRG2 waltz16  
 NUC2 1H  
 PCPD2 100.00 usec  
 PL2 -4.00 dB  
 PL12 17.00 dB  
 PL13 17.00 dB  
 SF02 400.0316001 MHz

F2 - Processing parameters  
 SI 32768  
 SF 100.5876270 MHz  
 WDW EM  
 SSB 0  
 LB 1.00 Hz  
 GB 0  
 PC 1.40

1D NMR plot parameters  
 CX 30.00 cm  
 CY 19.00 cm  
 F1P 215.000 ppm  
 F1 21626.34 Hz  
 F2P -5.000 ppm  
 F2 -502.94 Hz  
 PPMCM 7.33333 ppm/cm  
 HZCM 737.64258 Hz/cm

Current Data Parameters  
 NAME HY-2133a  
 EXPNO 1  
 PROCNO 1

F2 - Acquisition Parameters  
 Date 20120203  
 Time 21.26  
 INSTRUM spect  
 PROBHD 5 mm PABBO BB/  
 PULPROG zg30  
 TD 65536  
 SOLVENT CDCl3  
 NS 8  
 DS 2  
 SWH 8223.685 Hz  
 FIDRES 0.125483 Hz  
 AQ 3.9846387 sec  
 RG 7.99  
 DW 60.800 usec  
 DE 6.50 usec  
 TE 296.5 K  
 D1 1.00000000 sec  
 TDO 1

===== CHANNEL f1 =====  
 NUC1 1H  
 P1 10.00 usec  
 PLW1 16.00000000 W  
 SFO1 400.1324710 MHz

F2 - Processing parameters  
 SI 65536  
 SF 400.1300097 MHz  
 WDW EM  
 SSB 0  
 LB 0.30 Hz  
 GB 0  
 PC 1.00

7.461  
7.456  
7.308  
7.303  
7.288  
7.283  
7.260  
6.944  
6.924

4.809  
4.793  
4.777  
4.762  
4.746  
4.730  
4.715  
4.028  
4.020  
4.015  
4.007  
4.000  
3.992  
3.987  
3.979  
3.942  
3.934  
3.916  
3.908  
3.888  
3.880  
2.949  
2.936  
2.901  
2.888  
2.875  
2.861  
2.848  
2.835  
2.822  
2.591  
2.583  
2.575  
2.550  
2.542  
2.534  
1.064  
1.049  
0.936  
0.921  
0.867

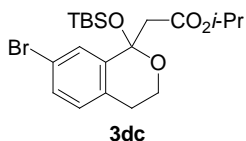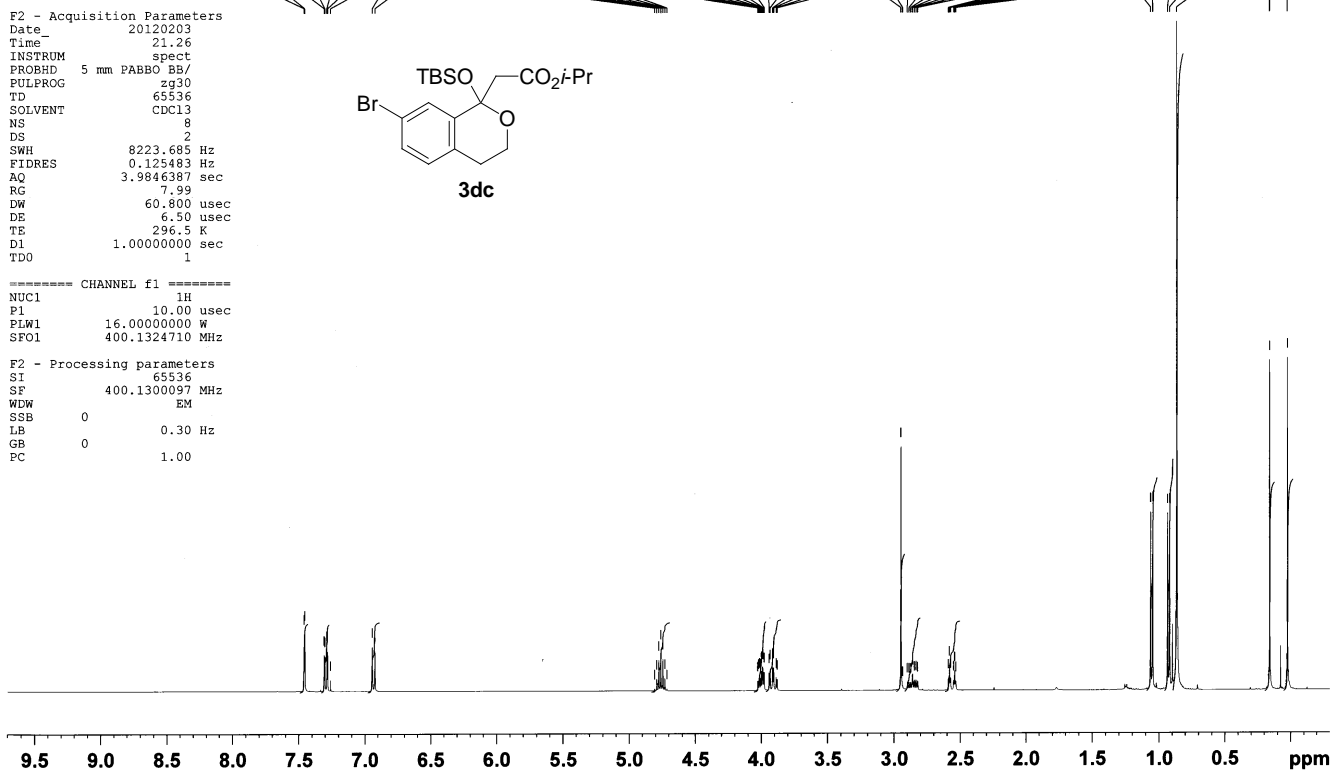

167.97  
140.54  
133.04  
130.37  
129.97  
129.42  
119.61  
96.85  
77.33  
77.01  
76.69  
67.39  
60.34  
49.01  
28.15  
25.68  
21.54  
21.32  
17.89  
-2.80  
-3.31

Current Data Parameters  
 NAME HY-2133a  
 EXPNO 2  
 PROCNO 1

F2 - Acquisition Parameters  
 Date 20120203  
 Time 21.31  
 INSTRUM spect  
 PROBHD 5 mm PABBO BB/  
 PULPROG zgpg30  
 TD 65536  
 SOLVENT CDCl3  
 NS 64  
 DS 4  
 SWH 24038.461 Hz  
 FIDRES 0.366798 Hz  
 AQ 1.3631988 sec  
 RG 204.44  
 DW 20.800 usec  
 DE 6.50 usec  
 TE 296.9 K  
 D1 2.00000000 sec  
 D11 0.03000000 sec  
 TDO 1

===== CHANNEL f1 =====  
 NUC1 13C  
 P1 10.00 usec  
 PLW1 78.00000000 W  
 SFO1 100.6228293 MHz

===== CHANNEL f2 =====  
 CPDPRG2 waltz16  
 NUC2 1H  
 PCPD2 80.00 usec  
 PLW2 7.09999990 W  
 PLW12 0.24961001 W  
 PLW13 0.15975000 W  
 SFO2 400.1316005 MHz

F2 - Processing parameters  
 SI 32768  
 SF 100.6127762 MHz  
 WDW EM  
 SSB 0  
 LB 1.00 Hz  
 GB 0  
 PC 1.40

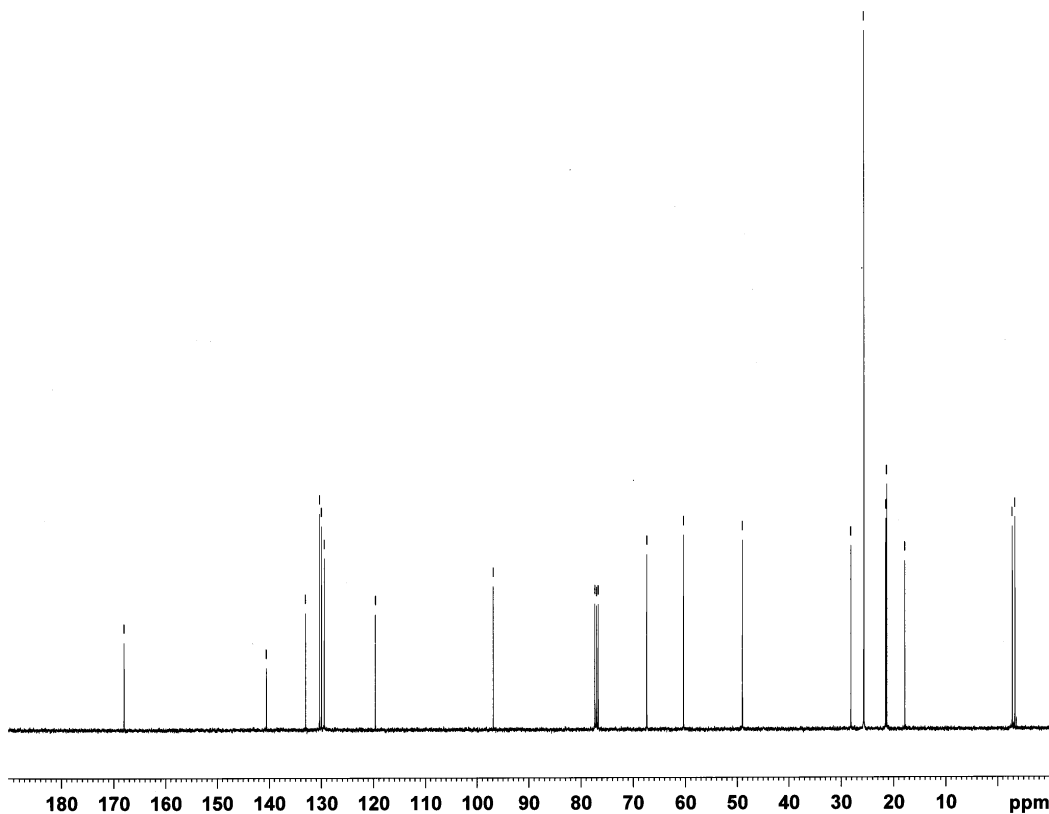

## **7. References**

1. (a) F. J. Waller, A. G. M. Barrett, D. C. Braddock, D. Ramprasad, R. M. McKinnell, A. J. P. White, D. J. Williams and R. J. Ducray, *J. Org. Chem.*, 1999, **64**, 2910–2913; (b) H. Yanai, A. Takahashi, T. Taguchi, *Tetrahedron*, 2007, **63**, 12149–12159.
2. H. Yanai, H. Ogura, H. Fukaya, A. Kotani, F. Kusu, T. Taguchi, *Chem.–Eur. J.*, 2011, **17**, 11742–11751.
3. K. Ruhland, A. Brück and E. Herdtweck, *Eur. J. Inorg. Chem.*, 2007, 944–964.
4. M. Mori, Y. Kagoshima, T. Uchida, T. Konosu, T. Shibayama, *Eur. Pat.*, 2003, 1362856.
5. M. Hellal, J.-J. Bourguignon and F. J.-J. Bihel, *Tetrahedron Lett.*, 2008, **49**, 62–65
6. J. T. Bamberg, T. Gabriel, N. E. Krauss, T. Mirzadegan, W. S. Palmer, D. B. Smith, *US Pat. 77 646*, 2004.
7. K. C. Majumdar, T. Bhattacharyya, *J. Chem. Res. (S)*, 1997, 244–245.
8. G. Sabitha, M. M. Reddy, D. Srinivas and J. S. Yadov, *Tetrahedron Lett.*, 1999, **40**, 165–166.
